# Supplementary material for: Visible-light-induced oxytrifluoromethylthiolation of α-diazo esters
Source: Royal Society of Chemistry journal article supplement (doi:10.1039/d4gc05690f), 2025-01-01

## Supplementary Information

### Visible-light-induced oxytrifluoromethylthiolation of $\alpha$ -diazo esters

Fei Tan,<sup>a\*</sup> Jian Yang,<sup>b</sup> Tao Song,<sup>a</sup> Zhangqun Hou,<sup>a</sup> Xiao Huang,<sup>a</sup> Jian Wang,<sup>a</sup> Ling Mei<sup>a</sup> and Hongbo Dong<sup>a\*</sup>

<sup>a</sup>Antibiotics Research and Re-evaluation Key Laboratory of Sichuan Province, Sichuan Industrial Institute of Antibiotics, School of Pharmacy, Chengdu University, Chengdu 610106, China

<sup>b</sup>Sichuan Institute for Drug Control (Sichuan Testing Center of Medical Devices), Chengdu 611731, China

\*E-mail: tanfei@cdu.edu.cn, donghongbo@cdu.edu.cn

#### CONTENTS:

|                                                                      |     |
|----------------------------------------------------------------------|-----|
| (A) General information.....                                         | S2  |
| (B) Typical procedure for $\alpha$ -diazo carbonyls preparation..... | S2  |
| (C) Procedure for PhtSMe and PhtOCF <sub>3</sub> preparation.....    | S3  |
| (D) General procedure for the photochemical reaction.....            | S4  |
| (E) Optimization of the reaction conditions.....                     | S4  |
| (F) Antimicrobial evaluation of <b>3ak</b> .....                     | S8  |
| (G) Control and transformation experiments.....                      | S9  |
| (H) UV-vis absorption and fluorescence experiments.....              | S11 |
| (I) NMR experiments.....                                             | S12 |
| (J) DFT analysis.....                                                | S16 |
| (K) Spectral characterization data for the products.....             | S19 |
| (L) References.....                                                  | S26 |
| (M) Copies of NMR spectra for the products.....                      | S28 |

## (A) General information

$^1\text{H}$  NMR spectra were recorded on commercial instruments (400 MHz). Chemical shifts were recorded in ppm relative to tetramethylsilane and with the solvent resonance as the internal standard. Data were reported as follows: chemical shift, multiplicity (s = singlet, d = doublet, t = triplet, q = quartet, m = multiplet), coupling constants (Hz), integration.  $^{13}\text{C}\{^1\text{H}\}$  NMR data were collected on commercial instruments (101 MHz) with complete proton decoupling.  $^{19}\text{F}\{^1\text{H}\}$  NMR spectra were collected on commercial instruments (376 MHz) with complete proton decoupling. Chemical shifts were reported in ppm from the tetramethylsilane with the solvent resonance as internal standard. HRMS was recorded on a commercial apparatus (FTMS+c ESI). Amide-based electrophilic trifluoromethylthiolating reagents **1a–1d**, PhtSCHF<sub>2</sub> (**6a**) and PhtSCCl<sub>3</sub> (**9a**) were purchased from domestic suppliers, and used directly. PhtSMe (**4a**) and PhtOCF<sub>3</sub> (**12a**) are known compounds, which were synthesized according to the documents. Diazo compounds **2a–2t**, **2v–2z** are known compounds, which were prepared through the previously reported literature methods, diazo ester **2u** was obtained from domestic supplier and used directly. Chromatography: Qingdao Hailang silica gel (300–400 mesh). The photochemical reactor and LEDs used in this manuscript were purchased from Technology Research: PhotoSyn 3.0.

## (B) Typical procedure for $\alpha$ -diazo carbonyls preparation<sup>1</sup>

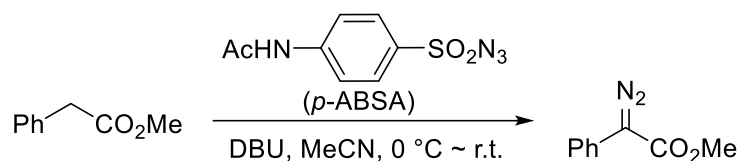

To a solution of methyl 2-phenylacetate (5.0 mmol, 1.0 equiv) and *p*-acetamidobenzenesulfonylazide (*p*-ABSA) (7.5 mmol, 1.5 equiv) in dry CH<sub>3</sub>CN (25 mL) was added DBU (15 mmol, 1.5 equiv) dropwise at 0 °C. Then the mixture was stirred overnight at room temperature. The reaction was then quenched with aqueous ammonium chloride solution, followed by extraction with Et<sub>2</sub>O (2 × 10 mL). The combined organic extracts were anhydrous Na<sub>2</sub>SO<sub>4</sub>, filtered and concentrated under reduced pressure. The yellow crude product was purified by column chromatography (silica gel, Pet: Et<sub>2</sub>O = 20:1) to give the product as an orange oil. For other  $\alpha$ -diazoesters, this synthesis method could be applied.

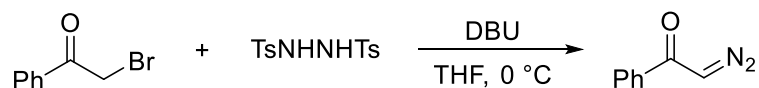

2-Bromo-1-phenylethan-1-one (5 mmol, 1.0 equiv) and *N,N'*-ditosylhydrazine (5.5 mmol, 1.1 equiv) were dissolved in THF (25 mL) and cooled to 0 °C. DBU (7.5 mmol, 1.5 equiv) was added dropwise and stirred at the temperature for 1 hour. Then the mixture was quenched by the addition of saturated NaHCO<sub>3</sub> solution, followed by the extraction with ethyl acetate three times (3 × 30 mL). The organic phase was washed with brine, dried over MgSO<sub>4</sub> and evaporated to give the residue, which was purified by column chromatography (petroleum/EA = 10/1) to give the product as a yellow solid.

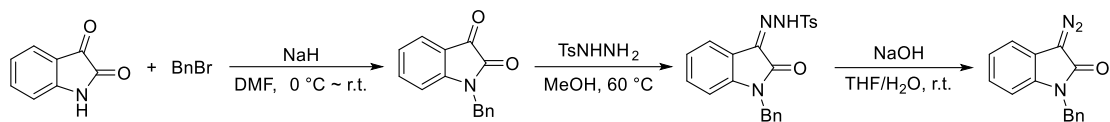

A solution of isatin (20 mmol, 1.0 equiv) in DMF (36 mL) was cooled to 0 °C (ice bath). NaH (60% dispersion in mineral oil, 22 mmol, 1.1 equiv) was added portionwise to the orange solution. The mixture was stirred for 10 min at 0 °C, followed by the addition of benzyl bromide (22 mmol, 1.1 equiv). Then the mixture was stirred at room temperature for 15 min, and cool brine was introduced to precipitate the product. After filtration and drying, the product was used directly for the next step.

1-Benzyl-isatin (4.2 mmol, 1.0 equiv) was suspended in MeOH (20 mL). The suspension was heated to 60 °C and tosylhydrazine (4.6 mmol, 1.1 equiv) was added in portions. Yellow precipitate appeared and the reaction mixture was stirred at 60 °C for 8 h, then cooled to room temperature. The tosylhydrazone product (yellow precipitate) was collected by filtration and was used without further purification.

To a solution of the tosylhydrazone (3 mmol, 1.0 equiv) in THF (10 mL) was added aqueous solution of NaOH (4.5 mmol, 1.5 equiv, in 10 mL H<sub>2</sub>O). The reaction mixture was stirred at room temperature for 3 h. H<sub>2</sub>O (30 mL) was added to the reaction mixture and followed by the extraction with EtOAc (30 mL). The organic layer was washed by brine twice and dried over Na<sub>2</sub>SO<sub>4</sub>, filtered, evaporated to give the residue. Flash chromatography (PE:EA = 10:1) afforded the 2-diazo-1-phenylethan-1-one as a deep-orange crystal.

### (C) Procedure for PhtSMe and PhtOCF<sub>3</sub> preparation<sup>2</sup>

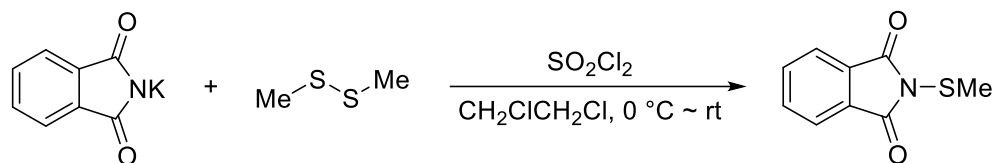

Dimethyldisulfide (10 mmol, 1.0 equiv) was dissolved in 1,2-dichloroethane (20 mL) and cooled to 0 °C. A 1,2-dichloroethane solution (20 mL) of sulfuryl chloride (11 mmol) was added dropwise over 15 min via an addition funnel to the cooled dimethyldisulfide solution. The reaction was stirred at 0 °C for an additional 5 min and was then rapidly charged with potassium phthalimide (20 mmol). After 20 min at 0 °C and 90 min at room temperature, the reaction mixture was filtered under vacuum and the resultant yellow filtrate was concentrated to solids. The solids were triturated with MeOH overnight to afford PhtSMe as a white fluffy solid.

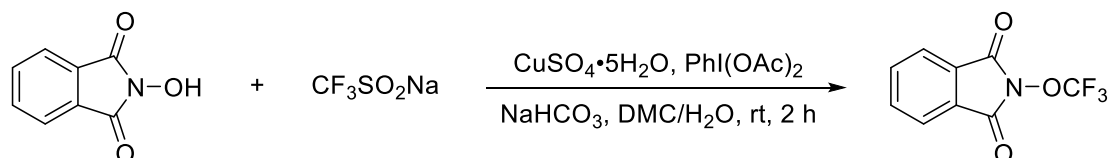

An oven-dried reaction tube with a stirrer bar was charged with NaHCO<sub>3</sub> (5 mmol, 0.5 equiv), CuSO<sub>4</sub>·5H<sub>2</sub>O (0.5 mmol, 0.05 equiv), and CF<sub>3</sub>SO<sub>2</sub>Na (20 mmol, 2.0 equiv). Then, H<sub>2</sub>O (8.0 mL) and dimethyl carbonate (30.0 mL) were added. The reaction mixture was cooled to 0 °C. PhI(OAc)<sub>2</sub> (20 mmol, 2.0 equiv) and *N*-

hydroxyphthalimide (10 mmol, 1.0 equiv) were added at 0 °C. Then, the reaction mixture was stirred at room temperature for 2 h. The aqueous layer was separated and extracted with EtOAc three times. The combined organic layer was washed with saturated aqueous NaHCO<sub>3</sub>, dried over anhydrous MgSO<sub>4</sub>, then filtered and concentrated in vacuo to give a residue. The residue was purified with silica gel column chromatography (hexane/EtOAc = 20:1) to afford PhtOCF<sub>3</sub> as a white solid.

#### (D) General procedure for the photochemical reaction

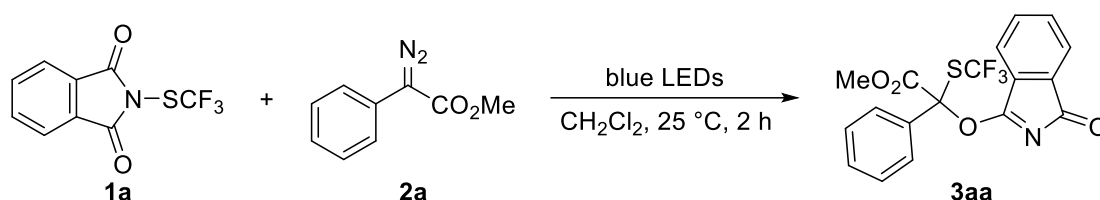

A dry reaction tube was charged with **1a** (0.1 mmol) under N<sub>2</sub> atmosphere, then dichloromethane (0.5 mL) was added. Subsequently,  $\alpha$ -diazo ester **2a** (0.2 mmol) was added and the mixture was stirred under the irradiation of blue LEDs (460  $\pm$  5 nm, 3 W) at 25 °C for 2 h. Finally, the crude mixture was purified by column chromatography on silica gel (petroleum/ethyl acetate = 10:1 as eluent) at -20 °C to afford the product **3aa** as a colorless gum.

#### (E) Optimization of the reaction conditions

Table S1: Screen of the solvent<sup>a</sup>

The reaction scheme for the solvent screen shows the same reaction as in (D), but with the solvent variable. The reagents are blue LEDs, solvent, 25 °C, 2 h.

| Entry | Solvent                              | Yield (%)      |
|-------|--------------------------------------|----------------|
| 1     | CH <sub>2</sub> Cl <sub>2</sub>      | 50             |
| 2     | CHCl <sub>3</sub>                    | 26             |
| 3     | CH <sub>2</sub> ClCH <sub>2</sub> Cl | 49             |
| 4     | CHCl <sub>2</sub> CH <sub>2</sub> Cl | 33             |
| 5     | CHCl <sub>2</sub> CHCl <sub>2</sub>  | — <sup>b</sup> |
| 6     | EA                                   | 46             |
| 7     | Methyl Acetate                       | 45             |
| 8     | Ethyl Formate                        | 37             |
| 9     | MeCN                                 | 48             |
| 10    | DMF                                  | — <sup>b</sup> |
| 11    | DMSO                                 | — <sup>b</sup> |
| 12    | toluene                              | — <sup>b</sup> |

<sup>a</sup>Unless otherwise noted, all reactions were performed with **1a** (0.1 mmol) and **2a** (0.1 mmol) in solvent (0.5 mL) under blue LEDs (460  $\pm$  5 nm, 40 W) at 25 °C for 2 h. Isolated yield. <sup>b</sup>**2a** decomposed and **3aa** was undetected.

**Table S2: Screen of the ratio between 1a and 2a<sup>a</sup>**

Reaction scheme showing the reaction of **1a** (x mmol) and **2a** (y mmol) under blue LEDs in CH<sub>2</sub>Cl<sub>2</sub> at 25 °C for 2 h to form **3aa**.

| Entry | x    | y    | Yield (%) |
|-------|------|------|-----------|
| 1     | 0.2  | 0.1  | 64        |
| 2     | 0.15 | 0.1  | 55        |
| 3     | 0.1  | 0.1  | 50        |
| 4     | 0.1  | 0.15 | 67        |

<sup>a</sup>Unless otherwise noted, all reactions were performed with **1a** (x mmol) and **2a** (y mmol) in CH<sub>2</sub>Cl<sub>2</sub> (0.5 mL) under blue LEDs (460 ± 5 nm, 40 W) at 25 °C for 2 h. Isolated yield.

**Table S3: Screen of the irradiation conditions<sup>a</sup>**

Reaction scheme showing the reaction of **1a** and **2a** under blue LEDs in CH<sub>2</sub>Cl<sub>2</sub> at 25 °C for 2 h to form **3aa**.

| Entry             | Blue LEDs        | Yield (%) |
|-------------------|------------------|-----------|
| 1                 | 460 ± 5 nm, 20 W | 31        |
| 2                 | 460 ± 5 nm, 10 W | 53        |
| 3                 | 460 ± 5 nm, 5 W  | 53        |
| 4                 | 460 ± 5 nm, 3 W  | 67        |
| 5                 | 460 ± 5 nm, 2 W  | 58        |
| 6 <sup>b</sup>    | 460 ± 5 nm, 2 W  | 64        |
| 7 <sup>c</sup>    | 480 ± 5 nm, 3 W  | 37        |
| 8 <sup>c</sup>    | 470 ± 5 nm, 3 W  | 46        |
| 9                 | 450 ± 5 nm, 3 W  | 39        |
| 10                | 440 ± 5 nm, 3 W  | 47        |
| 11 <sup>d</sup>   | 460 ± 5 nm, 3 W  | 76        |
| 12 <sup>d,e</sup> | 460 ± 5 nm, 3 W  | 39        |
| 13 <sup>d,f</sup> | 460 ± 5 nm, 3 W  | 49        |
| 14 <sup>d,g</sup> | 460 ± 5 nm, 3 W  | 34        |
| 15 <sup>h</sup>   | —                | N.R.      |
| 16 <sup>i</sup>   | —                | N.R.      |
| 17 <sup>j</sup>   | —                | trace     |

<sup>a</sup>Unless otherwise noted, all reactions were performed with **1a** (0.1 mmol) and **2a** (0.15 mmol) in CH<sub>2</sub>Cl<sub>2</sub> (0.5 mL) under blue LEDs at 25 °C for 2 h. Isolated yield.

<sup>b</sup>Reaction time: 3 h. <sup>c</sup>Reaction time: 4 h. <sup>d</sup>0.2 mmol **2a** was used. <sup>e</sup>0.2 mL CH<sub>2</sub>Cl<sub>2</sub> was used. <sup>f</sup>1.0 mL CH<sub>2</sub>Cl<sub>2</sub> was used. <sup>g</sup>At -10 °C. <sup>h</sup>In the dark at 35 °C for 2 h, N.R. = no reaction. <sup>i</sup>In the dark at 40 °C for 6 h. <sup>j</sup>In the dark at 80 °C for 6 h, most of **2a** decomposed and **1a** remained,  $\alpha$ -keto ester **16** and (*E*)-dimethyl 2,3-diphenylfumarate were detected.

**Table S4: Full list of the products<sup>a</sup>**

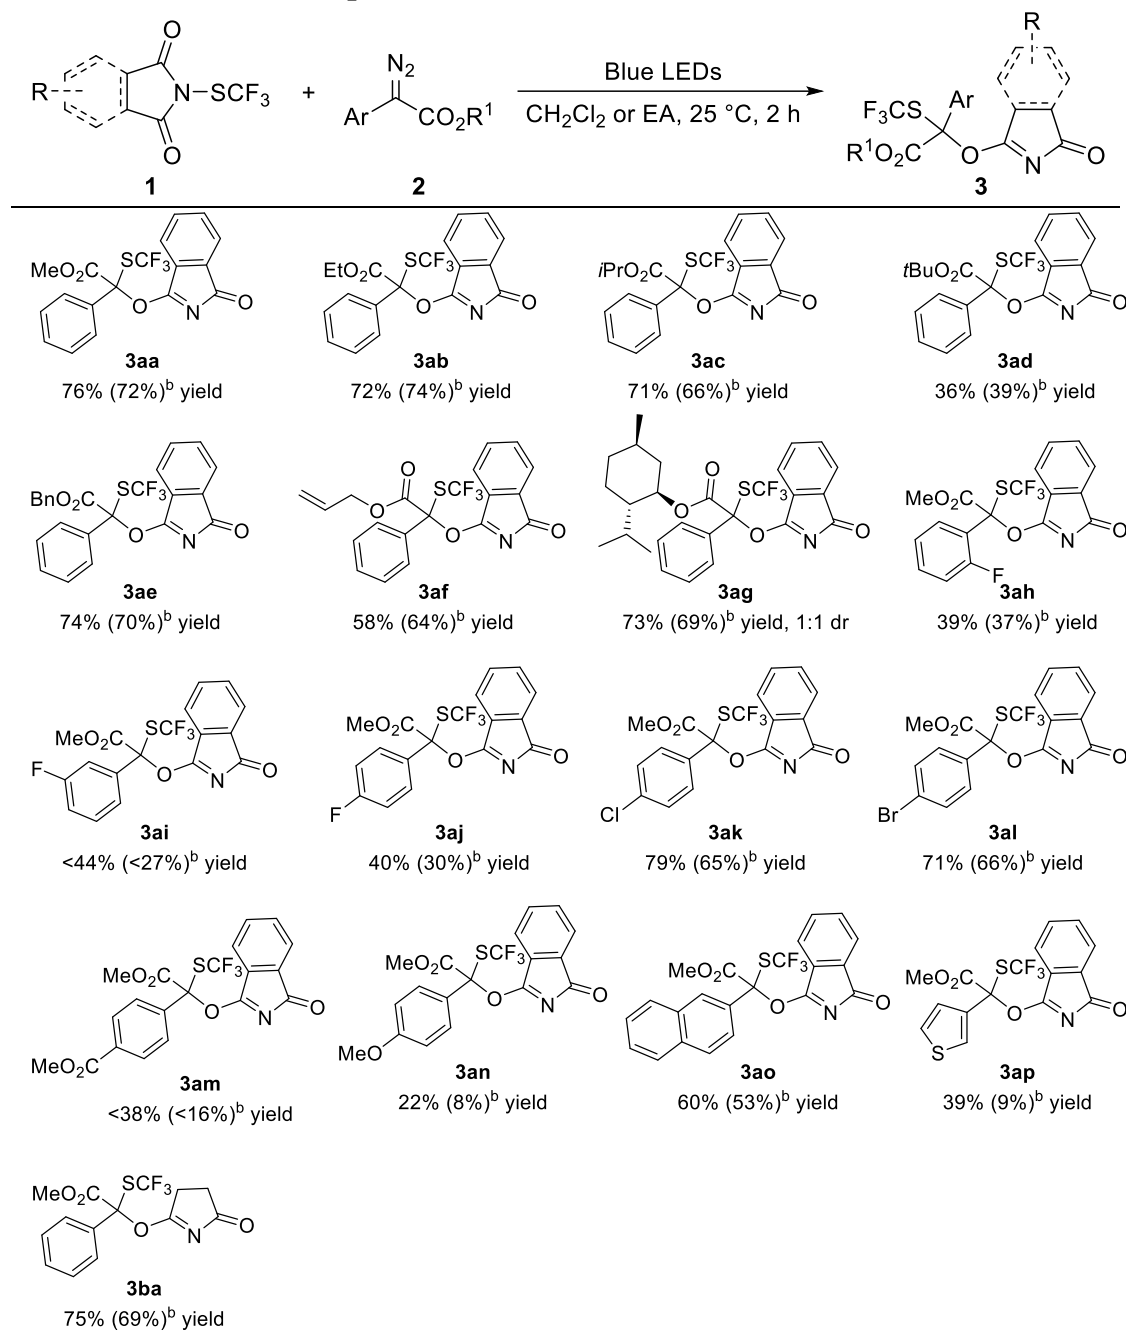

**limitations:**

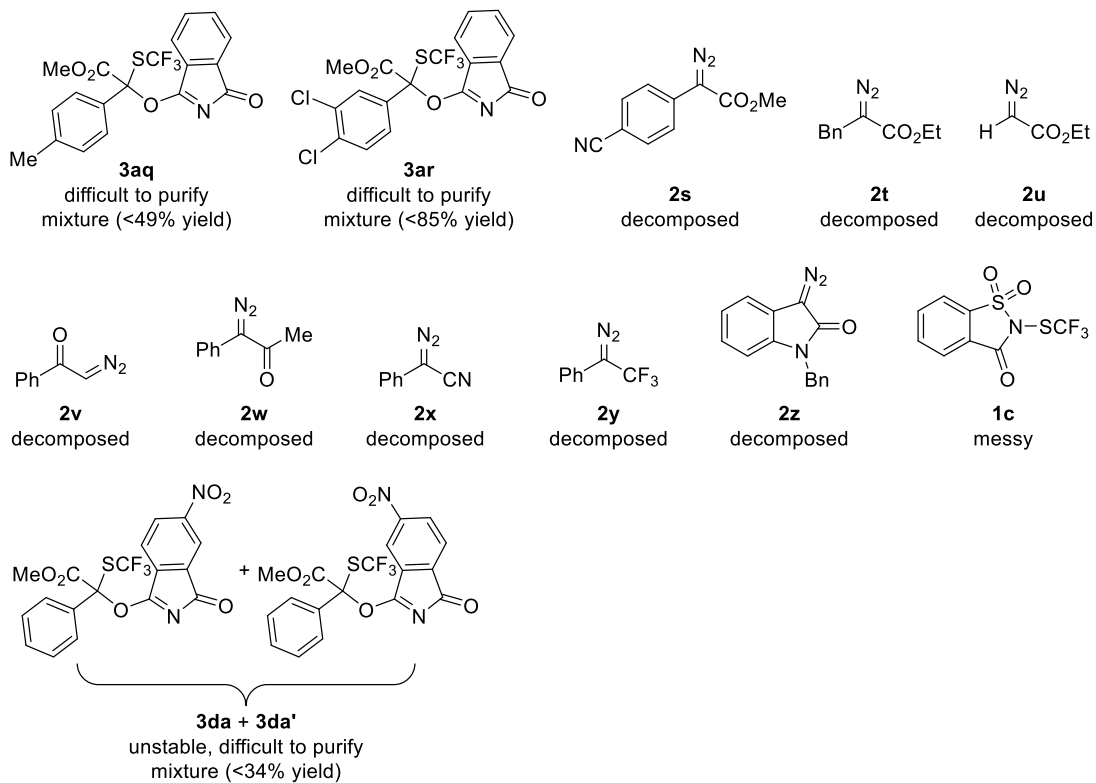

<sup>a</sup>Unless otherwise noted, all reactions were performed with **1** (0.1 mmol) and **2** (0.2 mmol) in CH<sub>2</sub>Cl<sub>2</sub> (0.5 mL) under blue LEDs (460 ± 5 nm, 3 W) at 25 °C for 2 h. Isolated yield. <sup>b</sup>Using EA (0.5 mL) as the solvent.

## (F) Antimicrobial evaluation of 3ak

The Gram-positive *Staphylococcus aureus* ATCC25923 and Gram-negative *Escherichia coli* ATCC25922 were treated with the DMSO solution of **3ak** (0.39  $\mu\text{g/mL}$ , 0.78  $\mu\text{g/mL}$ , 1.56  $\mu\text{g/mL}$ , 3.13  $\mu\text{g/mL}$ , 6.25  $\mu\text{g/mL}$ , 12.50  $\mu\text{g/mL}$ , 25.00  $\mu\text{g/mL}$ , 50.00  $\mu\text{g/mL}$ , 100.00  $\mu\text{g/mL}$ ), respectively.

### a) Survival probability of *S. aureus* ATCC25923

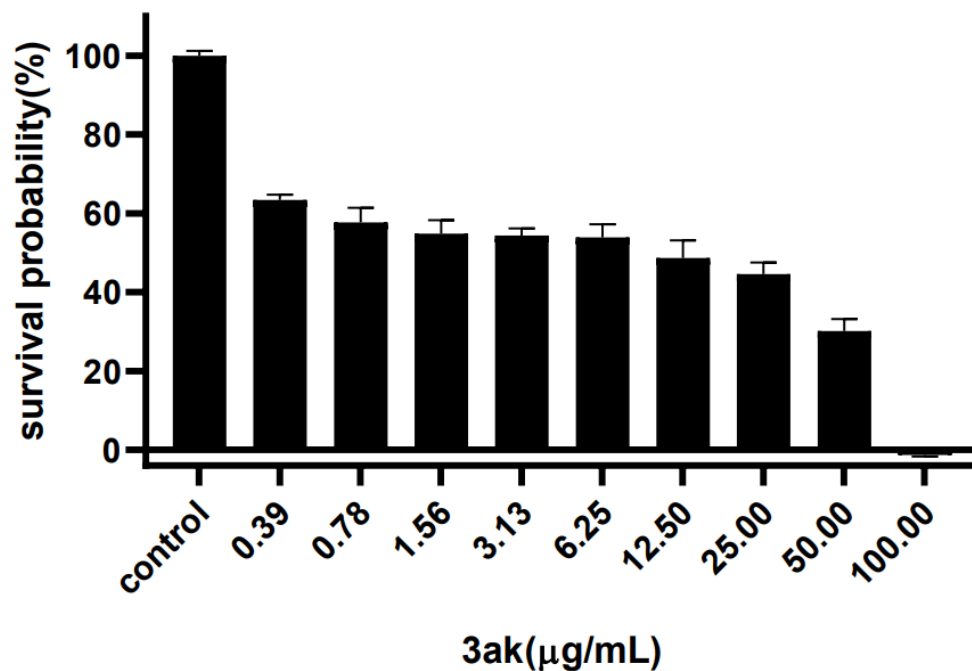

### b) Survival probability of *E. coli* ATCC25922

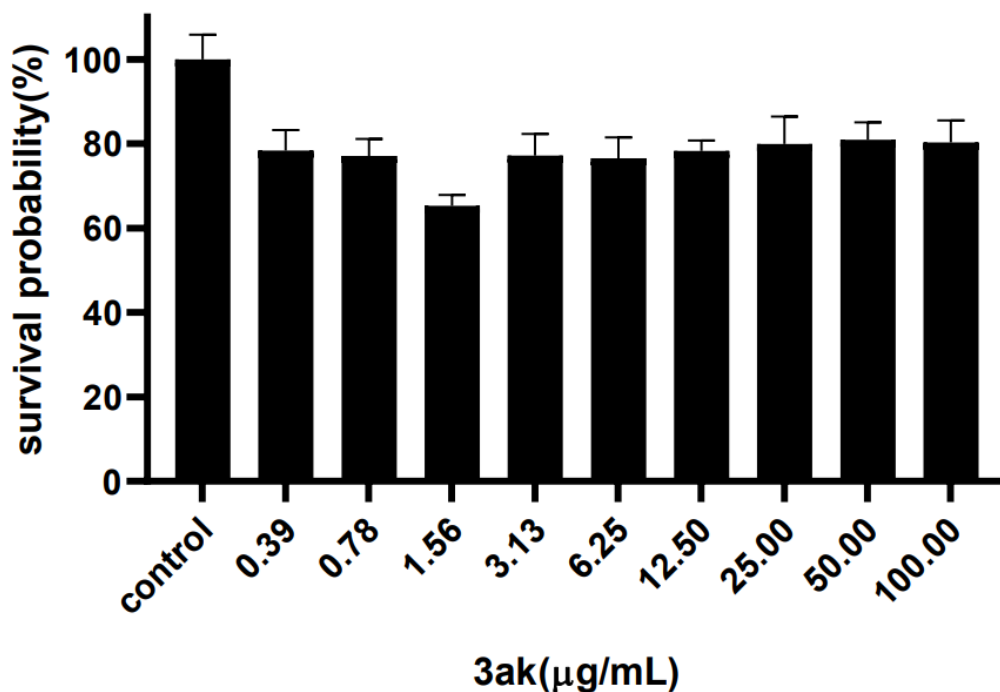



## (G) Control and transformation experiments

### a) Variation of the trifluoromethylthio group

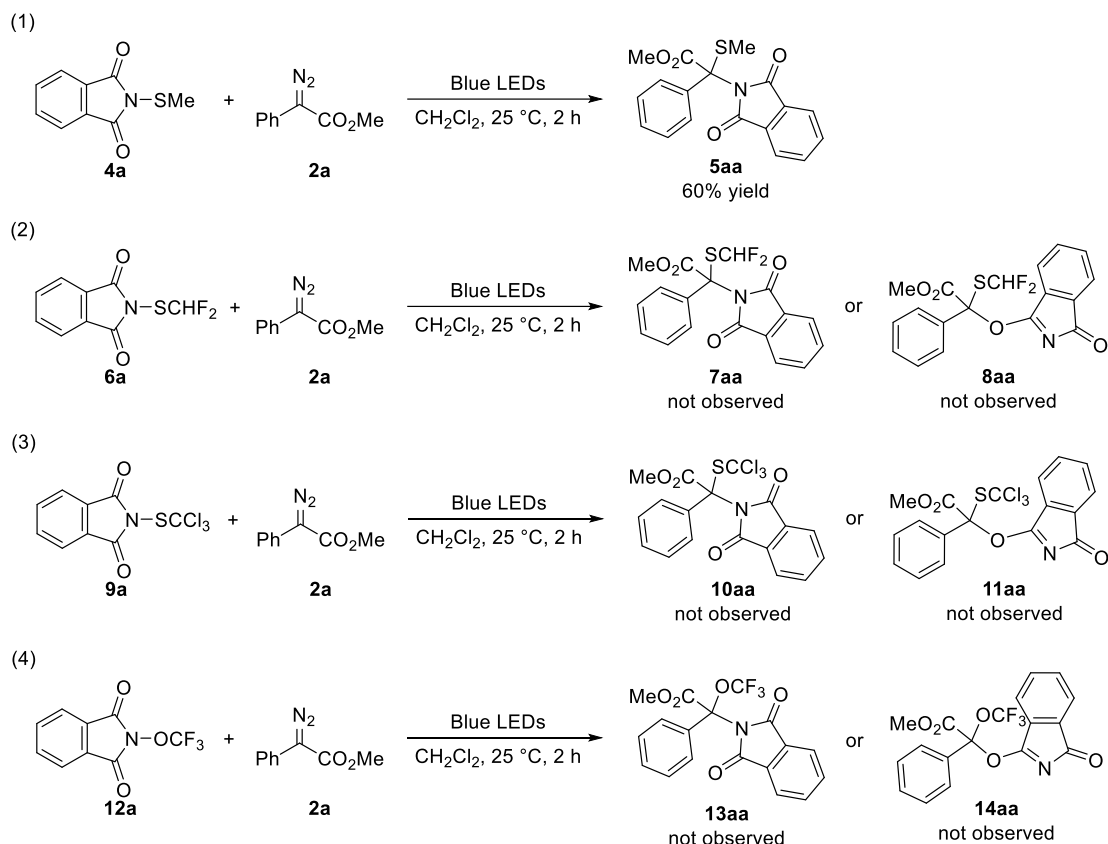

A dry reaction tube was charged with *N*-substituted phthalimide **4a/6a/9a/12a** (0.1 mmol), then  $\text{CH}_2\text{Cl}_2$  (0.5 mL) was added. Subsequently,  $\alpha$ -diazo ester **2a** (0.2 mmol) was added and the mixture was stirred under the irradiation of blue LEDs ( $460 \pm 5$  nm, 3 W) at  $25^\circ\text{C}$  for 2 h. The reaction was monitored by TLC and purified by column chromatography on silica gel (petroleum/ethyl acetate = 10:1 as eluent) at  $-20^\circ\text{C}$ . For substrate **4a**, the crude mixture was purified by column chromatography on silica gel (petroleum/ethyl acetate = 8:1 as eluent) at room temperature to afford product **5aa** as a colorless gum.

### b) Radical termination experiment

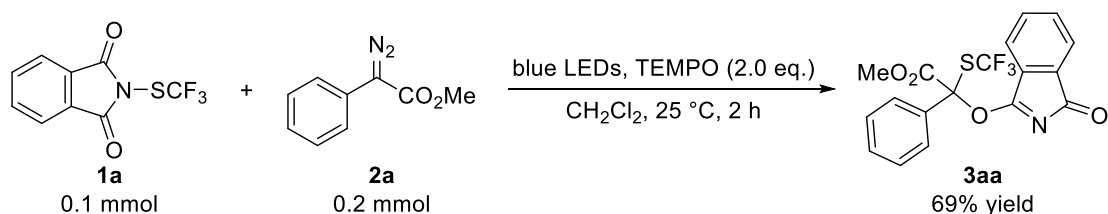

A dry reaction tube was charged with **1a** (0.1 mmol) and TEMPO (0.2 mmol) under  $\text{N}_2$  atmosphere, then dichloromethane (0.5 mL) was added. Subsequently,  $\alpha$ -diazo ester **2a** (0.2 mmol) was added and the mixture was stirred under the irradiation of blue LEDs ( $460 \pm 5$  nm, 3 W) at  $25^\circ\text{C}$  for 2 h. Finally, the crude mixture was purified by column

chromatography on silica gel (petroleum/ethyl acetate = 10:1 as eluent) at -20 °C to afford the product **3aa** as a colorless gum.

### c) Carbene capture with (*E*)-stilbene

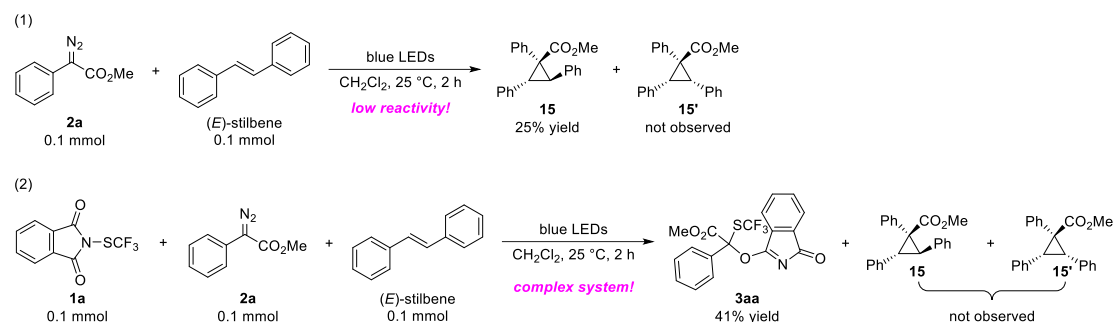

A dry reaction tube was charged with **1a** (0.1 mmol) and/or (*E*)-stilbene (0.1 mmol) under N<sub>2</sub> atmosphere, then dichloromethane (0.5 mL) was added. Subsequently,  $\alpha$ -diazo ester **2a** (0.1 mmol) was added and the mixture was stirred under the irradiation of blue LEDs (460  $\pm$  5 nm, 3 W) at 25 °C for 2 h. Finally, the crude mixture was purified by column chromatography on silica gel (petroleum/ethyl acetate = 20:1 as eluent) to afford product **15** as a white solid, or by column chromatography on silica gel (petroleum/ethyl acetate = 10:1 as eluent) at -20 °C to afford the product **3aa** as a colorless gum.

### d) Decomposition of **3aa**

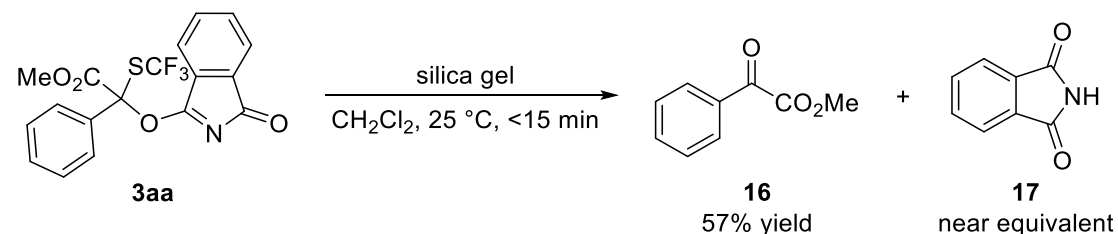

A vial was charged with phosphate **3aa** (0.12 mmol), then CH<sub>2</sub>Cl<sub>2</sub> (0.5 mL) was added. Subsequently, silica gel (200~300 mesh, 20 mg) was added and the mixture was stirred at 25 °C for ~15 min. Finally, the crude mixture was purified by column chromatography on silica gel (petroleum/ethyl acetate = 10:1~0:1 as eluent) to afford  $\alpha$ -keto ester **16** as a yellow oil in 57% yield and phthalimide **17** as a white solid in near quantitative yield.

## (H) UV-vis absorption and fluorescence experiments

### a) UV-vis absorption spectra

The fresh solutions of **1a** (0.5 mM in DCM) and **2a** (0.5 mM in DCM) were prepared and measured by UV-2450 (A10834534597CS). The solution of the mixture of **1a** and **2a** (0.5 mM in DCM) was prepared by mixing equal volumes of **1a** (1.0 mM in DCM) and **2a** (1.0 mM in DCM) *in situ* before measurement.

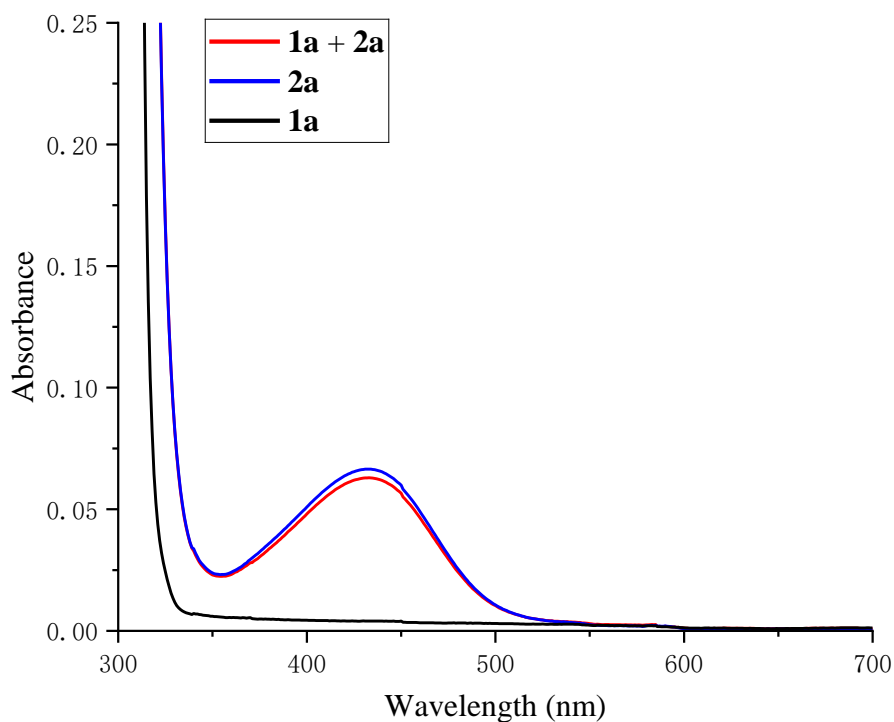

### b) fluorescence spectra

The fresh solution of **2a** (0.5 mM in DCM) was prepared and measured by FL970. The solution of the mixture of **1a** and **2a** (0.5 mM in DCM) was prepared by mixing equal volumes of **1a** (1.0 mM in DCM) and **2a** (1.0 mM in DCM) *in situ* before measurement.

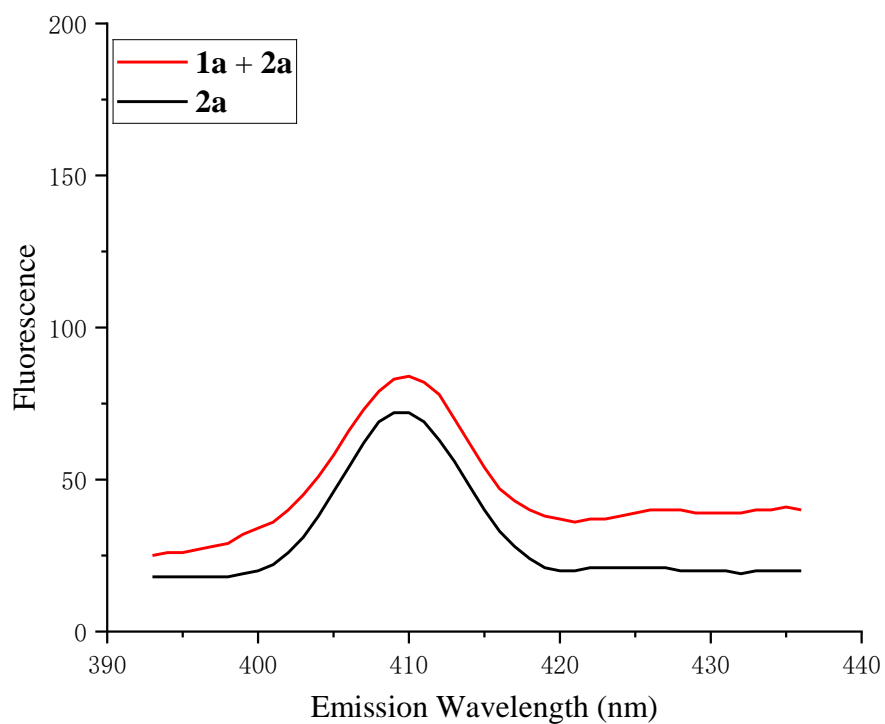

## (I) NMR experiments

All the samples were dissolved in  $\text{CDCl}_3$  and tested.

### a) $^1\text{H}$ spectra of 1a, 2a and the mixture of 1a & 2a

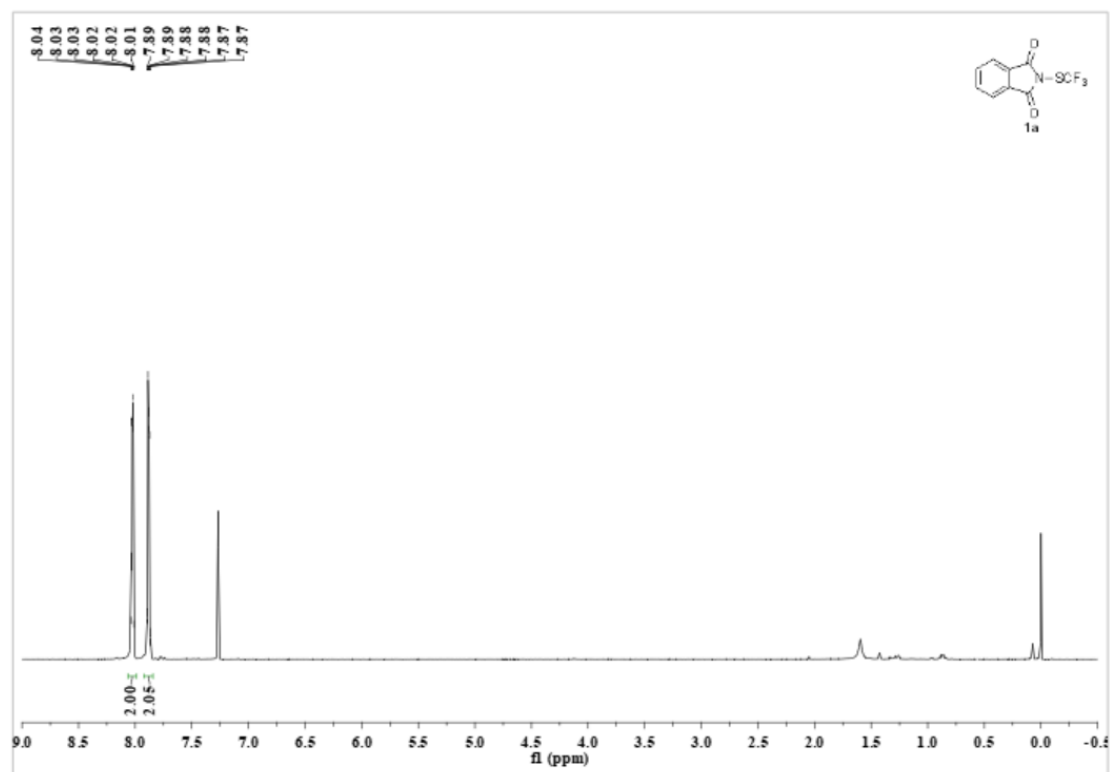

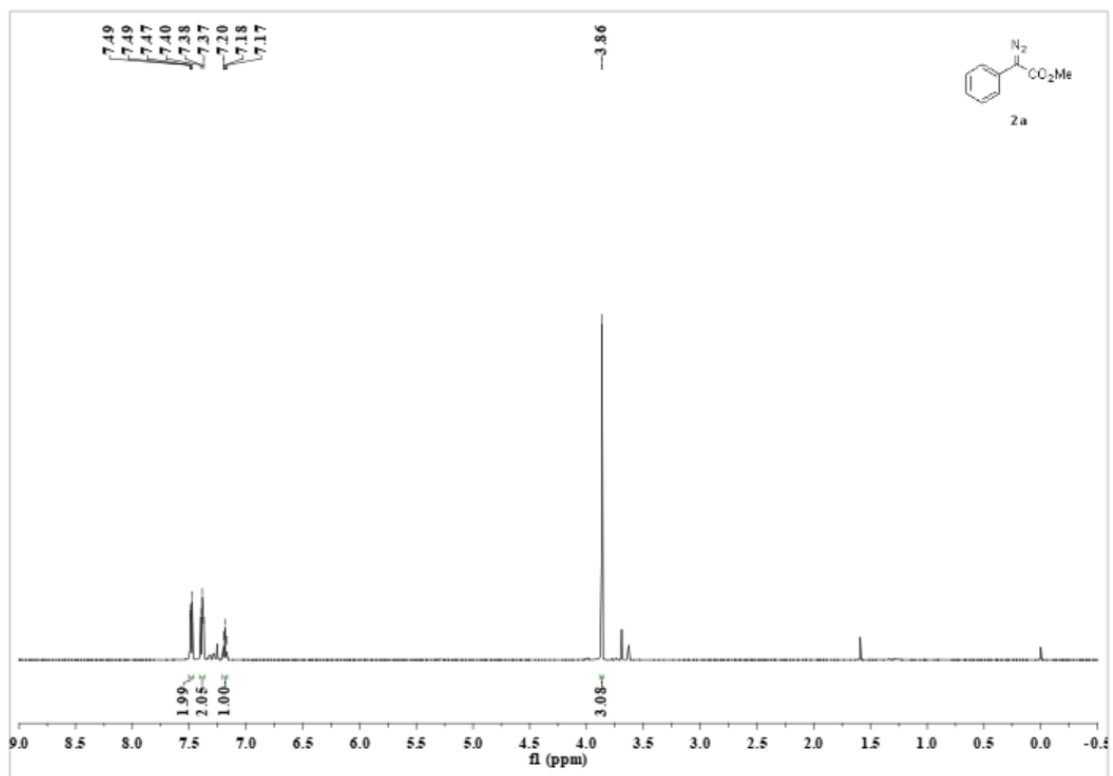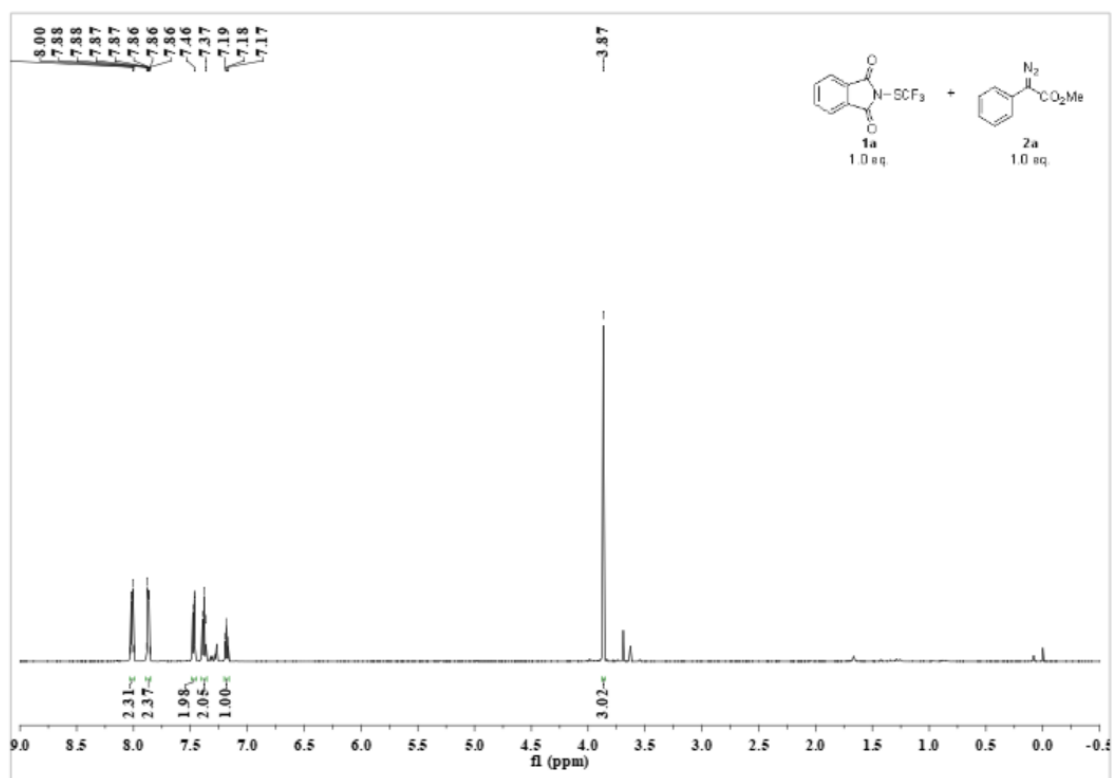

b)  $^{13}\text{C}\{^1\text{H}\}$  spectra of 1a, 2a and the mixture of 1a & 2a

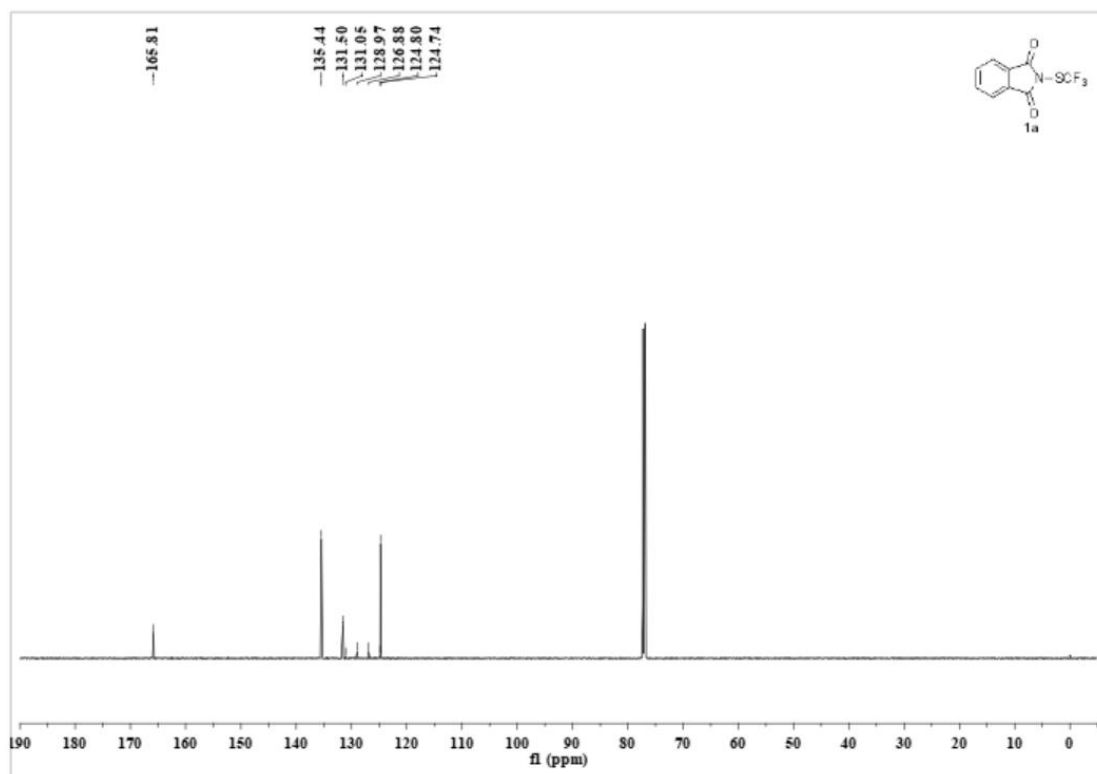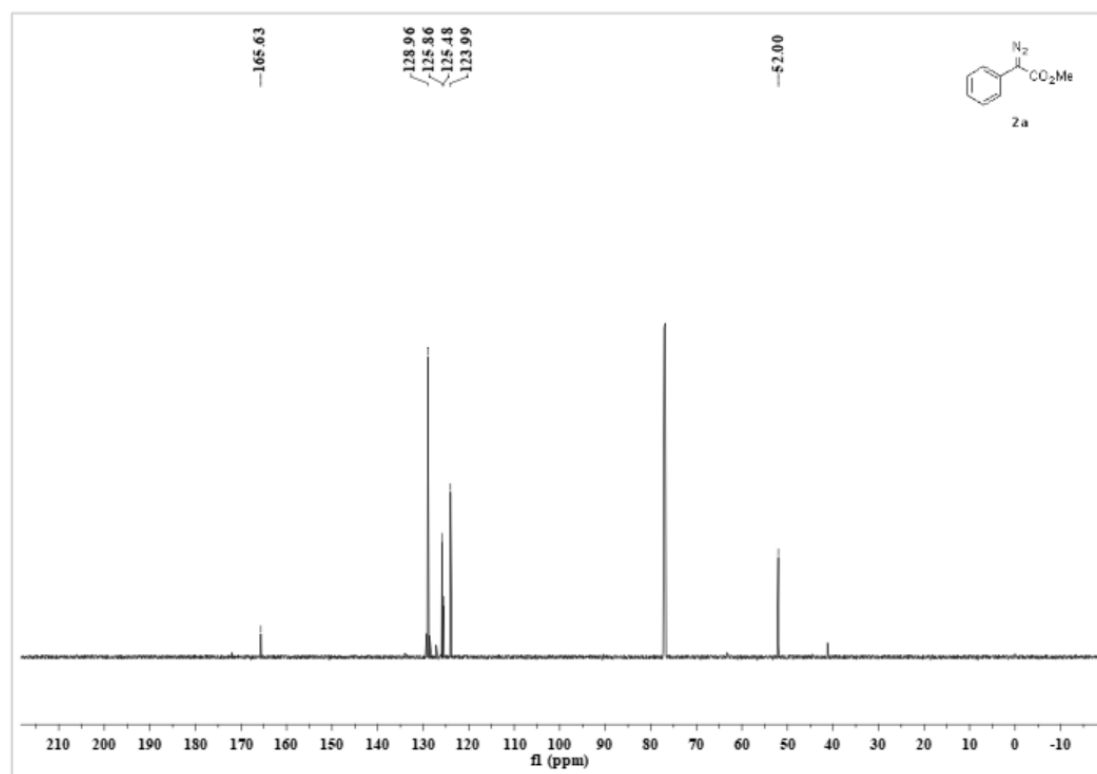

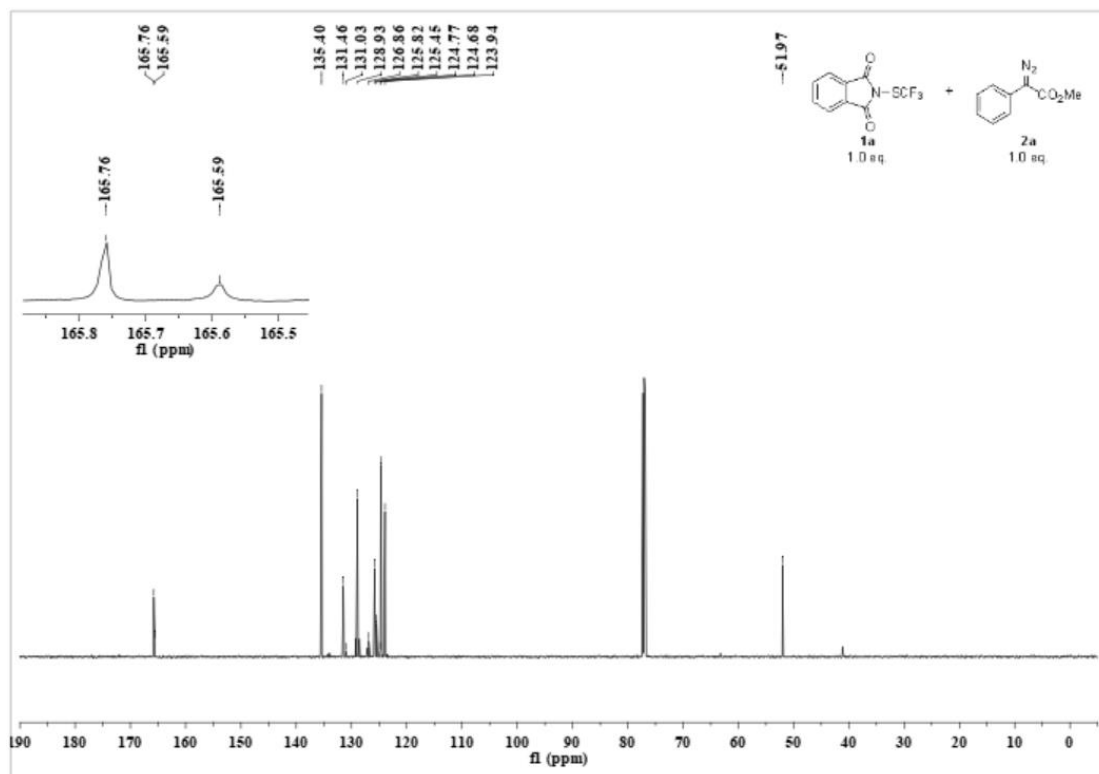

c)  $^{19}\text{F}\{^1\text{H}\}$  spectra of 1a and the mixture of 1a & 2a

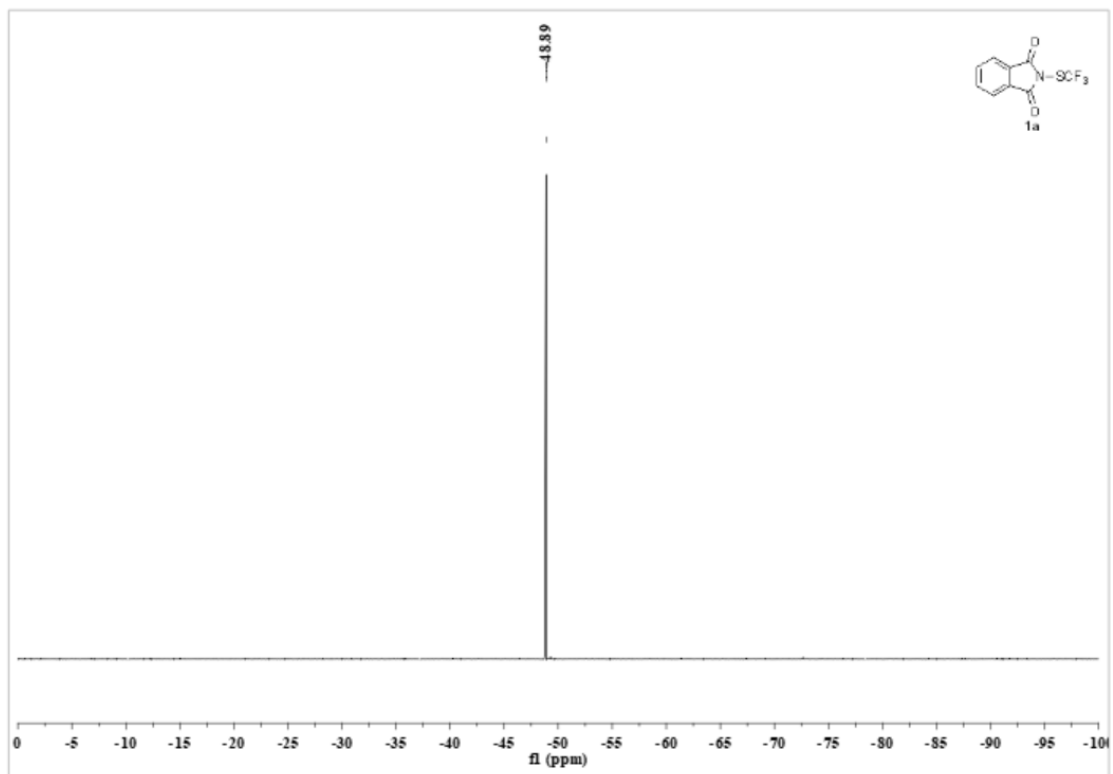

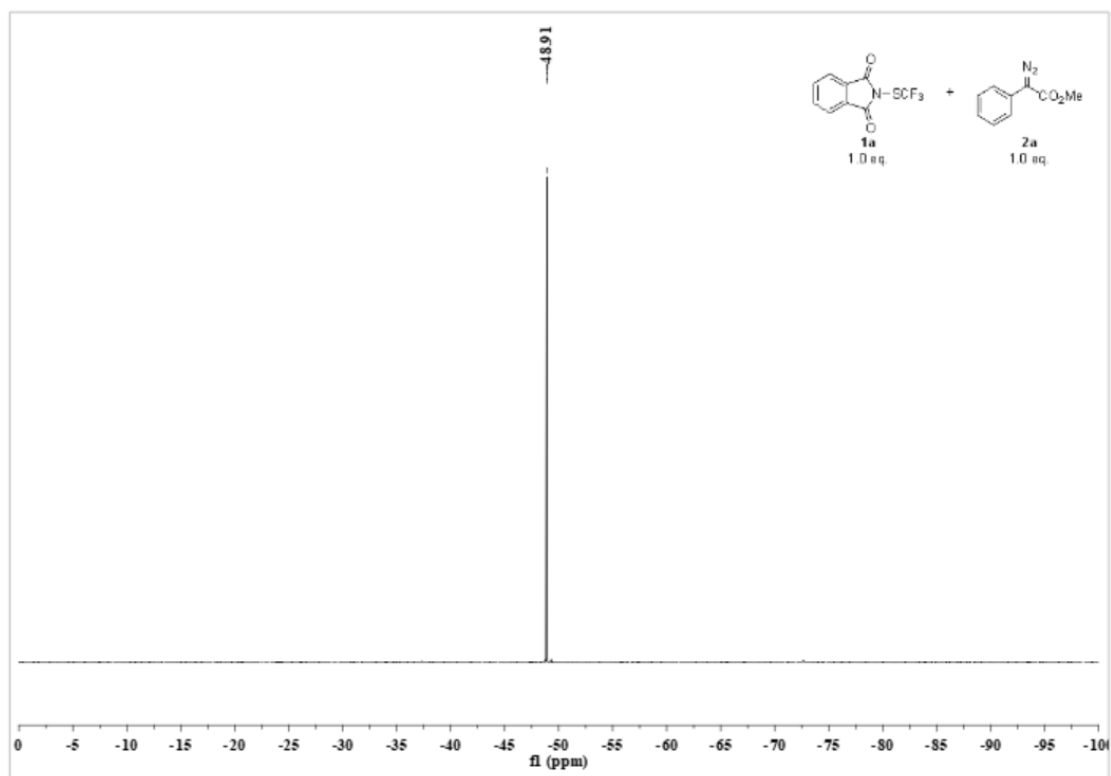

## (J) DFT analysis

### a) Computational details

Geometry optimizations were performed using Gaussian 16<sup>3</sup>, employing the B3LYP functional<sup>4</sup> and 6-31G\*<sup>5</sup> basis set. The geometry optimizations were run with dispersion corrections from Grimme's D3 model<sup>6</sup> with Becke-Johnson damping factors<sup>7</sup>. Harmonic vibrational frequencies calculations were performed to confirm the stationary points as true minima or transition states, as well as to provide thermodynamic corrections to the SCF energies. According to the excited state calculation of TDDFT method, it is found that the wavelength band of 455~465nm corresponds to the second excited state of two carbenes, so the energies of two carbenes are calculated by setting spin multiplicity 1 and 3 respectively with high accuracy scheme. Single point energy calculations were carried out using def2-TZVP<sup>8</sup> basis set, SMD solvation model<sup>9</sup> with dichloromethane as the solvent. The ball and stick structures were created using GaussView 6.1.1<sup>10</sup>. In addition, to correct the Gibbs free energies under pressure of 1 atm to the standard state in solution (1 mol/L), a correction of  $RT \ln(cs/cg)$  (1.89 kcal/mol) is added to energies of all species, cs is the standard molar concentration in solution (1 mol/L), cg is the standard molar concentration in gas phase (0.0446 mol/L), and R is the gas constant. The 3D diagrams of molecules were generated using CYLView<sup>11</sup>.



b) The energies of the excited singlet carbene I and triplet carbene II

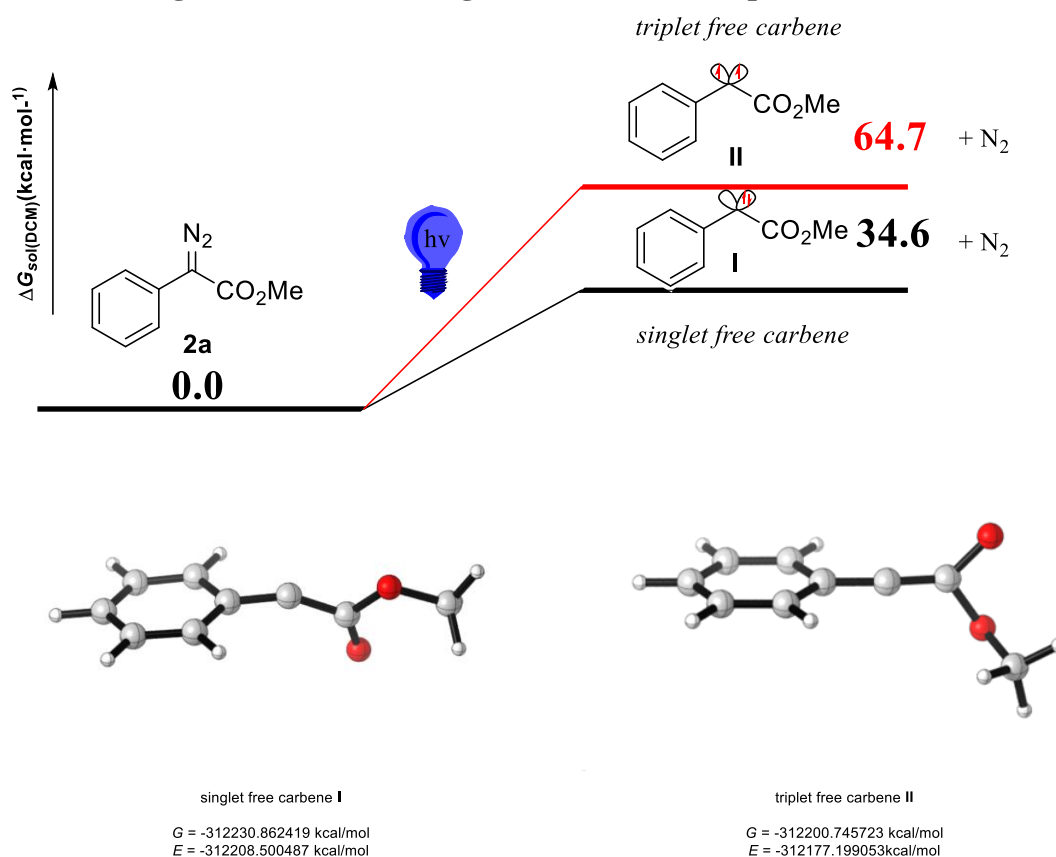

c) Energies and coordinates

Singlet carbene

|   |             |             |             |
|---|-------------|-------------|-------------|
| C | -2.96064100 | -1.15265200 | -0.18526600 |
| C | -1.58016400 | -1.17250700 | -0.33353100 |
| C | -0.80366300 | 0.01861100  | -0.17281800 |
| C | -1.51168100 | 1.22782700  | 0.10126600  |
| C | -2.89549900 | 1.23970400  | 0.19990800  |
| C | -3.62400900 | 0.05181600  | 0.06741000  |
| H | -3.53025300 | -2.07323700 | -0.28548000 |
| H | -1.05601600 | -2.09740800 | -0.54931700 |
| H | -0.93645100 | 2.13906700  | 0.22966900  |
| H | -3.41510200 | 2.17238900  | 0.40384200  |
| H | -4.70598300 | 0.06531800  | 0.16211700  |
| C | 0.58032400  | 0.00415400  | -0.31943000 |
| C | 1.89815400  | -0.11424700 | 0.17520500  |
| O | 2.85267900  | 0.36206000  | -0.67328200 |
| C | 4.20304300  | 0.19017000  | -0.22405600 |
| H | 4.82884000  | 0.42892700  | -1.08508800 |
| H | 4.42789100  | 0.87228400  | 0.60252900  |
| H | 4.38352600  | -0.83612900 | 0.10805200  |
| O | 2.16836700  | -0.66562000 | 1.24347600  |

Thermal correction to Gibbs Free Energy = 0.108399

$$E(\text{DCM}) = -497.679844$$

|                                            |             |                |
|--------------------------------------------|-------------|----------------|
| <b>Temperature</b>                         | 298.150     | Kelvin         |
| <b>Pressure</b>                            | 1.00000     | atm            |
| <b>Frequencies scaled by</b>               | 1.0000      |                |
| <b>Electronic Energy (EE)</b>              | -497.679844 | Hartree        |
| <b>Zero-point Energy Correction</b>        | 0.144035    | Hartree        |
| <b>Thermal Correction to Energy</b>        | 0.153563    | Hartree        |
| <b>Thermal Correction to Enthalpy</b>      | 0.154508    | Hartree        |
| <b>Thermal Correction to Free Energy</b>   | 0.108399    | Hartree        |
| <b>EE + Zero-point Energy</b>              | -497.535809 | Hartree        |
| <b>EE + Thermal Energy Correction</b>      | -497.526280 | Hartree        |
| <b>EE + Thermal Enthalpy Correction</b>    | -497.525336 | Hartree        |
| <b>EE + Thermal Free Energy Correction</b> | -497.571445 | Hartree        |
| <b>E (Thermal)</b>                         | 96.363      | kcal/mol       |
| <b>Heat Capacity (Cv)</b>                  | 35.341      | cal/mol-kelvin |
| <b>Entropy (S)</b>                         | 97.044      | cal/mol-kelvin |

#### Triplet carbene

|   |             |             |             |
|---|-------------|-------------|-------------|
| C | 2.82872900  | 1.24531800  | 0.28028600  |
| C | 1.45374700  | 1.16747200  | 0.42705800  |
| C | 0.74948700  | -0.04301300 | 0.12829800  |
| C | 1.52297400  | -1.15995100 | -0.32797300 |
| C | 2.89702000  | -1.06111100 | -0.47042900 |
| C | 3.56162400  | 0.13686700  | -0.16884600 |
| H | 3.34242000  | 2.17388400  | 0.51522500  |
| H | 0.88374800  | 2.02326100  | 0.77504900  |
| H | 1.00572900  | -2.08577700 | -0.55920300 |
| H | 3.46346800  | -1.92105700 | -0.81823200 |
| H | 4.63971300  | 0.20571900  | -0.28237900 |
| C | -0.61960100 | -0.13057200 | 0.27529300  |
| C | -1.89501100 | -0.42244900 | 0.31962600  |
| O | -2.78718700 | -0.20923900 | -0.75959900 |
| C | -3.54003100 | 1.01346100  | -0.69279800 |
| H | -3.87679200 | 1.19816000  | -1.71595900 |
| H | -4.40754900 | 0.90497700  | -0.03685000 |
| H | -2.90409200 | 1.83604300  | -0.35187600 |
| O | -2.70034700 | -0.89217800 | 1.24099100  |

Thermal correction to Gibbs Free Energy = 0.106166

$$E(\text{DCM}) = -497.629617$$

|                                     |             |                |
|-------------------------------------|-------------|----------------|
| Temperature                         | 298.150     | Kelvin         |
| Pressure                            | 1.00000     | atm            |
| Frequencies scaled by               | 1.0000      |                |
| Electronic Energy (EE)              | -497.629617 | Hartree        |
| Zero-point Energy Correction        | 0.143690    | Hartree        |
| Thermal Correction to Energy        | 0.153981    | Hartree        |
| Thermal Correction to Enthalpy      | 0.154926    | Hartree        |
| Thermal Correction to Free Energy   | 0.106166    | Hartree        |
| EE + Zero-point Energy              | -497.485927 | Hartree        |
| EE + Thermal Energy Correction      | -497.475636 | Hartree        |
| EE + Thermal Enthalpy Correction    | -497.474691 | Hartree        |
| EE + Thermal Free Energy Correction | -497.523451 | Hartree        |
| E (Thermal)                         | 96.625      | kcal/mol       |
| Heat Capacity (Cv)                  | 37.861      | cal/mol-kelvin |
| Entropy (S)                         | 102.623     | cal/mol-kelvin |

### (K) Spectral characterization data for the products

#### Methyl 2-((1-oxo-1*H*-isoindol-3-yl)oxy)-2-phenyl-2-((trifluoromethyl)thio)acetate (3aa)

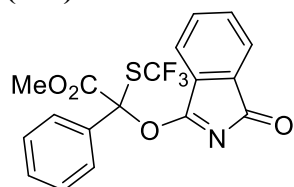

following the general procedure, the reaction mixture was purified by silica gel column chromatography (petroleum/EtOAc = 10:1) at -20 °C to afford **3aa** (76% yield) as a colorless gum.  $^1\text{H NMR}$  (400 MHz,  $\text{CDCl}_3$ )  $^1\text{H NMR}$  (400 MHz,  $\text{CDCl}_3$ )  $\delta$  7.86 (d,  $J$  = 8.0 Hz, 2H), 7.83 – 7.78 (m, 1H), 7.75 – 7.70 (m, 1H), 7.69 – 7.62 (m, 2H), 7.54 – 7.43 (m, 3H), 3.78 (s, 3H).  $^{13}\text{C}\{^1\text{H}\}$  NMR (101 MHz,  $\text{CDCl}_3$ )  $\delta$  182.6, 179.5, 165.8, 135.2, 135.0, 134.6, 133.54, 133.51, 129.9, 128.91 (q,  $J$  = 311.1 Hz), 128.87, 125.7, 124.6, 121.0, 93.4 (q,  $J$  = 2.0 Hz), 54.5.  $^{19}\text{F}\{^1\text{H}\}$  NMR (376 MHz,  $\text{CDCl}_3$ )  $\delta$  -37.3. HRMS (FTMS-ESI) calcd for  $\text{C}_{18}\text{H}_{12}\text{F}_3\text{NNaO}_4\text{S}^+$  ( $[\text{M}+\text{Na}^+]$ ): 418.0331, found: 418.0331.

#### Ethyl 2-((1-oxo-1*H*-isoindol-3-yl)oxy)-2-phenyl-2-((trifluoromethyl)thio)acetate (3ab)

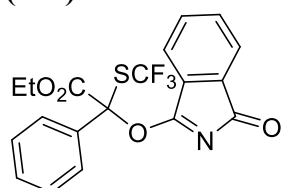

following the general procedure, the reaction mixture was purified by silica gel column chromatography (petroleum/EtOAc = 10:1) at -20 °C to afford **3ab** (72% yield) as a colorless gum.  $^1\text{H NMR}$  (400 MHz,  $\text{CDCl}_3$ )  $\delta$  7.87 (d,  $J$  = 8.0 Hz, 2H), 7.84 – 7.78 (m, 1H), 7.76 – 7.70 (m, 1H), 7.69 – 7.62 (m, 2H), 7.53 – 7.42 (m, 3H), 4.36 – 4.17 (m, 2H), 1.19 (t,  $J$  = 8.0 Hz, 3H).  $^{13}\text{C}\{^1\text{H}\}$

NMR (101 MHz, CDCl<sub>3</sub>)  $\delta$  182.5, 179.5, 165.1, 135.4, 135.25, 135.19, 134.6, 133.5, 129.8, 129.0 (q,  $J = 311.1$  Hz), 128.8, 125.7, 124.5, 121.0, 93.5 (q,  $J = 2.0$  Hz), 64.1, 13.6. <sup>19</sup>F{<sup>1</sup>H} NMR (376 MHz, CDCl<sub>3</sub>)  $\delta$  -37.3. HRMS (FTMS-ESI) calcd for C<sub>19</sub>H<sub>14</sub>F<sub>3</sub>NNaO<sub>4</sub>S<sup>+</sup> ([M+Na<sup>+</sup>]): 432.0488, found: 432.0487.

**Isopropyl 2-((1-oxo-1*H*-isoindol-3-yl)oxy)-2-phenyl-2-((trifluoromethyl)thio)acetate (3ac)**

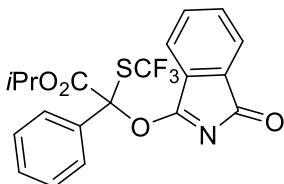

following the general procedure, the reaction mixture was purified by silica gel column chromatography (petroleum/EtOAc = 15:1) at -20 °C to afford **3ac** (71% yield) as a colorless gum. <sup>1</sup>H NMR (400 MHz, CDCl<sub>3</sub>)  $\delta$  7.86 (d,  $J = 8.0$  Hz, 2H), 7.83 – 7.78 (m, 1H), 7.76 – 7.70 (m, 1H), 7.69 – 7.62 (m, 2H), 7.53 – 7.41 (m, 3H), 5.15 – 5.04 (m, 1H), 1.19 (d,  $J = 8.0$  Hz, 3H), 1.16 (d,  $J = 8.0$  Hz, 3H). <sup>13</sup>C{<sup>1</sup>H} NMR (101 MHz, CDCl<sub>3</sub>)  $\delta$  182.4, 179.4, 164.4, 135.4, 135.2, 134.6, 133.4, 129.7, 129.0 (q,  $J = 311.1$  Hz), 128.7, 125.6, 124.5, 121.0, 93.6 (d,  $J = 1.0$  Hz), 72.6, 21.2, 21.1. <sup>19</sup>F{<sup>1</sup>H} NMR (376 MHz, CDCl<sub>3</sub>)  $\delta$  -37.4. HRMS (FTMS-ESI) calcd for C<sub>20</sub>H<sub>16</sub>F<sub>3</sub>NNaO<sub>4</sub>S<sup>+</sup> ([M+Na<sup>+</sup>]): 446.0644, found: 446.0636.

***tert*-Butyl 2-((1-oxo-1*H*-isoindol-3-yl)oxy)-2-phenyl-2-((trifluoromethyl)thio)acetate (3ad)**

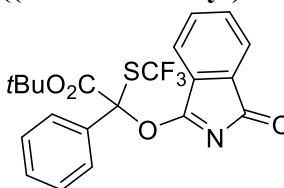

following the general procedure, the reaction mixture was purified by silica gel column chromatography (petroleum/EtOAc = 15:1) at -20 °C to afford **3ad** (36% yield) as a colorless gum. <sup>1</sup>H NMR (400 MHz, CDCl<sub>3</sub>)  $\delta$  7.85 (d,  $J = 8.0$  Hz, 2H), 7.83 – 7.78 (m, 1H), 7.74 – 7.69 (m, 1H), 7.68 – 7.61 (m, 2H), 7.52 – 7.41 (m, 3H), 1.41 (s, 9H). <sup>13</sup>C{<sup>1</sup>H} NMR (101 MHz, CDCl<sub>3</sub>)  $\delta$  182.4, 179.6, 163.5, 135.9, 135.3, 134.8, 133.39, 133.38, 129.6, 129.1 (q,  $J = 311.1$  Hz), 128.7, 125.6, 124.4, 121.0, 93.8, 86.2, 27.5. <sup>19</sup>F{<sup>1</sup>H} NMR (376 MHz, CDCl<sub>3</sub>)  $\delta$  -37.5. HRMS (FTMS-ESI) calcd for C<sub>21</sub>H<sub>18</sub>F<sub>3</sub>NNaO<sub>4</sub>S<sup>+</sup> ([M+Na<sup>+</sup>]): 460.0801, found: 460.0788.

**Benzyl 2-((1-oxo-1*H*-isoindol-3-yl)oxy)-2-phenyl-2-((trifluoromethyl)thio)acetate (3ae)**

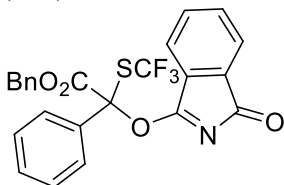

following the general procedure, the reaction mixture was purified by silica gel column chromatography (petroleum/EtOAc = 10:1) at -20 °C to afford **3ae** (74% yield) as a colorless gum. <sup>1</sup>H NMR (400 MHz, CDCl<sub>3</sub>)  $\delta$  7.89 – 7.83 (m, 2H), 7.83 – 7.78 (m, 1H), 7.75 – 7.69 (m, 1H), 7.69 – 7.62 (m, 2H), 7.54 – 7.42 (m, 3H), 7.30 – 7.21 (m, 3H), 7.14 (d,  $J = 8.0$  Hz, 2H), 5.22 (dd,  $J = 16.0, 12.0$  Hz, 2H). <sup>13</sup>C{<sup>1</sup>H} NMR (101 MHz, CDCl<sub>3</sub>)  $\delta$  182.4, 179.3, 165.0, 135.4, 135.0 (d,  $J = 9.1$  Hz), 134.6, 134.0, 133.5 (d,  $J = 4.0$  Hz), 129.9, 129.0 (q,  $J = 311.1$  Hz), 128.8, 128.6, 128.5, 128.2, 125.8, 124.7, 124.5, 121.0, 93.6 (d,  $J = 2.0$  Hz), 69.3. <sup>19</sup>F{<sup>1</sup>H} NMR (376 MHz, CDCl<sub>3</sub>)  $\delta$  -37.2. HRMS (FTMS-ESI) calcd for C<sub>24</sub>H<sub>17</sub>F<sub>3</sub>NO<sub>4</sub>S<sup>+</sup> ([M+H<sup>+</sup>]): 472.0825, found: 472.0814.

**Allyl 2-((1-oxo-1*H*-isoindol-3-yl)oxy)-2-phenyl-2-((trifluoromethyl)thio)acetate (3af)**

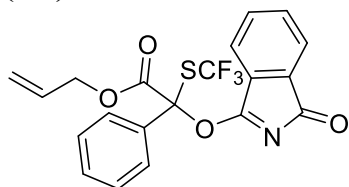

following the general procedure, the reaction mixture was purified by silica gel column chromatography (petroleum/EtOAc = 10:1) at -20 °C to afford **3af** (58% yield) as a colorless gum. <sup>1</sup>H NMR (400 MHz, CDCl<sub>3</sub>) δ 7.88 (d, *J* = 8.0 Hz, 2H), 7.84 – 7.78 (m, 1H), 7.76 – 7.70 (m, 1H), 7.69 – 7.62 (m, 2H), 7.55 – 7.42 (m, 3H), 5.86 – 5.68 (m, 1H), 5.21 – 5.10 (m, 2H), 4.68 (d, *J* = 4.0 Hz, 2H). <sup>13</sup>C{<sup>1</sup>H} NMR (101 MHz, CDCl<sub>3</sub>) δ 182.5, 179.4, 164.9, 135.4, 135.1 (d, *J* = 6.1 Hz), 134.6, 133.5 (d, *J* = 3.0 Hz), 130.3, 129.9, 128.9 (q, *J* = 311.1 Hz), 128.8, 125.8, 124.7, 124.5, 121.0, 119.7, 93.5 (q, *J* = 2.0 Hz), 68.2. <sup>19</sup>F{<sup>1</sup>H} NMR (376 MHz, CDCl<sub>3</sub>) δ -37.3. HRMS (FTMS-ESI) calcd for C<sub>20</sub>H<sub>15</sub>F<sub>3</sub>NO<sub>4</sub>S<sup>+</sup> ([M+H<sup>+</sup>]): 422.0668, found: 422.0661.

**(1*R*,2*S*,5*R*)-2-Isopropyl-5-methylcyclohexyl 2-((1-oxo-1*H*-isoindol-3-yl)oxy)-2-phenyl-2-((trifluoromethyl)thio)acetate (3ag)**

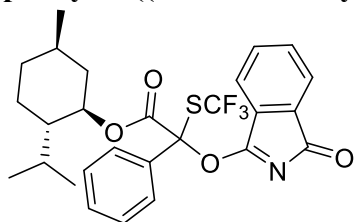

following the general procedure, the reaction mixture was purified by silica gel column chromatography (petroleum/EtOAc = 15:1) at -20 °C to afford **3ag** (73% yield, 1:1 dr) as a colorless gum. <sup>1</sup>H NMR (400 MHz, CDCl<sub>3</sub>) δ 7.90 – 7.83 (m, 4H), 7.83 – 7.77 (m, 2H), 7.76 – 7.70 (m, 2H), 7.69 – 7.61 (m, 4H), 7.53 – 7.40 (m, 6H), 4.78 – 4.70 (m, 1H) [4.70 – 4.62 (m, 1H)], 2.02 (d, *J* = 12.0 Hz, 1H) [1.94 (d, *J* = 12.0 Hz, 1H)], 1.63 – 1.52 (m, 5H), 1.45 – 1.36 (m, 2H), 1.35 – 1.18 (m, 3H), 1.18 – 1.08 (m, 1H), 0.96 (d, *J* = 8.0 Hz, 1H), 0.94 – 0.86 (m, 1H), 0.84 (d, *J* = 8.0 Hz, 6H), 0.78 (d, *J* = 12.0 Hz, 1H), 0.76 – 0.68 (m, 2H), 0.65 (d, *J* = 8.0 Hz, 3H), 0.61 (d, *J* = 8.0 Hz, 3H) [0.59 (d, *J* = 8.0 Hz, 3H), 0.44 (d, *J* = 4.0 Hz, 3H)]. <sup>13</sup>C{<sup>1</sup>H} NMR (101 MHz, CDCl<sub>3</sub>) δ 182.4 [182.2], 179.3 [179.1], 164.6, 135.57 [135.56], 135.20 [135.17], 134.72 [134.70], 133.43, 133.40, 129.7 [129.6], 129.10 (q, *J* = 310.1 Hz) [129.06 (q, *J* = 310.1 Hz)], 128.7 [128.6], 125.7 [125.6], 124.5 [124.4], 121.00 [120.96], 93.9 [93.8], 79.2 [78.5], 47.0 [46.6], 39.6 [39.0], 34.0 [33.9], 31.32 [31.26], 25.8 [25.3], 23.0 [20.6], 22.8 [20.4], 21.84 [21.81], 15.7 [15.4]. <sup>19</sup>F{<sup>1</sup>H} NMR (376 MHz, CDCl<sub>3</sub>) δ -37.26 [-37.30]. HRMS (FTMS-ESI) calcd for C<sub>27</sub>H<sub>28</sub>F<sub>3</sub>NNaO<sub>4</sub>S<sup>+</sup> ([M+Na<sup>+</sup>]): 542.1583, found: 542.1589. (Note: **3ag** is a mixture of two inseparable diastereomers, so there are two sets of peaks on <sup>1</sup>H, <sup>13</sup>C and <sup>19</sup>F spectra. On the <sup>1</sup>H spectrum, most of the peaks of the two diastereomers could not be well distinguished, which were integrated together, except for the methyl of isopropyl group and the hydrogen of the tertiary carbon linked to the oxygen atom, so the total number of hydrogen doubled. For <sup>1</sup>H, <sup>13</sup>C and <sup>19</sup>F spectra, the peaks in the square brackets belong to the diastereomer.)

**Methyl 2-(2-fluorophenyl)-2-((1-oxo-1*H*-isoindol-3-yl)oxy)-2-((trifluoromethyl)thio)acetate (3ah)**

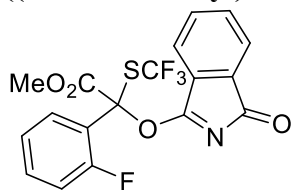

following the general procedure, the reaction mixture was purified by silica gel column chromatography (petroleum/EtOAc = 10:1) at -20 °C to afford **3ah** (39% yield) as a colorless gum. <sup>1</sup>H NMR (400 MHz, CDCl<sub>3</sub>) δ 7.93 (td, *J* = 7.6, 1.6 Hz, 1H), 7.90 – 7.85 (m, 1H), 7.81 – 7.73 (m, 1H), 7.69 – 7.60 (m, 2H), 7.31 (td, *J* = 7.6, 0.8 Hz, 2H), 7.21 – 7.13 (m, 2H), 3.97 (s, 3H). <sup>13</sup>C{<sup>1</sup>H} NMR (101 MHz, CDCl<sub>3</sub>) δ 183.8, 167.8, 164.4, 162.8 (d, *J* = 258.6 Hz), 136.9, 136.8, 134.4, 132.6, 130.9 (d, *J* = 1.4 Hz), 129.1 (q, *J* = 293.9 Hz), 124.9 (d, *J* = 4.0 Hz), 123.6, 121.8 (d, *J* = 11.1 Hz), 116.6 (d, *J* = 21.2 Hz), 93.1, 53.0. <sup>19</sup>F NMR (376 MHz, CDCl<sub>3</sub>) δ -31.1, -111.6. HRMS (FTMS-ESI) calcd for C<sub>18</sub>H<sub>11</sub>F<sub>4</sub>NNaO<sub>4</sub>S<sup>+</sup> ([M+Na<sup>+</sup>]): 436.0237, found: 436.0243.

**Methyl 2-(3-fluorophenyl)-2-((1-oxo-1*H*-isoindol-3-yl)oxy)-2-((trifluoromethyl)thio)acetate (3ai)**

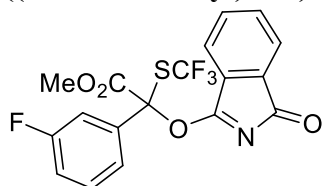

following the general procedure, the reaction mixture was purified by silica gel column chromatography (petroleum/EtOAc = 10:1) at -20 °C to afford **3ai** (<44% yield) as a colorless gum. <sup>1</sup>H NMR (400 MHz, CDCl<sub>3</sub>) δ 7.84 – 7.80 (m, 1H), 7.74 – 7.70 (m, 1H), 7.68 – 7.62 (m, 3H), 7.61 – 7.56 (m, 1H), 7.51 – 7.44 (m, 1H), 7.16 (td, *J* = 12.0, 4.0 Hz, 1H), 3.80 (s, 3H). <sup>13</sup>C{<sup>1</sup>H} NMR (101 MHz, CDCl<sub>3</sub>) δ 182.4, 179.3, 165.4, 162.8 (d, *J* = 248.5 Hz), 135.0, 134.6, 134.4, 133.6 (d, *J* = 6.1 Hz), 130.6 (d, *J* = 8.1 Hz), 128.8 (q, *J* = 311.1 Hz), 126.1 (d, *J* = 4.0 Hz), 124.7, 123.6, 121.0, 117.0 (d, *J* = 21.2 Hz), 113.2 (d, *J* = 25.2 Hz), 93.6 (d, *J* = 3.0 Hz), 54.7. <sup>19</sup>F{<sup>1</sup>H} NMR (376 MHz, CDCl<sub>3</sub>) δ -37.3, -110.9. HRMS (FTMS-ESI) calcd for C<sub>18</sub>H<sub>11</sub>F<sub>4</sub>NNaO<sub>4</sub>S<sup>+</sup> ([M+Na<sup>+</sup>]): 436.0237, found: 436.0239. (Note: According to the NMR, there should be a small amount of impurity in the product **3ai**, which was hard to be separated and identified.)

**Methyl 2-(4-fluorophenyl)-2-((1-oxo-1*H*-isoindol-3-yl)oxy)-2-((trifluoromethyl)thio)acetate (3aj)**

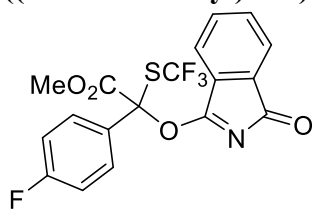

following the general procedure, the reaction mixture was purified by silica gel column chromatography (petroleum/EtOAc = 10:1) at -20 °C to afford **3aj** (40% yield) as a colorless gum. <sup>1</sup>H NMR (400 MHz, CDCl<sub>3</sub>) δ 7.89 – 7.79 (m, 3H), 7.72 – 7.63 (m, 3H), 7.22 – 7.14 (m, 2H), 3.79 (s, 3H). <sup>13</sup>C{<sup>1</sup>H} NMR (101 MHz, CDCl<sub>3</sub>) δ 182.5, 179.3, 165.6, 163.4 (d, *J* = 251.5 Hz), 135.0, 134.6, 133.63, 133.55, 130.9 (d, *J* = 3.0 Hz), 128.9 (q, *J* = 311.1 Hz), 128.0 (d, *J* = 9.1 Hz), 124.7, 121.0, 116.0 (d, *J* = 22.2 Hz), 93.1, 54.6. <sup>19</sup>F{<sup>1</sup>H} NMR (376 MHz, CDCl<sub>3</sub>) δ -37.3, -110.8. HRMS (FTMS-ESI) calcd for C<sub>18</sub>H<sub>11</sub>F<sub>4</sub>NNaO<sub>4</sub>S<sup>+</sup> ([M+Na<sup>+</sup>]): 436.0237, found: 436.0243.

**Methyl 2-(4-chlorophenyl)-2-((1-oxo-1H-isoindol-3-yl)oxy)-2-((trifluoromethyl)thio)acetate (3ak)**

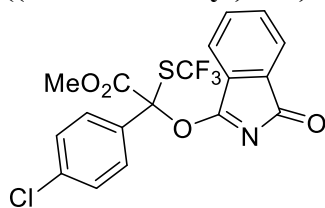

following the general procedure, the reaction mixture was purified by silica gel column chromatography (petroleum/EtOAc = 10:1) at -20 °C to afford **3ak** (79% yield) as a white solid, mp: 136 – 138 °C. <sup>1</sup>H NMR (400 MHz, CDCl<sub>3</sub>) δ 7.84 – 7.77 (m, 3H), 7.72 – 7.64 (m, 3H), 7.50 – 7.44 (m, 2H), 3.78 (s, 3H). <sup>13</sup>C {<sup>1</sup>H} NMR (101 MHz, CDCl<sub>3</sub>) δ 182.4, 179.3, 165.5, 136.2, 135.0, 134.6, 133.7, 133.64, 133.57, 129.2, 128.8 (q, *J* = 311.1 Hz), 127.2, 124.7, 121.0, 93.0 (d, *J* = 2.0 Hz), 54.6. <sup>19</sup>F {<sup>1</sup>H} NMR (376 MHz, CDCl<sub>3</sub>) δ -37.2. HRMS (FTMS-ESI) calcd for C<sub>18</sub>H<sub>11</sub>ClF<sub>3</sub>NNaO<sub>4</sub>S<sup>+</sup> ([M+Na<sup>+</sup>]): 451.9942, 453.9912, found: 451.9946, 453.9913.

**Methyl 2-(4-bromophenyl)-2-((1-oxo-1H-isoindol-3-yl)oxy)-2-((trifluoromethyl)thio)acetate (3al)**

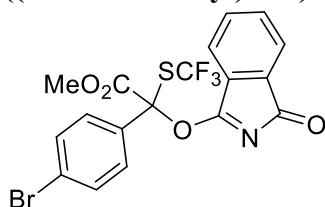

following the general procedure, the reaction mixture was purified by silica gel column chromatography (petroleum/EtOAc = 10:1) at -20 °C to afford **3al** (71% yield) as a colorless gum. <sup>1</sup>H NMR (400 MHz, CDCl<sub>3</sub>) δ 7.84 – 7.79 (m, 1H), 7.76 – 7.72 (m, 2H), 7.72 – 7.65 (m, 3H), 7.65 – 7.61 (m, 2H), 3.78 (s, 3H). <sup>13</sup>C {<sup>1</sup>H} NMR (101 MHz, CDCl<sub>3</sub>) δ 182.4, 179.2, 165.4, 135.0, 134.6, 134.3, 133.64, 133.57, 132.1, 128.8 (q, *J* = 311.1 Hz), 127.5, 124.7, 124.4, 121.0, 93.0 (d, *J* = 1.0 Hz), 54.6. <sup>19</sup>F {<sup>1</sup>H} NMR (376 MHz, CDCl<sub>3</sub>) δ -37.2. HRMS (FTMS-ESI) calcd for C<sub>18</sub>H<sub>11</sub>BrF<sub>3</sub>NNaO<sub>4</sub>S<sup>+</sup> ([M+Na<sup>+</sup>]): 495.9436, 497.9416, found: 495.9443, 497.9421.

**Methyl 2-(4-acetoxyphenyl)-2-((1-oxo-1H-isoindol-3-yl)oxy)-2-((trifluoromethyl)thio)acetate (3am)**

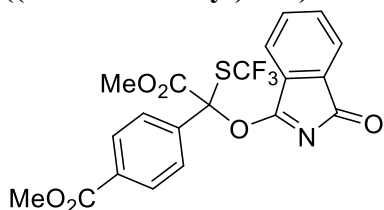

following the general procedure, the reaction mixture was purified by silica gel column chromatography (petroleum/EtOAc = 6:1) at -20 °C to afford **3am** (<38% yield) as a colorless gum. <sup>1</sup>H NMR (400 MHz, CDCl<sub>3</sub>) δ 8.16 (d, *J* = 8.0 Hz, 2H), 7.95 (d, *J* = 8.0 Hz, 2H), 7.86 – 7.80 (m, 1H), 7.76 – 7.71 (m, 1H), 7.71 – 7.63 (m, 2H), 3.96 (s, 3H), 3.79 (s, 3H). <sup>13</sup>C {<sup>1</sup>H} NMR (101 MHz, CDCl<sub>3</sub>) δ 182.4, 179.2, 166.2, 165.3, 139.7, 134.9, 134.6, 133.7, 133.6, 131.6, 130.1, 128.4 (d, *J* = 246.4 Hz), 125.9, 124.7, 121.1, 93.0 (d, *J* = 1.0 Hz), 54.7, 52.5. <sup>19</sup>F {<sup>1</sup>H} NMR (376 MHz, CDCl<sub>3</sub>) δ -37.2. HRMS (FTMS-ESI) calcd for C<sub>20</sub>H<sub>14</sub>F<sub>3</sub>NNaO<sub>6</sub>S<sup>+</sup> ([M+Na<sup>+</sup>]): 476.0386, found: 476.0384.

**Methyl 2-(4-methoxyphenyl)-2-((1-oxo-1*H*-isoindol-3-yl)oxy)-2-((trifluoromethyl)thio)acetate (3an)**

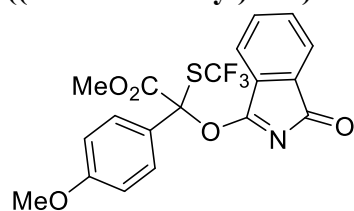

following the general procedure, the reaction mixture was purified by silica gel column chromatography (petroleum/EtOAc = 5:1) at -20 °C to afford **3an** (22% yield) as a colorless oil. <sup>1</sup>H NMR (400 MHz, CDCl<sub>3</sub>) δ 7.91 – 7.85 (m, 2H), 7.81 – 7.77 (m, 2H), 7.74 (d, *J* = 8.0 Hz, 2H), 6.92 (d, *J* = 8.0 Hz, 2H), 3.84 (s, 3H), 3.77 (s, 3H). <sup>13</sup>C{<sup>1</sup>H} NMR (101 MHz, CDCl<sub>3</sub>) δ 189.1, 181.1, 166.2, 160.4, 134.8, 131.45, 131.42, 130.78, 129.8, 129.0 (d, *J* = 341.4 Hz), 123.93, 123.90, 123.6, 113.5, 91.7, 55.33, 54.32. <sup>19</sup>F{<sup>1</sup>H} NMR (376 MHz, CDCl<sub>3</sub>) δ -37.9. HRMS (FTMS-ESI) calcd for C<sub>19</sub>H<sub>14</sub>F<sub>3</sub>NNaO<sub>5</sub>S<sup>+</sup> ([M+Na<sup>+</sup>]): 448.0437, found: 448.0444.

**Methyl 2-(naphthalen-2-yl)-2-((1-oxo-1*H*-isoindol-3-yl)oxy)-2-((trifluoromethyl)thio)acetate (3ao)**

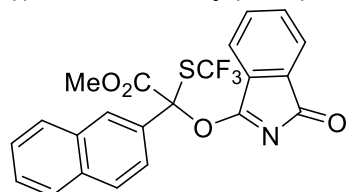

following the general procedure, the reaction mixture was purified by silica gel column chromatography (petroleum/EtOAc = 10:1) at -20 °C to afford **3an** (60% yield) as a colorless oil. <sup>1</sup>H NMR (400 MHz, CDCl<sub>3</sub>) δ 8.57 (s, 1H), 8.06 (d, *J* = 12.0 Hz, 1H), 7.99 (d, *J* = 8.0 Hz, 1H), 7.96 – 7.89 (m, 2H), 7.88 – 7.86 (m, 2H), 7.79 – 7.73 (m, 2H), 7.66 (t, *J* = 8.0 Hz, 1H), 7.59 (t, *J* = 8.0 Hz, 1H), 4.04 (s, 3H). <sup>13</sup>C{<sup>1</sup>H} NMR (101 MHz, CDCl<sub>3</sub>) δ 186.0, 167.9, 164.2, 136.4, 134.4, 133.6, 132.7, 132.3, 130.1, 129.8, 129.6, 129.3 (d, *J* = 309.1 Hz), 129.0, 128.0, 127.2, 124.0, 123.6, 90.5, 52.9. <sup>19</sup>F{<sup>1</sup>H} NMR (376 MHz, CDCl<sub>3</sub>) δ -31.1. HRMS (FTMS-ESI) calcd for C<sub>22</sub>H<sub>14</sub>F<sub>3</sub>NNaO<sub>4</sub>S<sup>+</sup> ([M+Na<sup>+</sup>]): 468.0488, found: 468.0490.

**Methyl 2-((1-oxo-1*H*-isoindol-3-yl)oxy)-2-(thiophen-3-yl)-2-((trifluoromethyl)thio)acetate (3ap)**

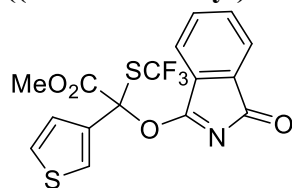

following the general procedure, the reaction mixture was purified by silica gel column chromatography (petroleum/EtOAc = 10:1) at -20 °C to afford **3ao** (39% yield) as a yellow oil. <sup>1</sup>H NMR (400 MHz, CDCl<sub>3</sub>) δ 8.58 (d, *J* = 1.2 Hz, 1H), 7.91 – 7.83 (m, 2H), 7.80 – 7.73 (m, 2H), 7.70 (d, *J* = 4.0 Hz, 1H), 7.39 – 7.34 (m, 1H), 3.96 (s, 3H). <sup>13</sup>C{<sup>1</sup>H} NMR (101 MHz, CDCl<sub>3</sub>) δ 177.7, 167.8, 162.7, 138.0, 137.6, 134.4, 132.7, 131.5 (d, *J* = 307.0 Hz), 127.9, 126.7, 123.6, 85.5, 53.0. <sup>19</sup>F{<sup>1</sup>H} NMR (376 MHz, CDCl<sub>3</sub>) δ -31.1. HRMS (FTMS-ESI) calcd for C<sub>16</sub>H<sub>10</sub>F<sub>3</sub>NNaO<sub>4</sub>S<sub>2</sub><sup>+</sup> ([M+Na<sup>+</sup>]): 423.9896, found: 423.9903.

**Methyl 2-((2-oxo-3,4-dihydro-2*H*-pyrrol-5-yl)oxy)-2-phenyl-2-((trifluoromethyl)thio)acetate (3ba)**

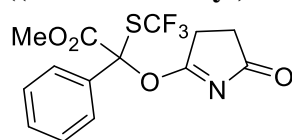

following the general procedure, the reaction mixture was purified by silica gel column chromatography (petroleum/EtOAc = 10:1) at -20 °C to afford **3ba** (75% yield) as a colorless gum. <sup>1</sup>H NMR (400 MHz, CDCl<sub>3</sub>) δ 7.78 – 7.73



(m, 2H), 7.48 – 7.39 (m, 3H), 3.75 (s, 3H), 3.12 – 3.01 (m, 1H), 2.97 – 2.88 (m, 1H), 2.83 – 2.78 (m, 2H).  $^{13}\text{C}\{^1\text{H}\}$  NMR (101 MHz,  $\text{CDCl}_3$ )  $\delta$  192.1, 189.8, 165.7, 135.0, 129.8, 129.0 (q,  $J = 311.1$  Hz), 128.8, 125.7, 93.4, 54.4, 32.2, 29.6.  $^{19}\text{F}\{^1\text{H}\}$  NMR (376 MHz,  $\text{CDCl}_3$ )  $\delta$  -37.5. HRMS (FTMS-ESI) calcd for  $\text{C}_{14}\text{H}_{12}\text{F}_3\text{NNaO}_4\text{S}^+$  ( $[\text{M}+\text{Na}^+]$ ): 370.0331, found: 370.0338.

#### Methyl 2-(1,3-dioxoisindolin-2-yl)-2-(methylthio)-2-phenylacetate (5aa)

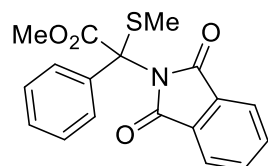

following the general procedure, the reaction mixture was purified by silica gel column chromatography (petroleum/EtOAc = 8:1) to afford **5aa** (60% yield) as a colorless gum.  $^1\text{H}$  NMR (400 MHz,  $\text{CDCl}_3$ )  $\delta$  7.89 – 7.82 (m, 2H), 7.80 – 7.75 (m, 2H), 7.72 (d,  $J = 8.0$  Hz, 2H), 7.42 – 7.31 (m, 3H), 3.79 (s, 3H), 2.10 (s, 3H).  $^{13}\text{C}\{^1\text{H}\}$  NMR (101 MHz,  $\text{CDCl}_3$ )  $\delta$  167.7, 167.1, 134.5, 134.1, 131.4, 128.6, 128.22, 128.18, 123.7, 73.1, 53.6, 14.8. HRMS (FTMS-ESI) calcd for  $\text{C}_{18}\text{H}_{16}\text{NO}_4\text{S}^+$  ( $[\text{M}+\text{H}^+]$ ): 342.0795, found: 342.0786.

#### (2R,3R)/(2S,3S)-Methyl 1,2,3-triphenylcyclopropane-1-carboxylate (15)

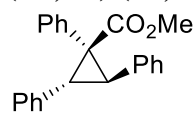

$^1\text{H}$  NMR (400 MHz,  $\text{CDCl}_3$ )  $\delta$  7.49 (d,  $J = 8.0$  Hz, 2H), 7.38 (t,  $J = 8.0$  Hz, 2H), 7.31 (d,  $J = 8.0$  Hz, 1H), 7.25 – 7.18 (m, 5H), 7.16 – 7.09 (m, 3H), 6.97 (d,  $J = 8.0$  Hz, 2H), 3.88 (d,  $J = 8.0$  Hz, 1H), 3.57 (d,  $J = 8.0$  Hz, 1H), 3.40 (s, 3H).  $^{13}\text{C}$  NMR (101 MHz,  $\text{CDCl}_3$ )  $\delta$  170.9, 136.4, 136.3, 135.7, 131.3, 129.0, 128.3, 128.2, 128.0, 127.9, 127.2, 127.1, 126.4, 52.4, 46.0, 36.8, 34.8. This compound is known and the characterization is in consistence with the reported literature.<sup>12</sup>

#### Methyl 2-oxo-2-phenylacetate (16)

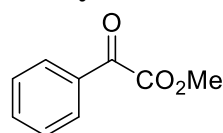

$^1\text{H}$  NMR (400 MHz,  $\text{CDCl}_3$ )  $\delta$  8.05 – 7.99 (m, 2H), 7.71 – 7.63 (m, 1H), 7.55 – 7.49 (m, 2H), 3.99 (s, 3H).  $^{13}\text{C}\{^1\text{H}\}$  NMR (101 MHz,  $\text{CDCl}_3$ )  $\delta$  186.1, 164.1, 135.0, 132.4, 130.1, 128.9, 52.8. This compound is known and the characterization is in consistence with the reported literature.<sup>13</sup>

#### Isoindoline-1,3-dione (17)

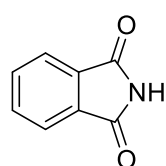

$^1\text{H}$  NMR (400 MHz, DMSO- $d_6$ )  $\delta$  11.29 (s, 1H), 7.77 (s, 4H). This compound is known and the characterization is in consistence with the reported literature.<sup>14</sup>

#### (E)-Dimethyl 2,3-diphenylfumarate

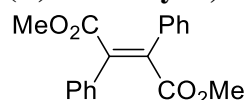

$^1\text{H}$  NMR (400 MHz,  $\text{CDCl}_3$ )  $\delta$  7.46 – 7.35 (m, 10H), 3.57 (s, 6H). This compound is known and the characterization is in consistence with the reported literature.<sup>15</sup>

## (L)References

- (1) For the synthesis of  $\alpha$ -diazoester and  $\alpha$ -diazoketone, see: (a) Li, W.; Wang, J.; Hu, X. L.; Shen, K.; Wang, W. T.; Chu, Y. Y.; Lin, L. L.; Liu, X. H.; Feng, X. M. Catalytic asymmetric Roskamp reaction of  $\alpha$ -alkyl- $\alpha$ -diazoesters with aromatic aldehydes: Highly enantioselective synthesis of  $\alpha$ -alkyl- $\beta$ -keto esters. *J. Am. Chem. Soc.* **2010**, *132*, 8532–8533. (b) Tan, F.; Liu, X. H.; Hao, X. Y.; Tang, Y.; Lin, L. L.; Feng, X. M. Asymmetric catalytic insertion of  $\alpha$ -diazo carbonyl compounds into O–H bonds of carboxylic acids. *ACS Catal.* **2016**, *6*, 6930–6934. (c) Xia, Z. L.; Hu, J. D.; Gao, Y.-Q.; Yao, Q. Z.; Xie, W. Q. Facile access to 2,2-disubstituted indolin-3-ones via a cascade Fischer indolization/Claisen rearrangement reaction. *Chem. Commun.* **2017**, *53*, 7485–7488. For the synthesis of 1-benzyl-3-diazoindolin-2-one, see: (d) Marti, C.; Carreira, E. M. Total synthesis of (–)-spirotryprostatin B: Synthesis and related studies. *J. Am. Chem. Soc.* **2005**, *127*, 11505–11515. For the synthesis of (1-diazo-2,2,2-trifluoroethyl)benzene, see: (e) Denton, J. R.; Sukumaran, D.; Davies, H. M. L. Enantioselective synthesis of trifluoromethyl-substituted cyclopropanes. *Org. Lett.* **2007**, *9*, 2625–2628. For the synthesis of 2-diazo-2-phenylacetonitrile, see: (f) Jiang, Z.; Niu, S.-L.; Zeng, Q.; Ouyang, Q.; Chen, Y.-C.; Xiao, Q. Selective alkynylallylation of the C–C bond of cyclopropenes. *Angew. Chem. Int. Ed.* **2021**, *60*, 297–303.
- (2) For the synthesis of PhtOCF<sub>3</sub>, see: (a) Yuan, W.-J.; Tong, C.-L.; Xu, X.-H.; Qing, F.-L. *N*-Trifluoromethoxyphthalimide: A shelf-stable reagent for nucleophilic trifluoromethoxylation. *J. Org. Chem.* **2023**, *88*, 4434–4444. For the synthesis of PhtSMe, see: (b) Cesario, C.; Miller, M. J. Syntheses of carbocyclic uracil polyoxin C analogs: Application of Pd(0)/InI-allylation of 4-acetoxy-2-azetidinone. *J. Org. Chem.* **2009**, *74*, 5730–5733.
- (3) Frisch, M. J.; Trucks, G. W.; Schlegel, H. B.; Scuseria, G. E.; Robb, M. A.; Cheeseman, J. R.; Scalmani, G.; Barone, V.; Petersson, G. A.; Nakatsuji, H.; Li, X.; Caricato, M.; Marenich, A. V.; Bloino, J.; Janesko, B. G.; Gomperts, R.; Mennucci, B.; Hratchian, H. P.; Ortiz, J. V.; Izmaylov, A. F.; Sonnenberg, J. L.; Williams-Young, D.; Ding, F.; Lipparini, F.; Egidi, F.; Goings, J.; Peng, B.; Petrone, A.; Henderson, T.; Ranasinghe, D.; Zakrzewski, V. G.; Gao, J.; Rega, N.; Zheng, G.; Liang, W.; Hada, M.; Ehara, M.; Toyota, K.; Fukuda, R.; Hasegawa, J.; Ishida, M.; Nakajima, T.; Honda, Y.; Kitao, O.; Nakai, H.; Vreven, T.; Throssell, K.; Montgomery, J. A., Jr.; Peralta, J. E.; Ogliaro, F.; Bearpark, M. J.; Heyd, J. J.; Brothers, E. N.; Kudin, K. N.; Staroverov, V. N.; Keith, T. A.; Kobayashi, R.; Normand, J.; Raghavachari, K.; Rendell, A. P.; Burant, J. C.; Iyengar, S. S.; Tomasi, J.; Cossi, M.; Millam, J. M.; Klene, M.; Adamo, C.; Cammi, R.; Ochterski, J. W.; Martin, R. L.; Morokuma, K.; Farkas, O.; Foresman, J. B.; Fox, D. J. *Gaussian 16, Rev. A.03*; Gaussian, Inc.: Wallingford, CT, 2016.
- (4) Becke, A. D. *J. Chem. Phys.* **1993**, *98*, 5648–5652.
- (5) Lee, C.; Yang, W.; Parr, R. G. *Phys. Rev. B: Condens. Matter Mater. Phys.* **1988**, *37*, 785–789.
- (6) Grimme, S.; Antony, J.; Ehrlich, S.; Krieg, H. *J. Chem. Phys.* **2010**, *132*, 154104.
- (7) Johnson, E. R.; Becke, A. D. *J. Chem. Phys.* **2006**, *124*, 174104.
- (8) Weigend, F. *Phys. Chem. Chem. Phys.* **2006**, *8*, 1057–1065.

- (9) Marenich, A. V.; Cramer, C. J.; Truhlar, D. G. *J. Phys. Chem. B* **2009**, *113*, 6378–6396.
- (10) Dennington, R.; Keith, T.; Millam, J. *GaussView, Version 6.1.1*; Semichem Inc.: Shawnee Mission, KS, 2019.
- (11) Legault, C. Y. *CYLVview, 1.0b*: Université de Sherbrooke, 2009 (<http://www.cylview.org>).
- (12) Thompson, J. L.; Davies, H. M. L. *J. Am. Chem. Soc.* **2007**, *129*, 6090–6091.
- (13) Bannon, R.; Morrison, G.; Smyth, M.; Moody, T. S.; Wharry, S.; Roth, P. M. C.; Gauron, G.; Baumann, M. Continuous flow approach for benzylic photo-oxidations using compressed air. *Org. Process Res. Dev.* **2024**, *28*, 3307–3312.
- (14) Xin, X. Q.; Xiang, D. X.; Yang, J. M.; Zhang, Q.; Zhou, F. G.; Dong, D. W. Homogeneous and stereoselective copper(II)-catalyzed monohydration of methylenemalononitriles to 2-cyanoacrylamides. *J. Org. Chem.* **2013**, *78*, 11956–11961.
- (15) Zhao, R.; Teng, J.; Wang, Z.; Dong, W.; Lin, J.; Chu, C. Copper on charcoal: Cu<sup>0</sup> nanoparticle catalysed aerobic oxidation of  $\alpha$ -diazo esters. *Org. Biomol. Chem.* **2021**, *19*, 6120–6126.

# (M) Copies of NMR spectra for the products

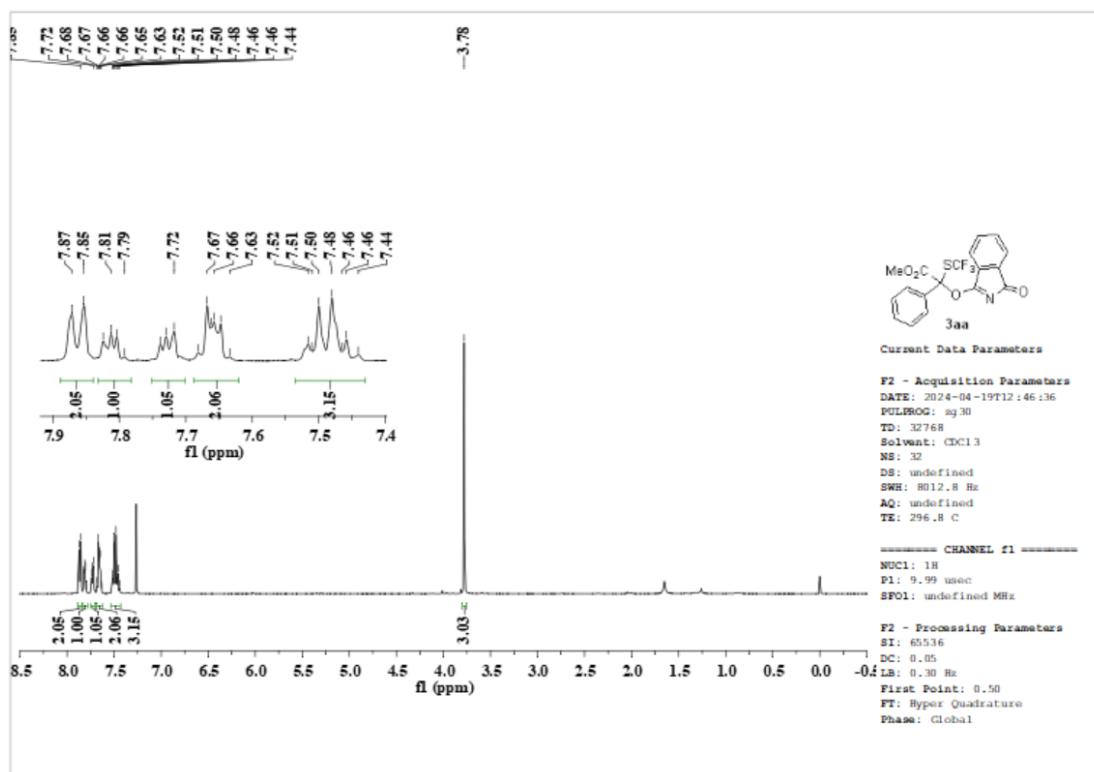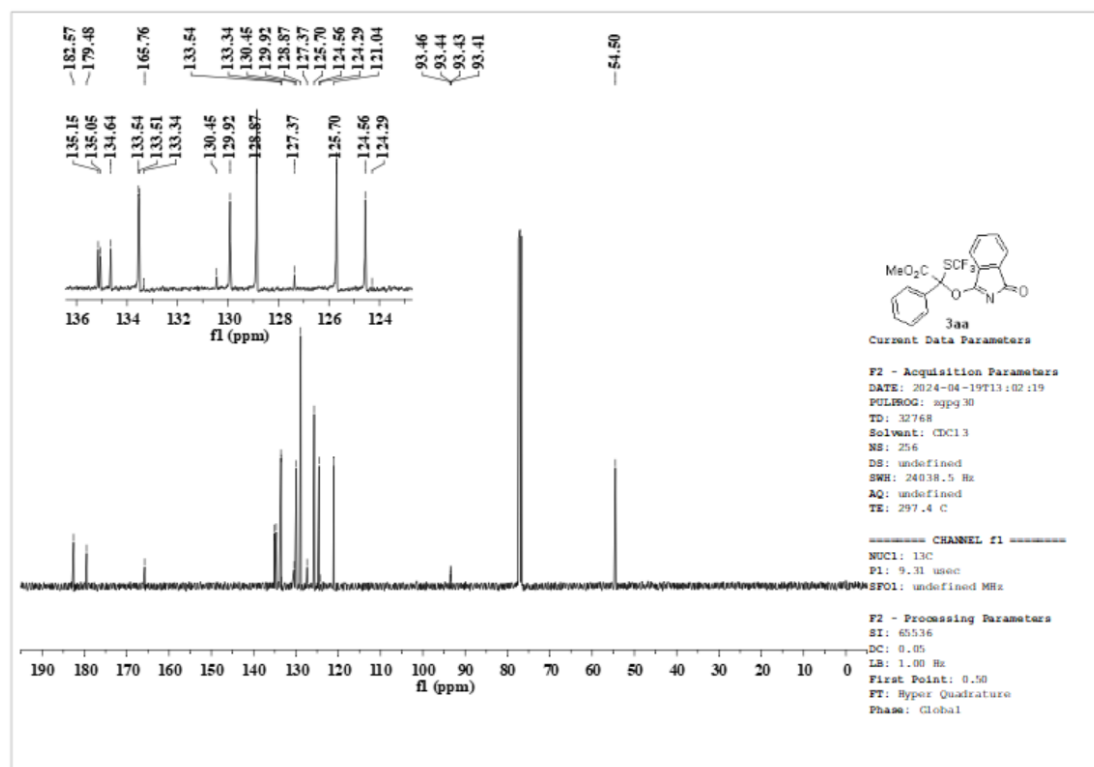

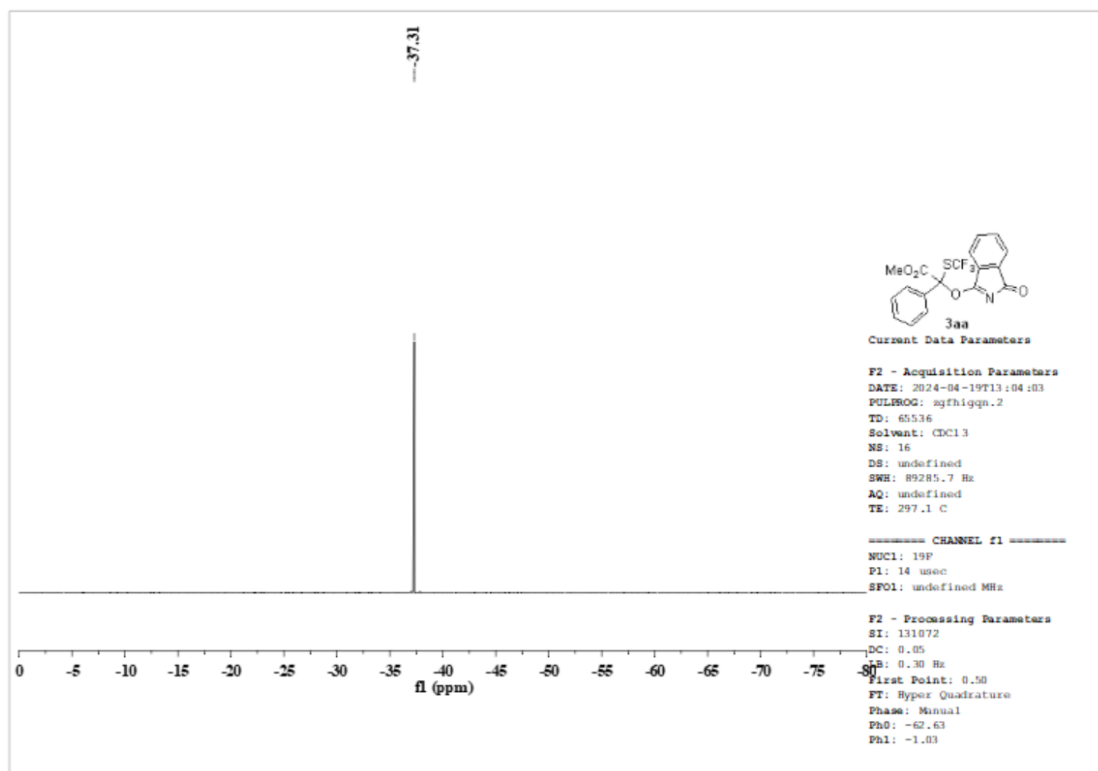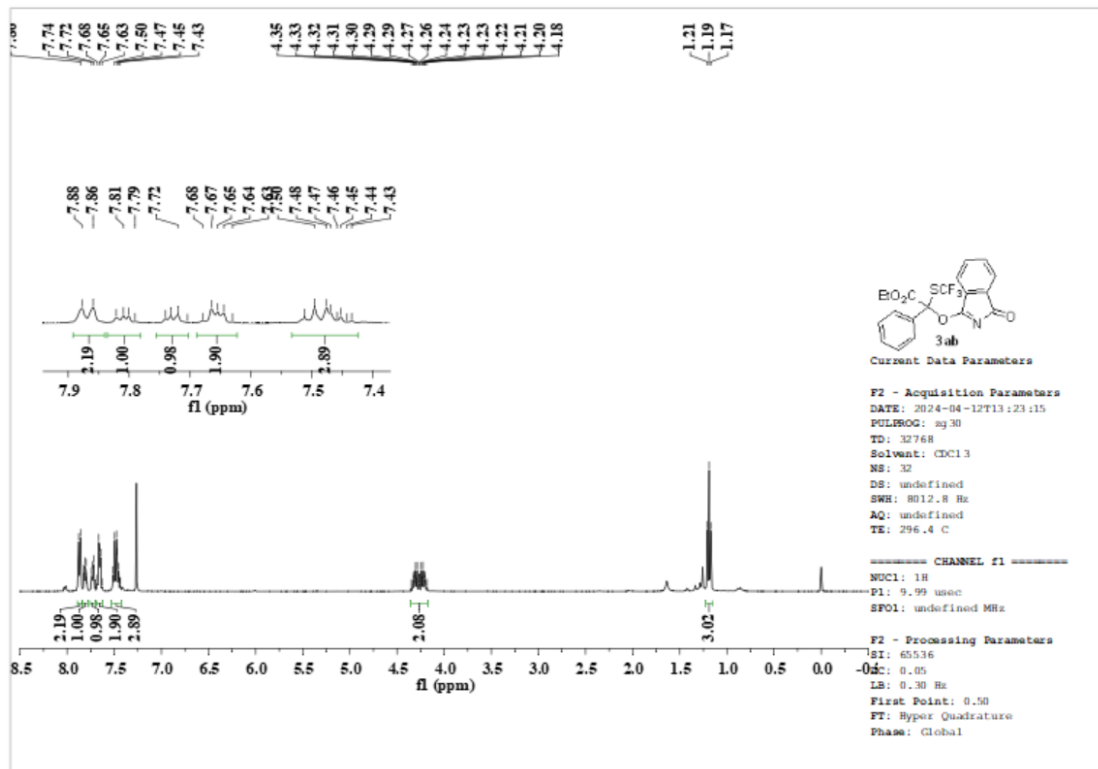

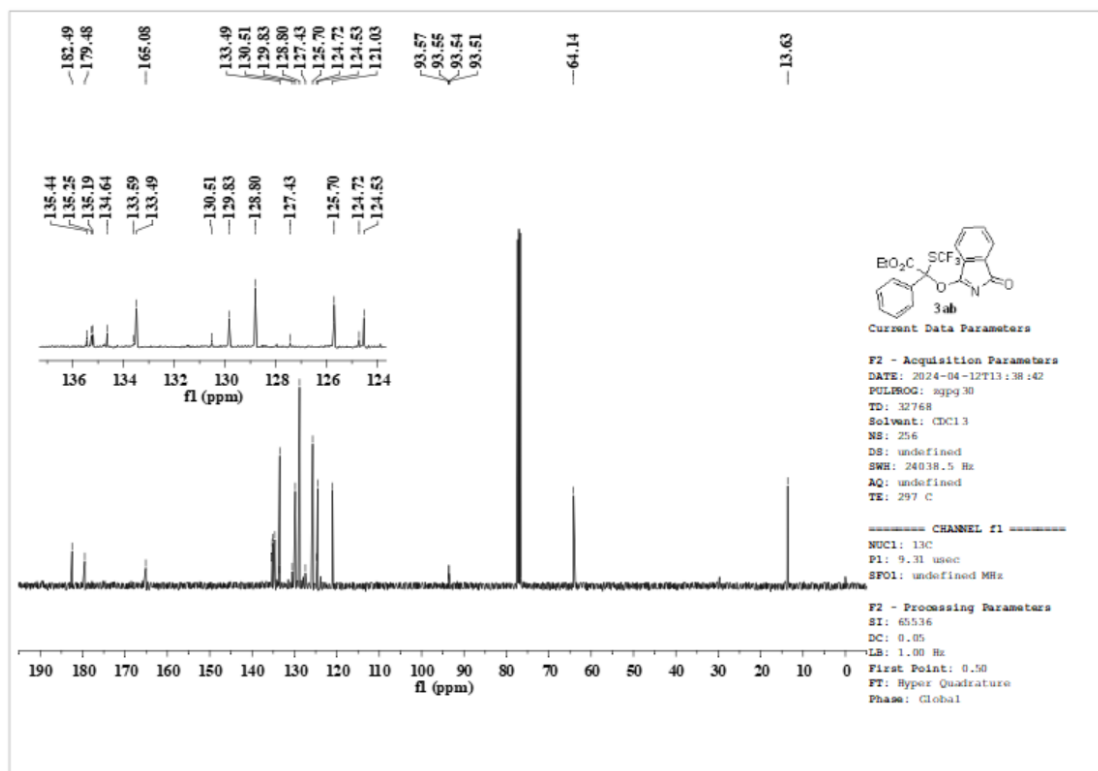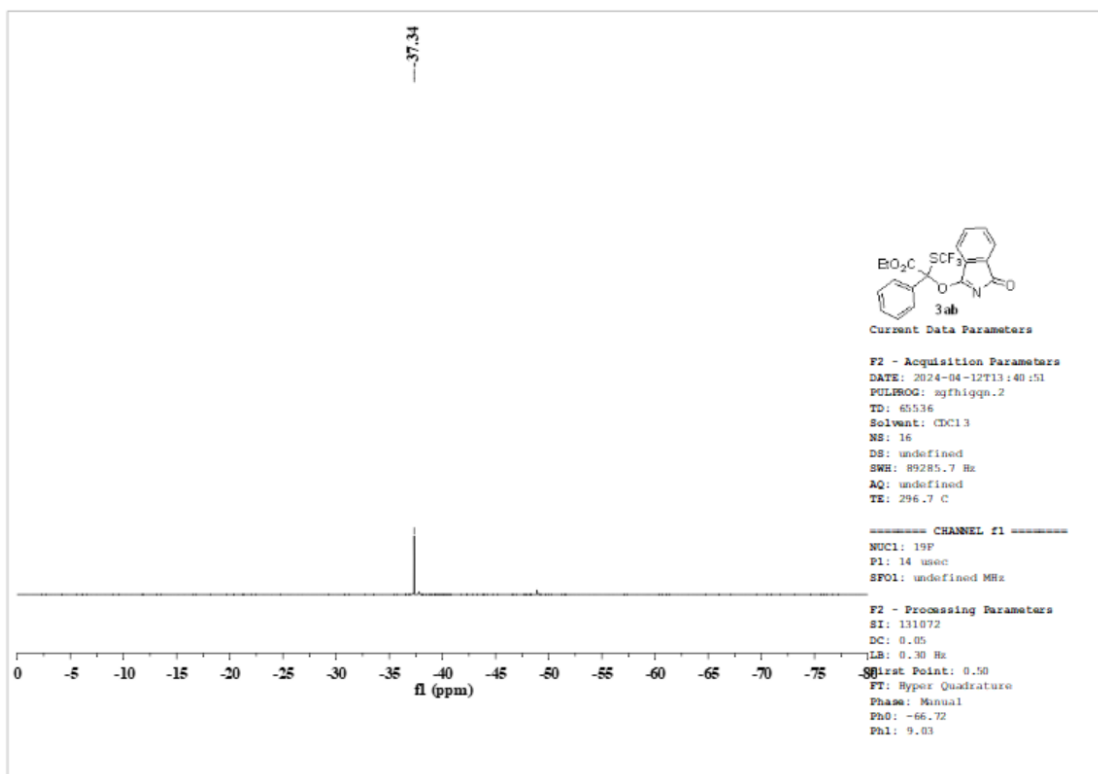

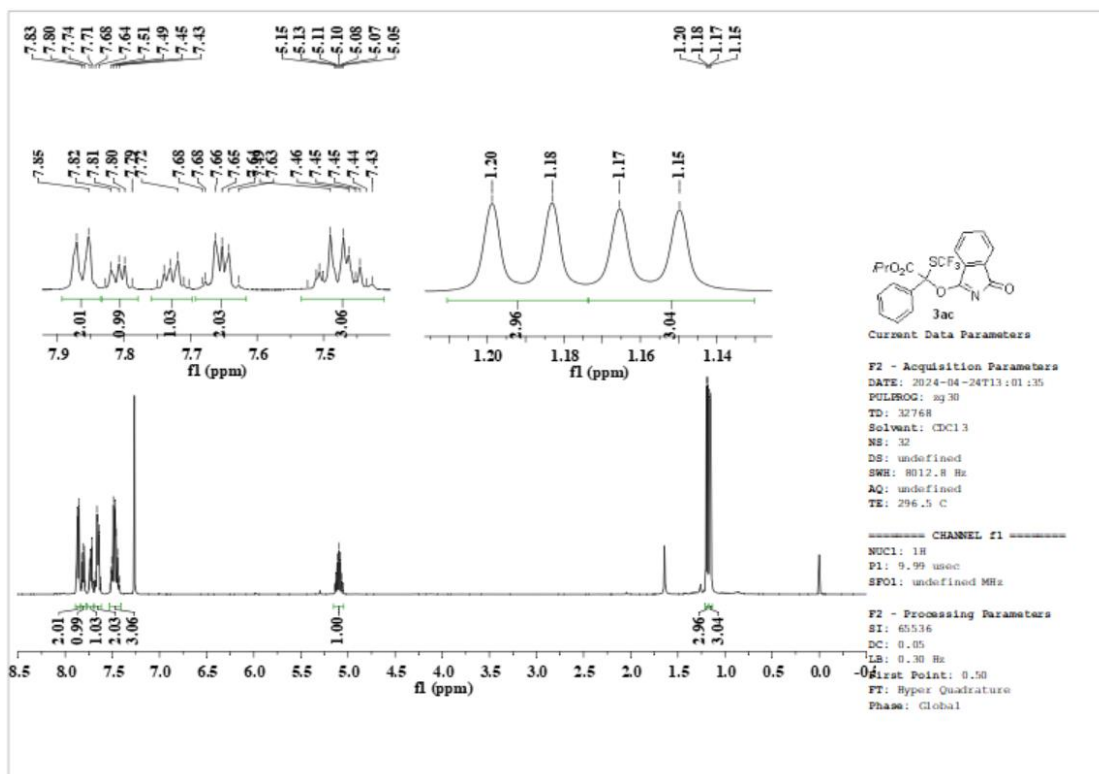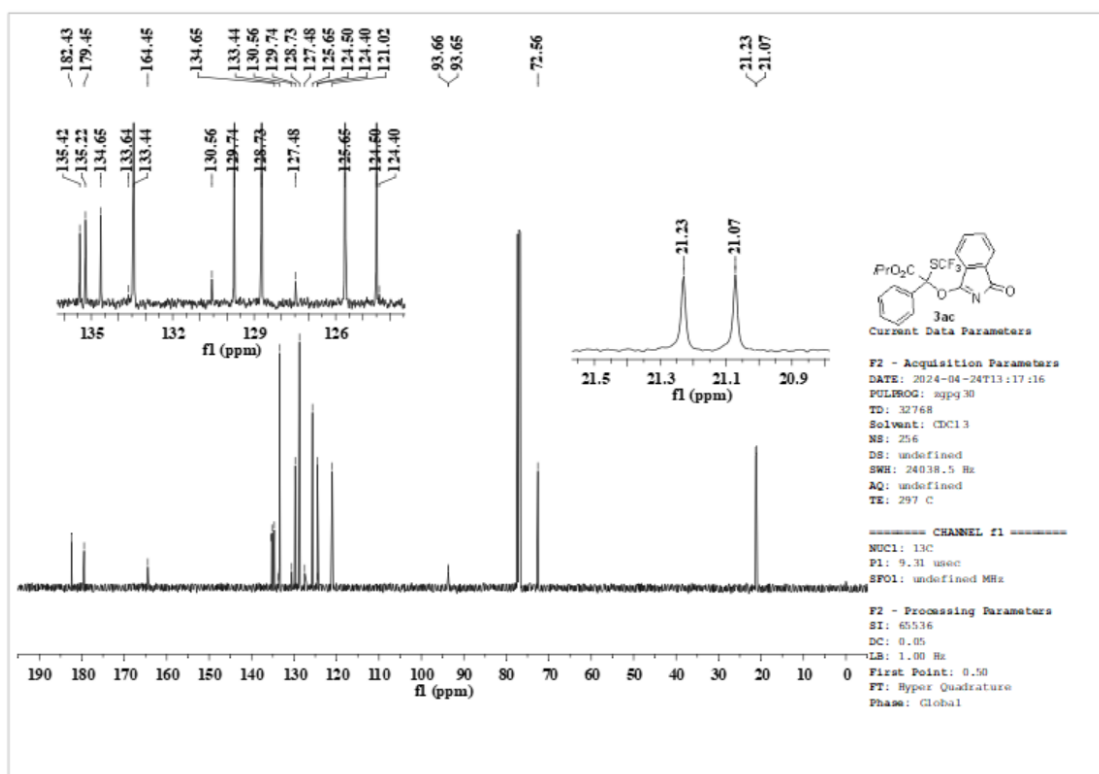

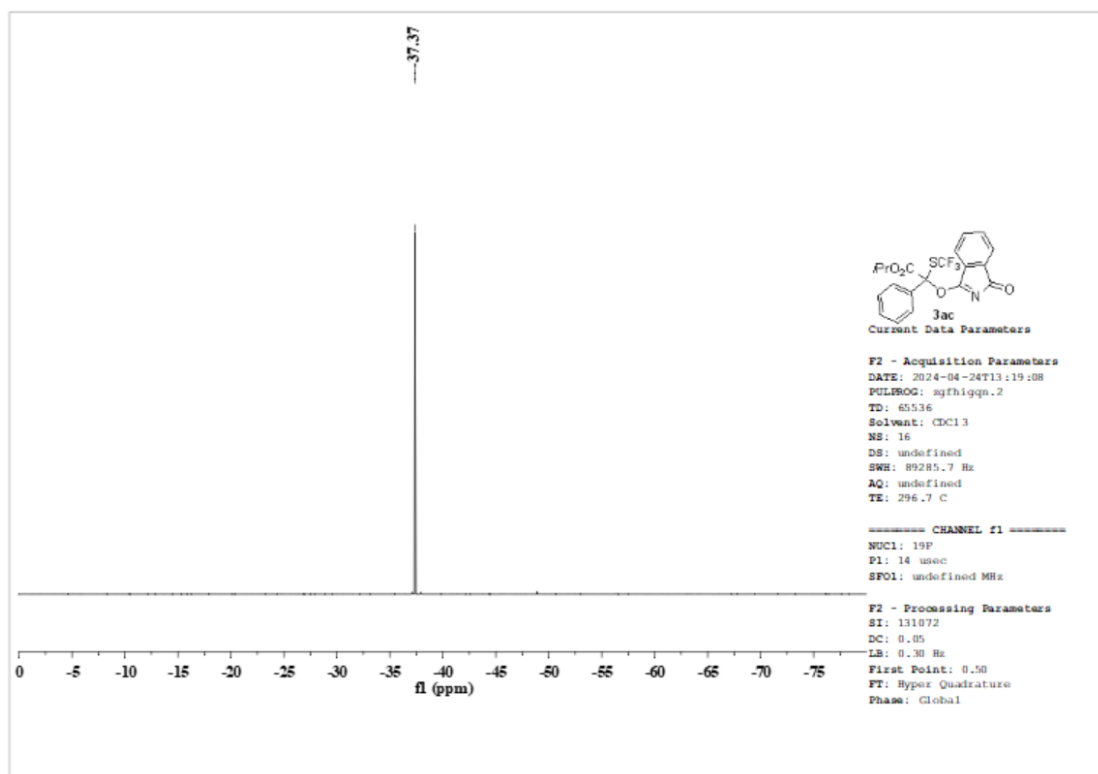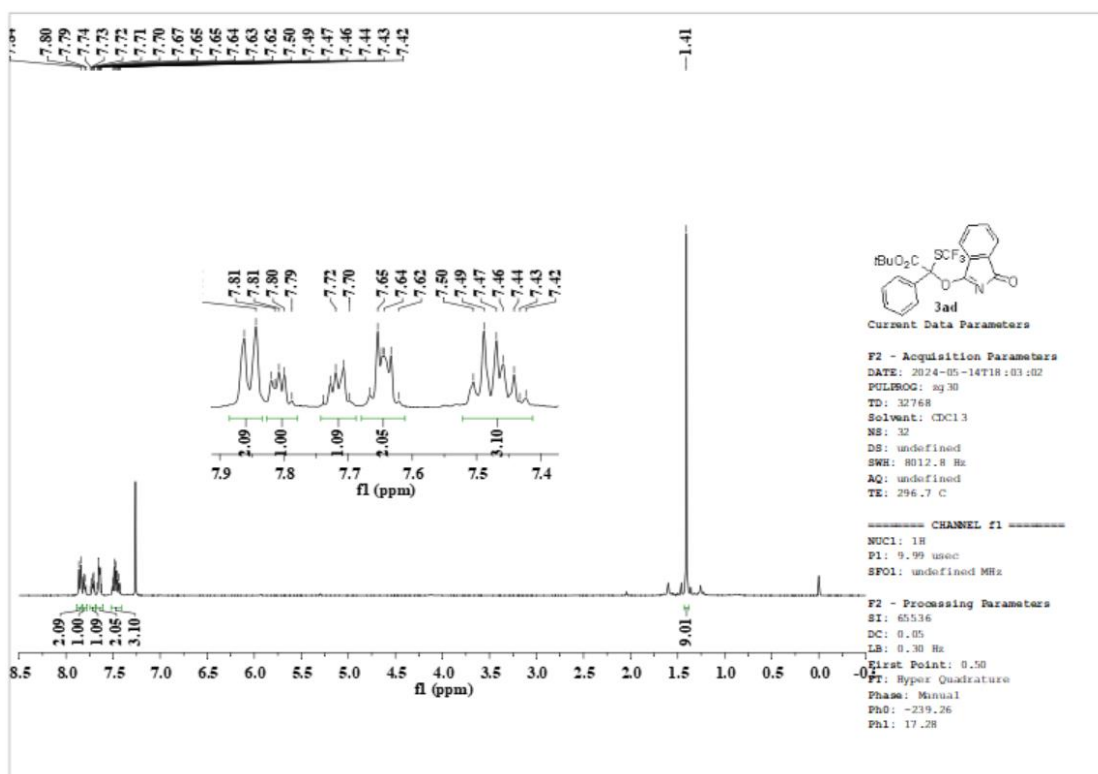



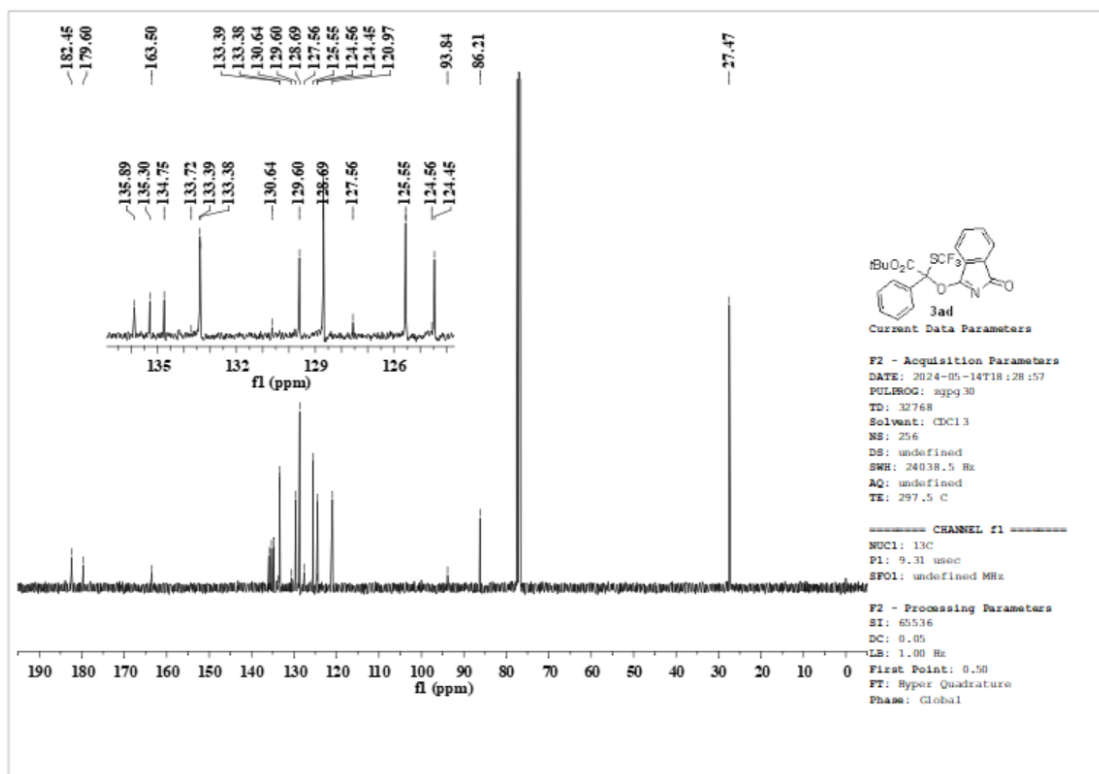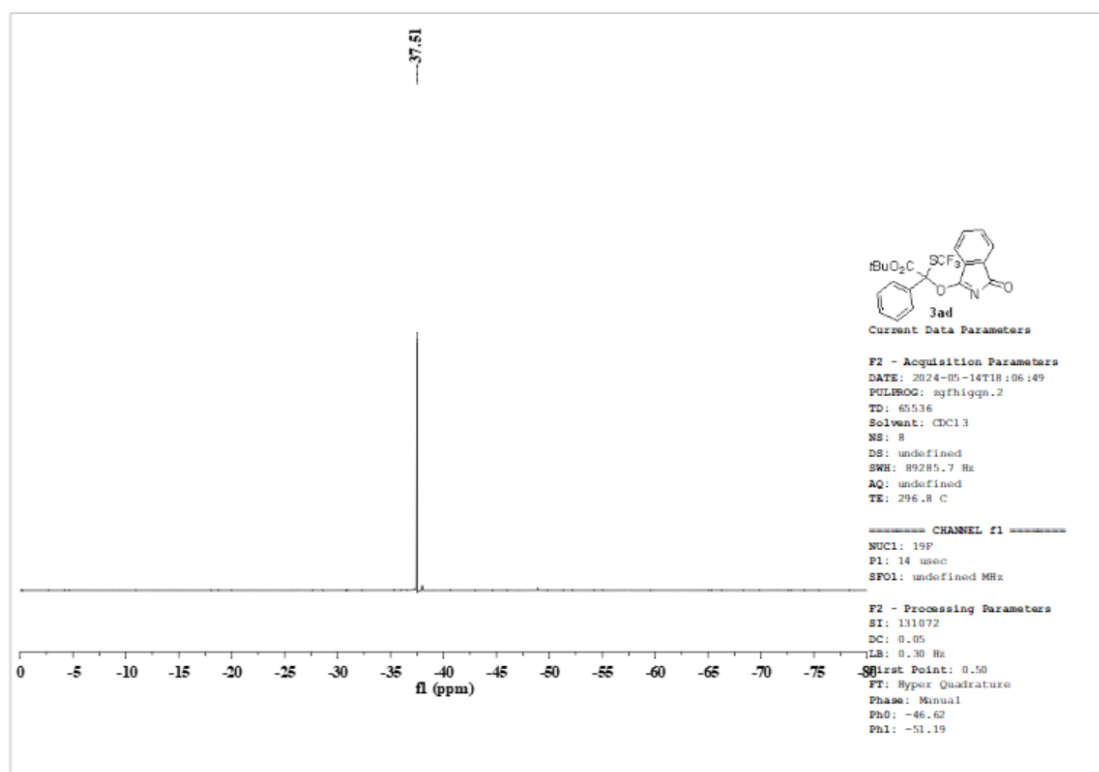

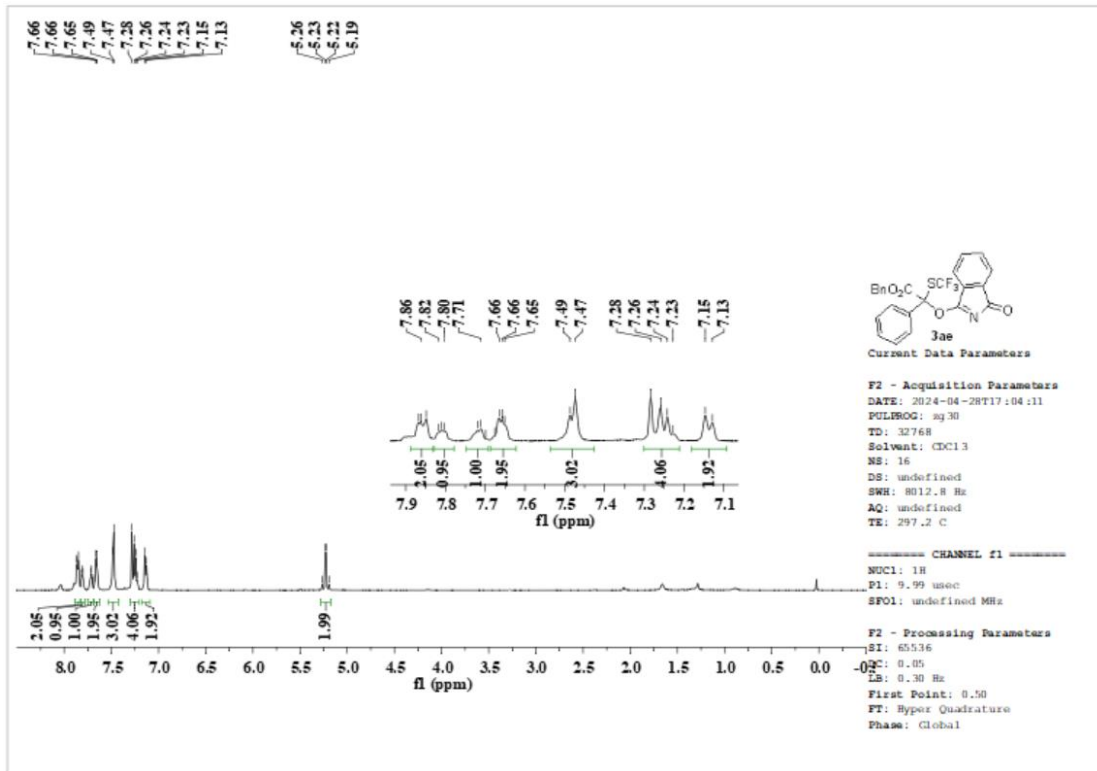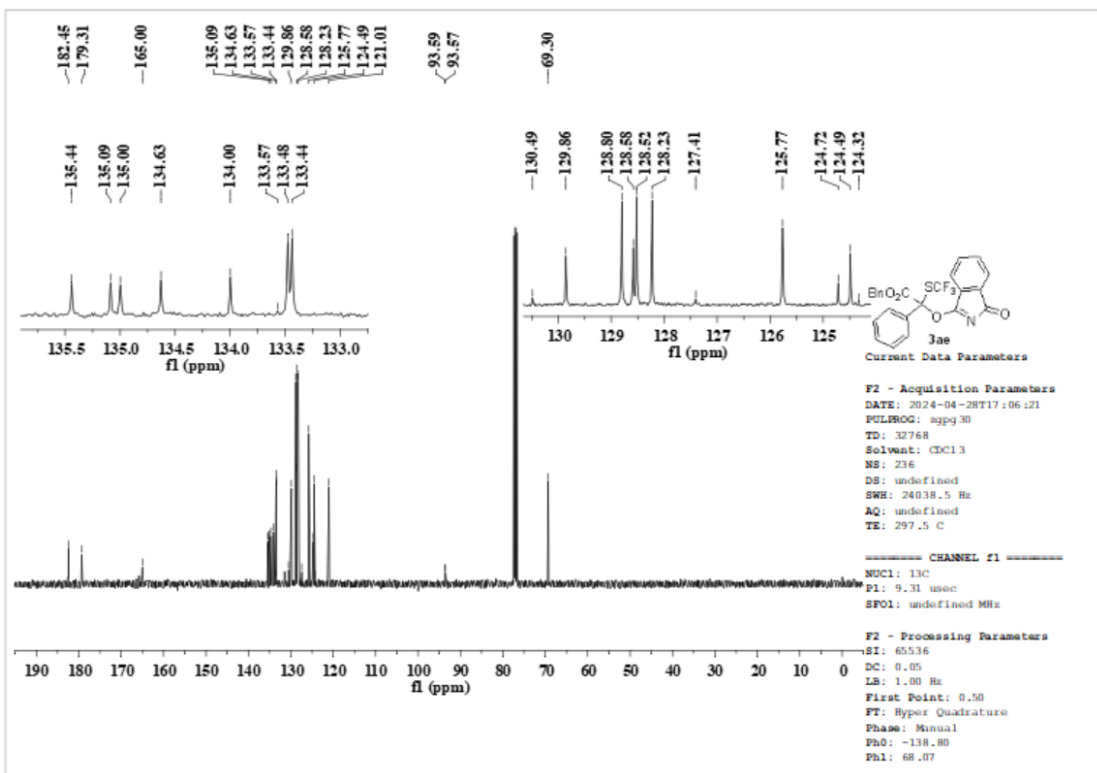

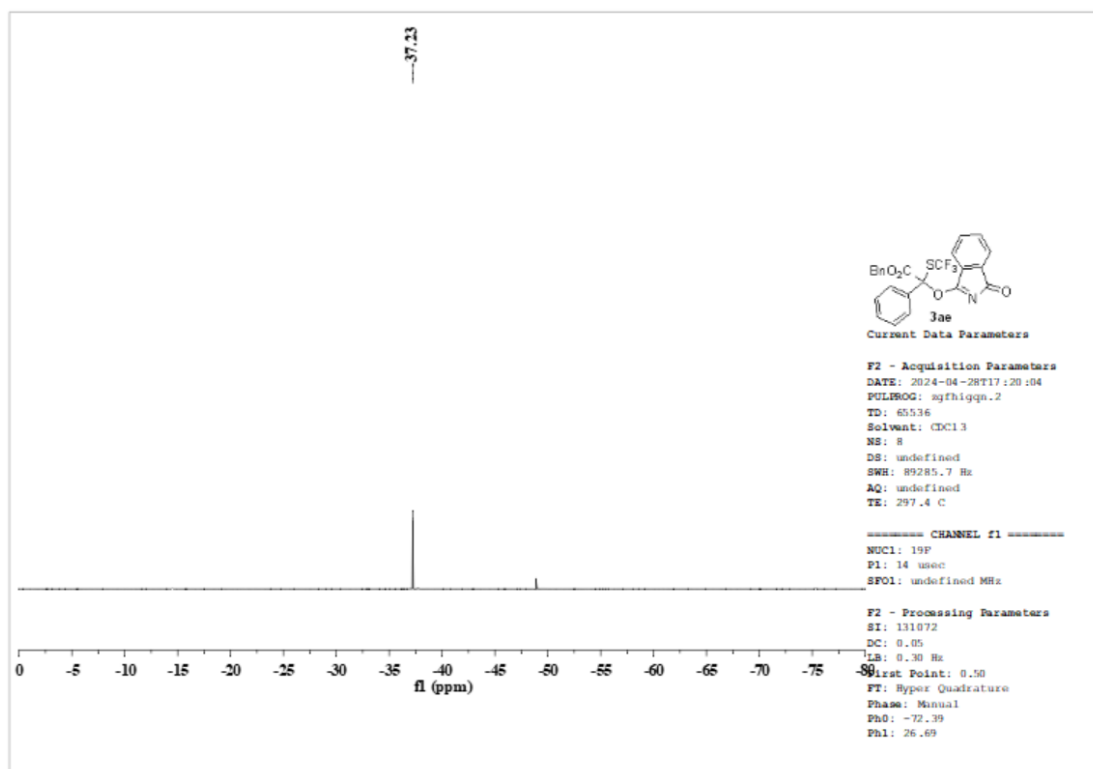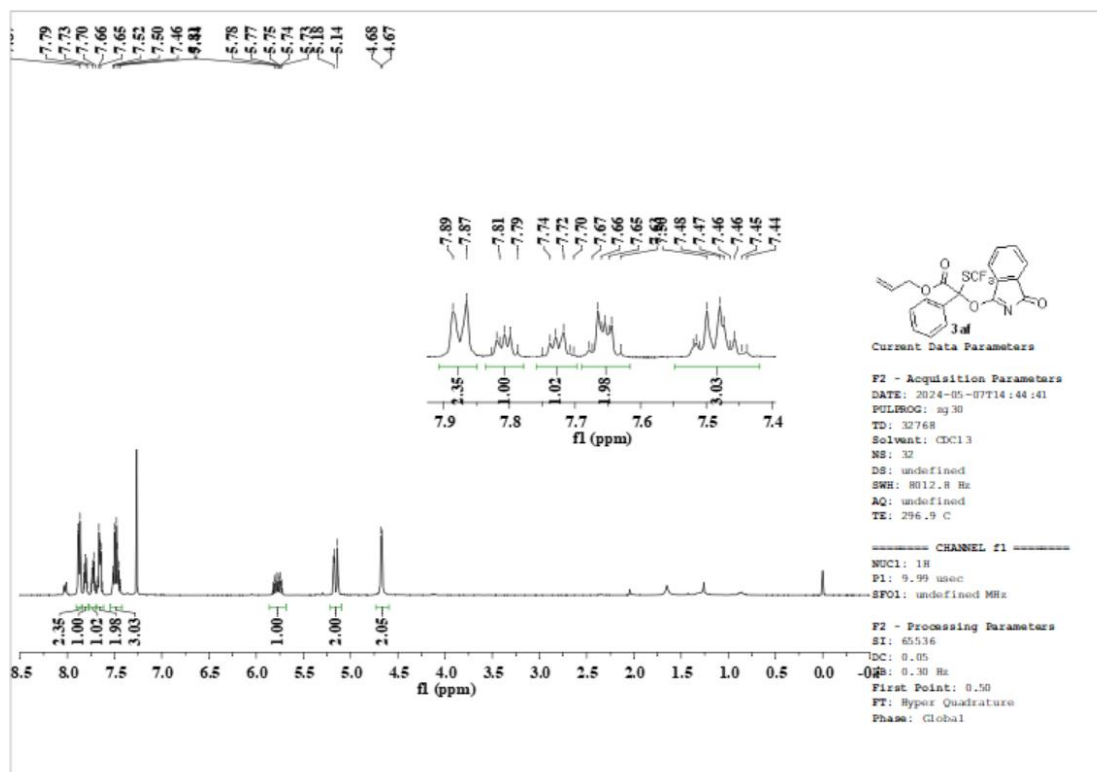

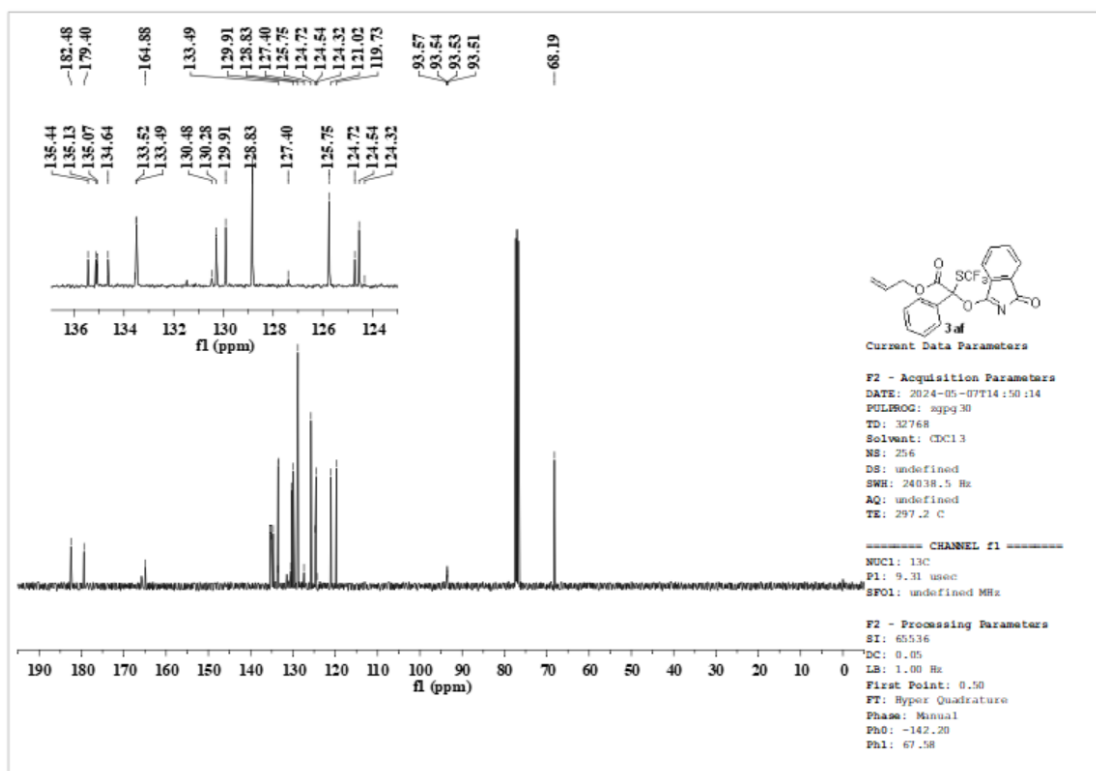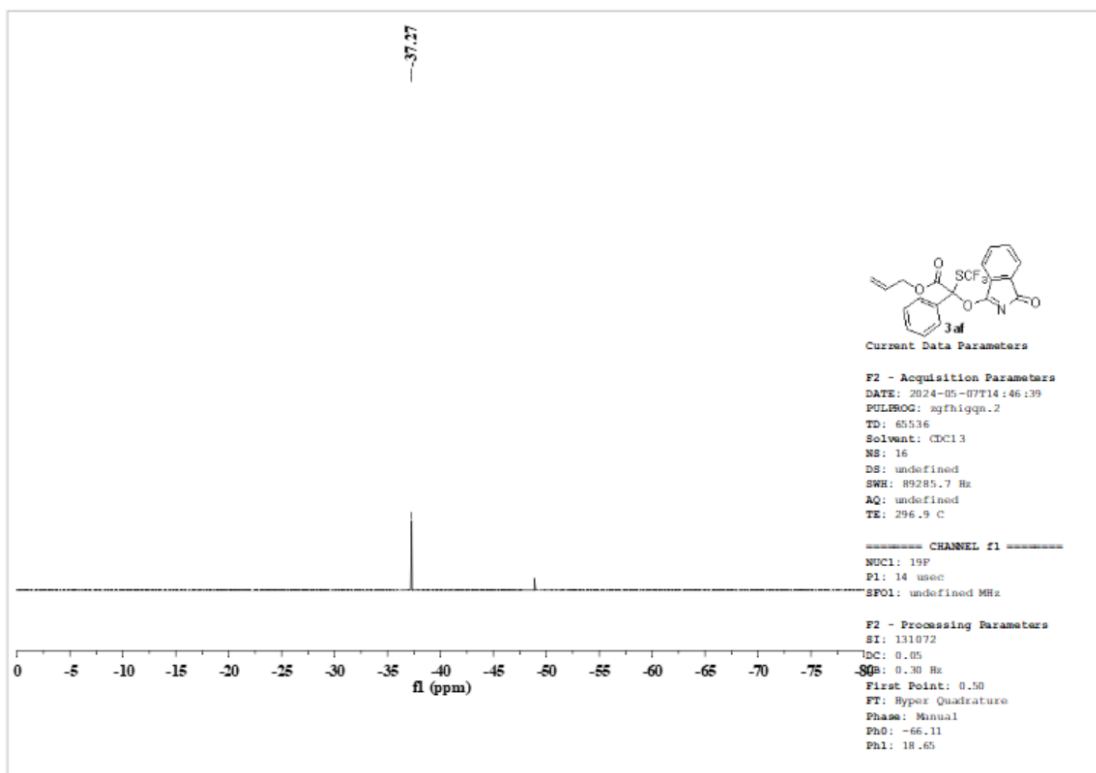

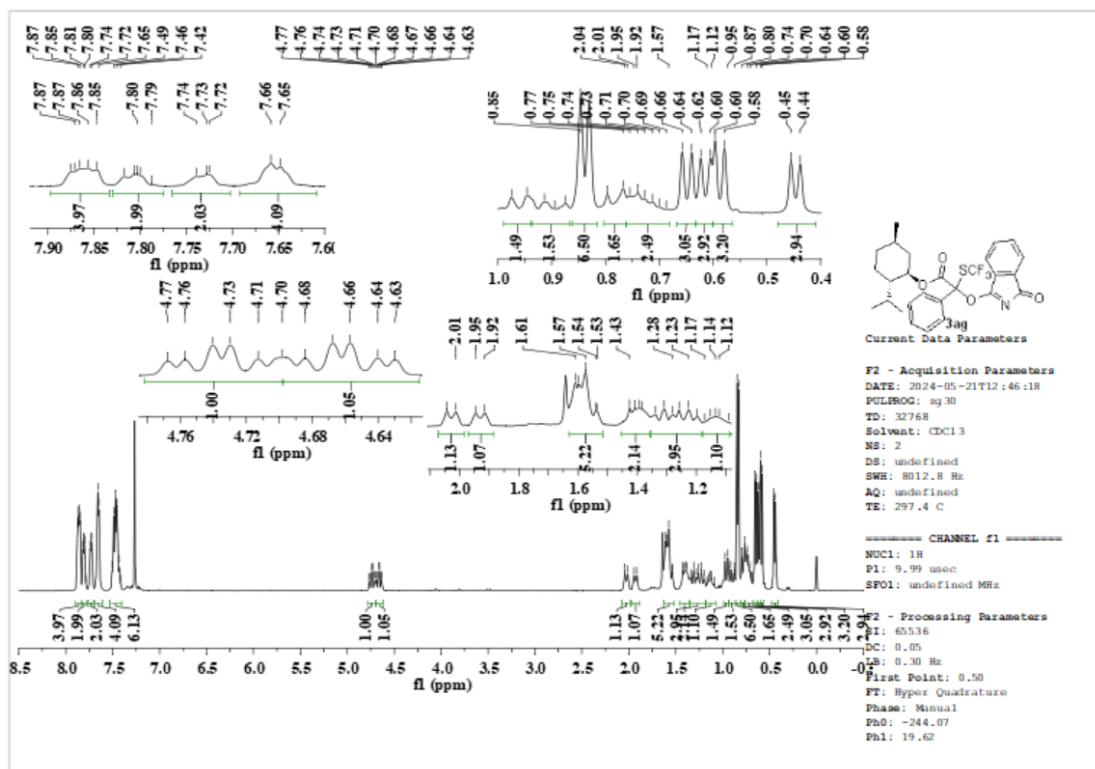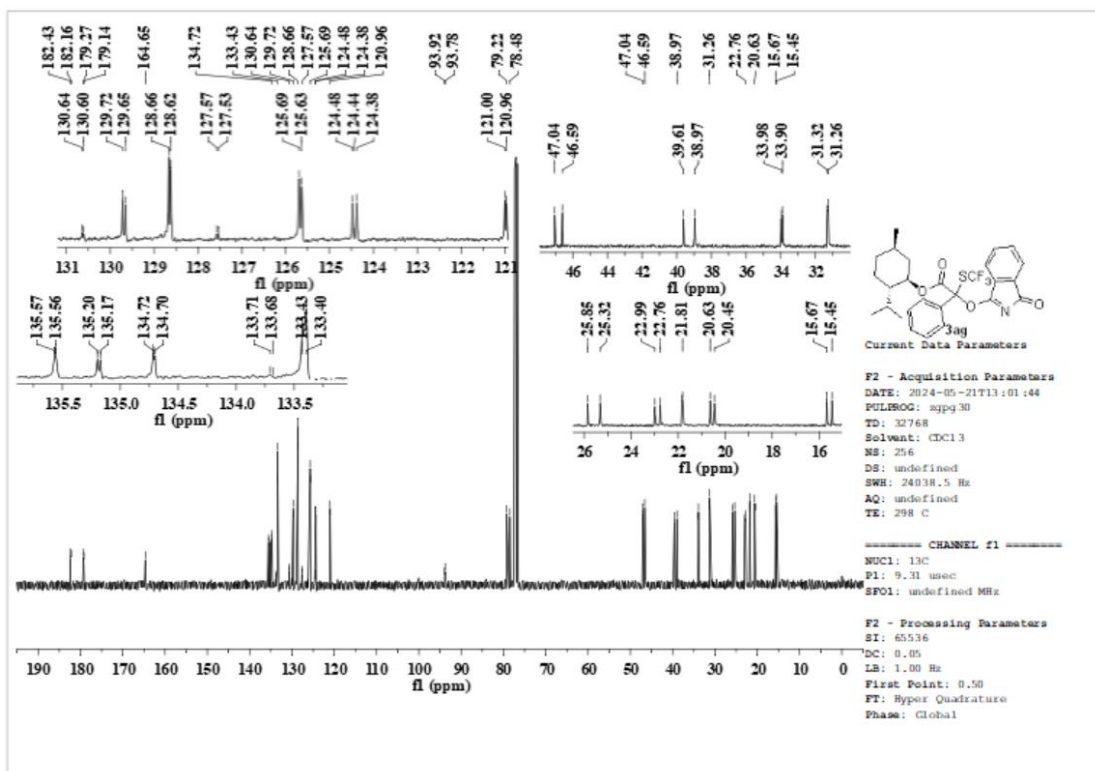

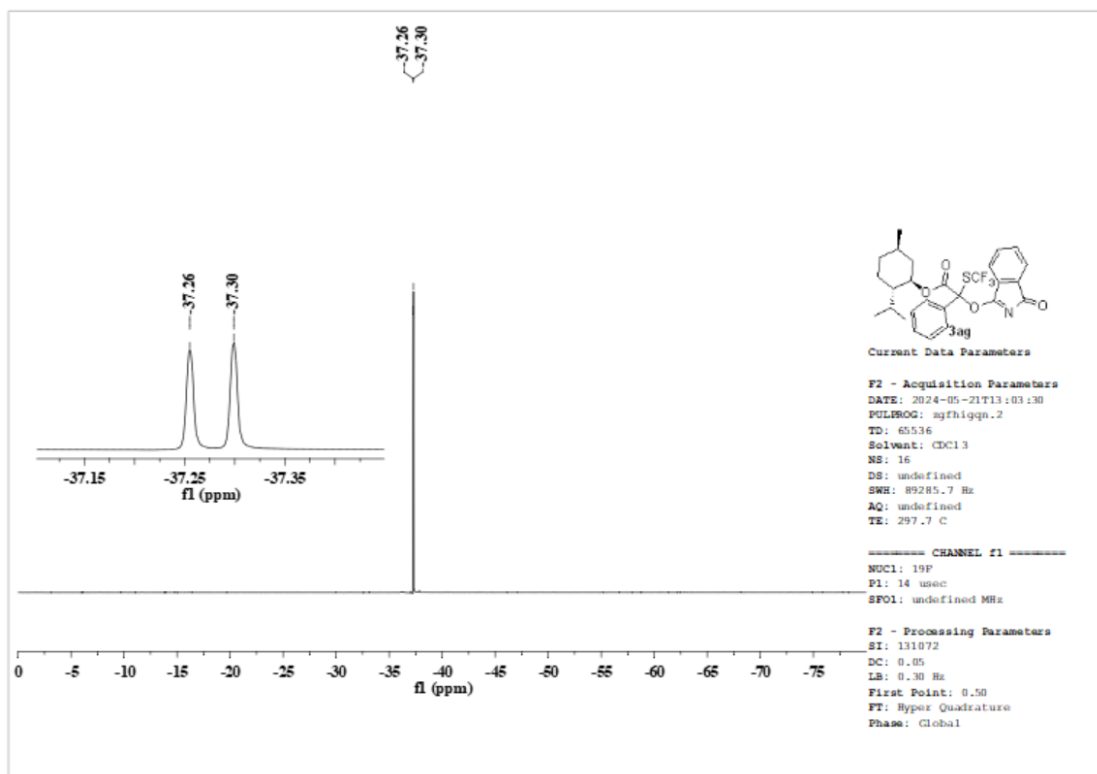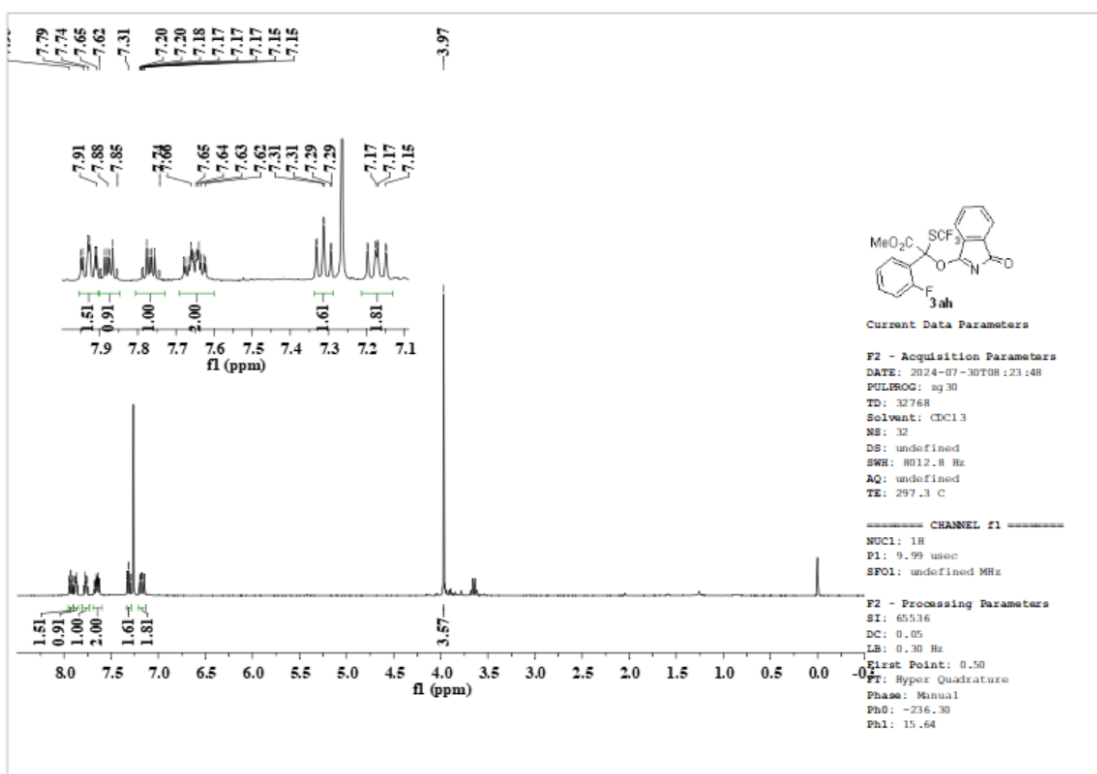

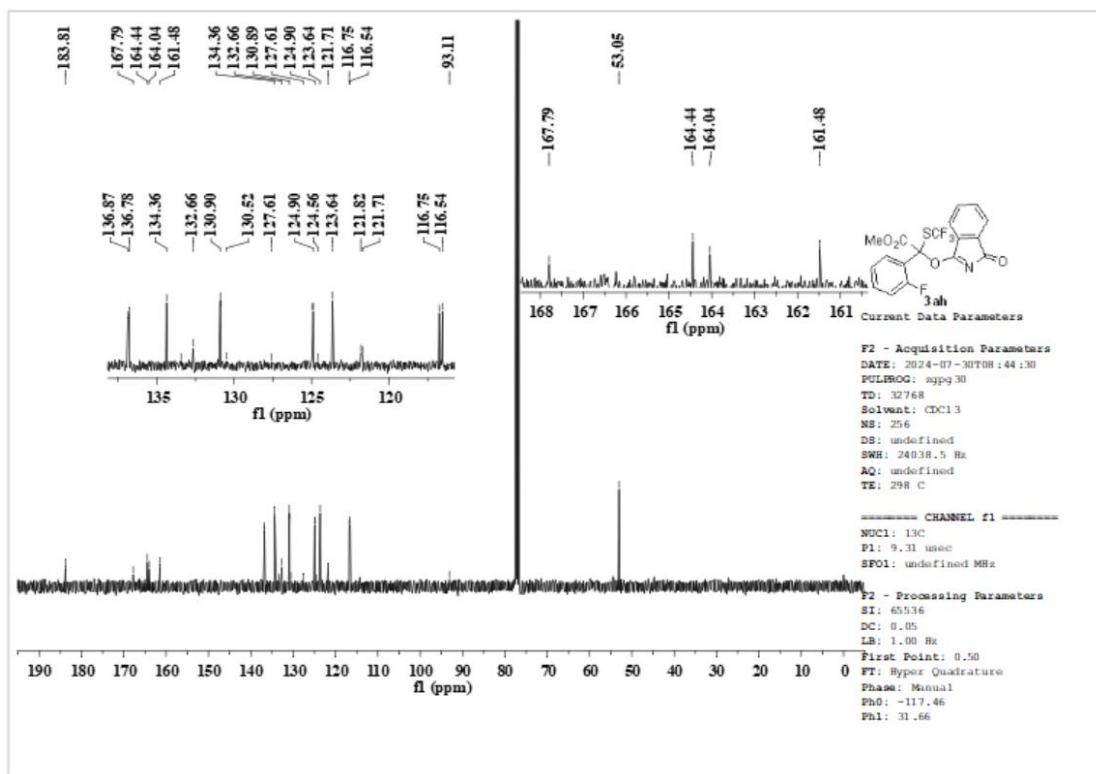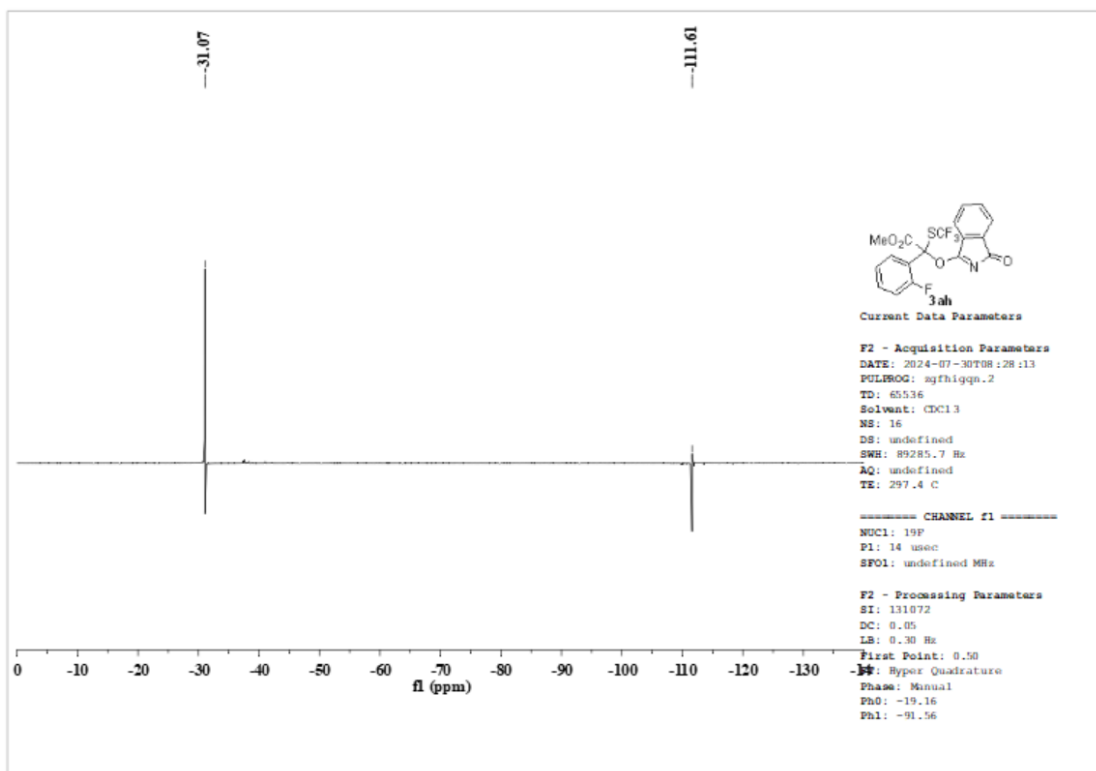

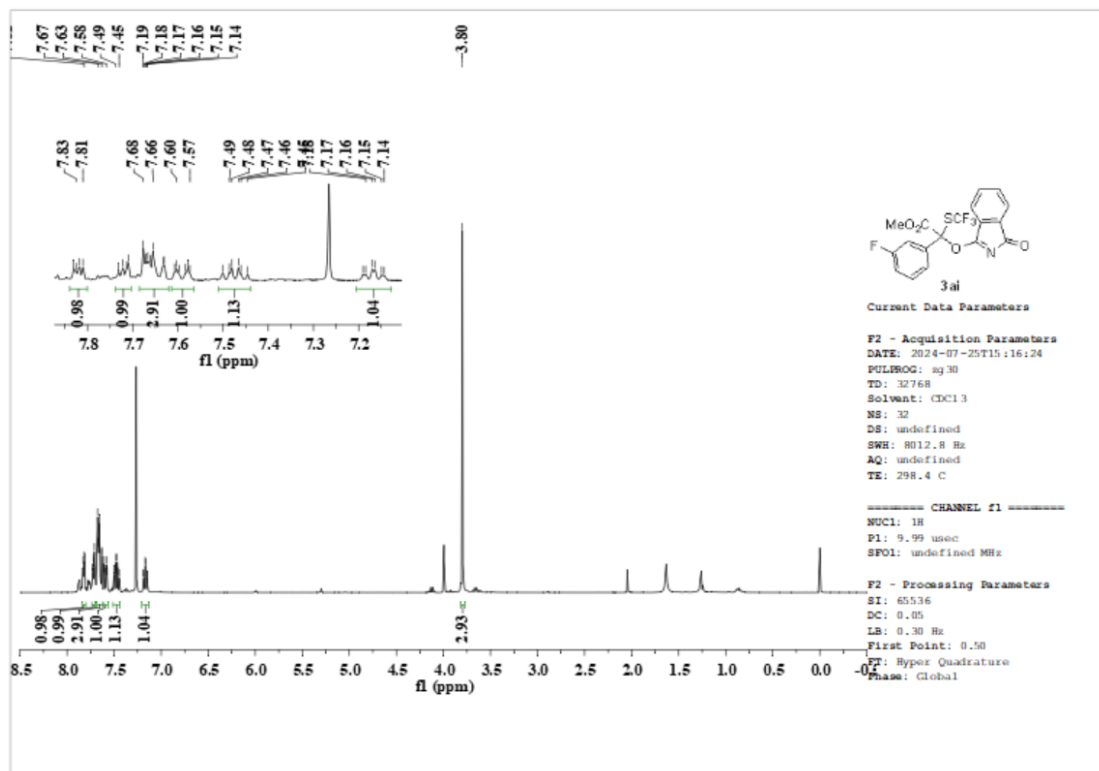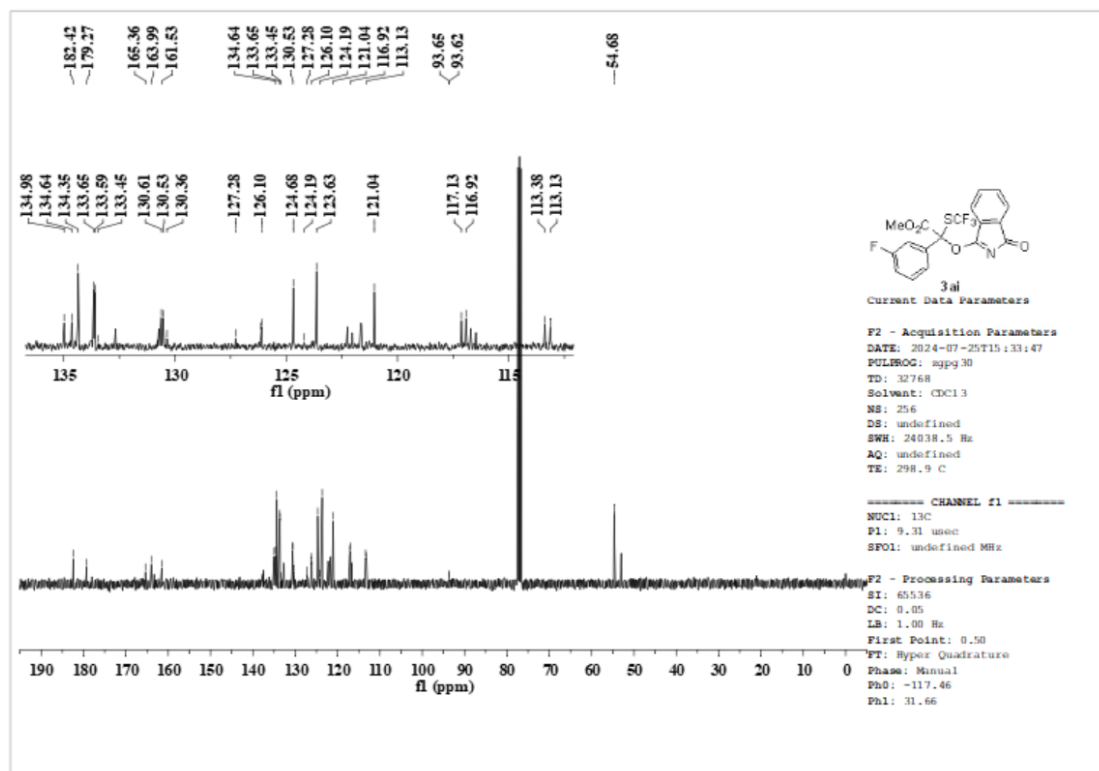



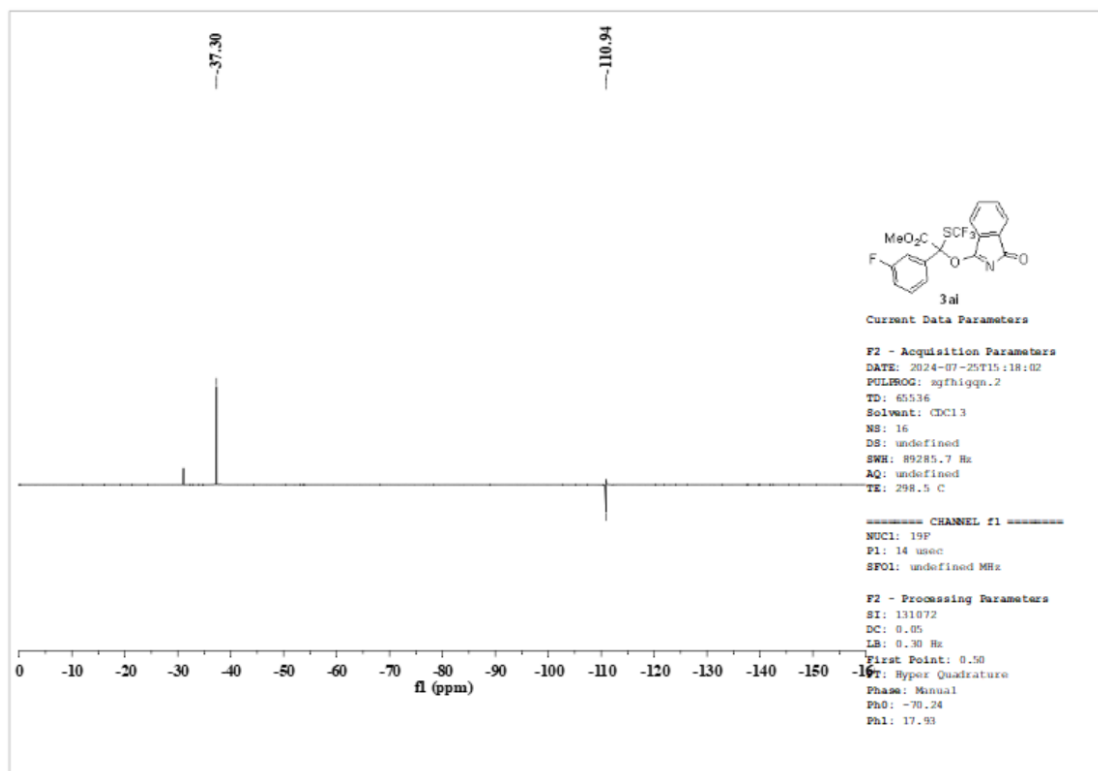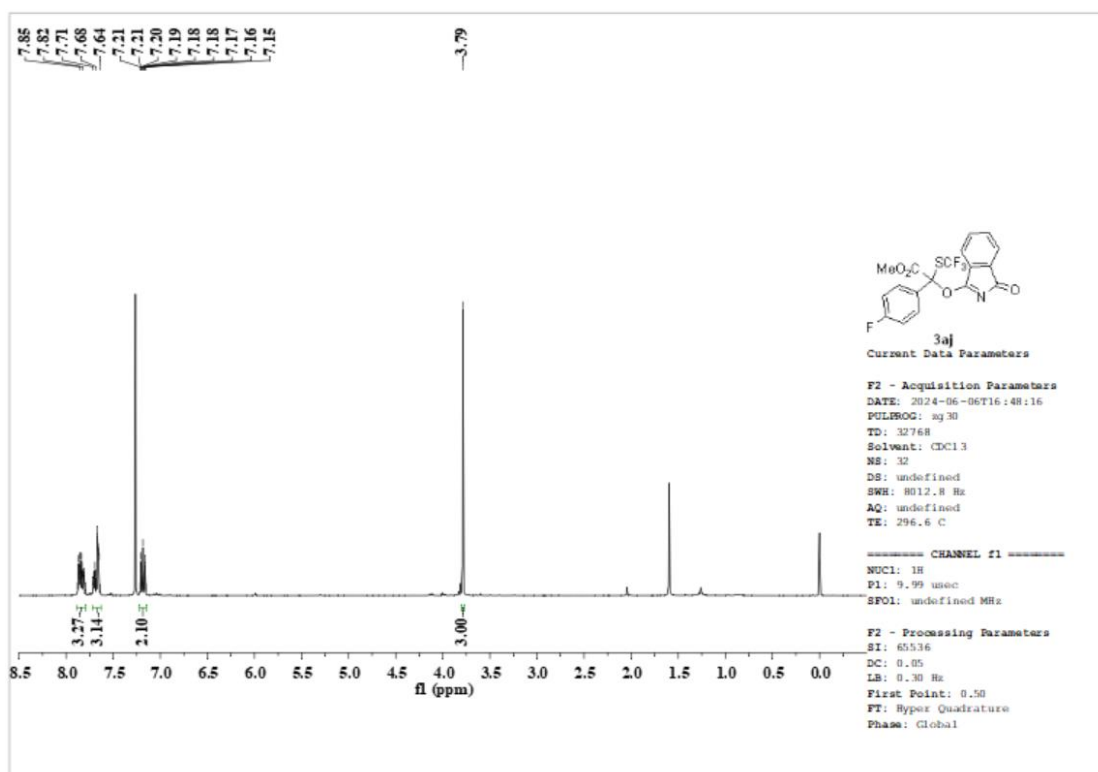

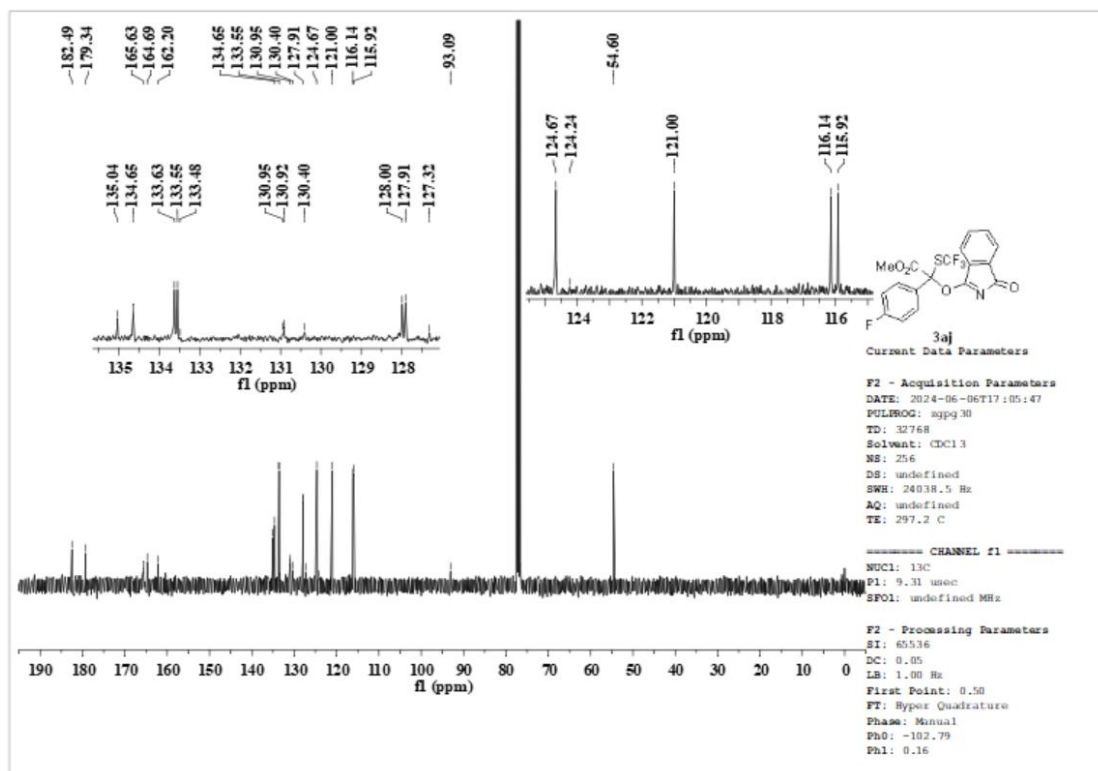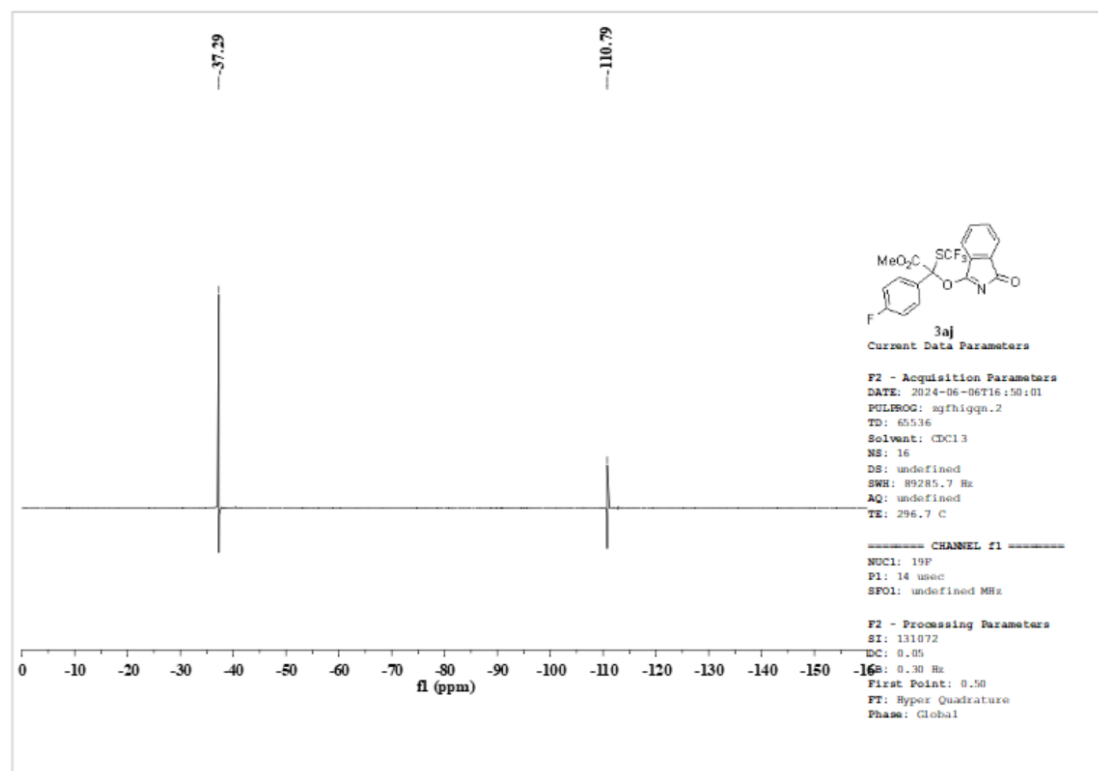

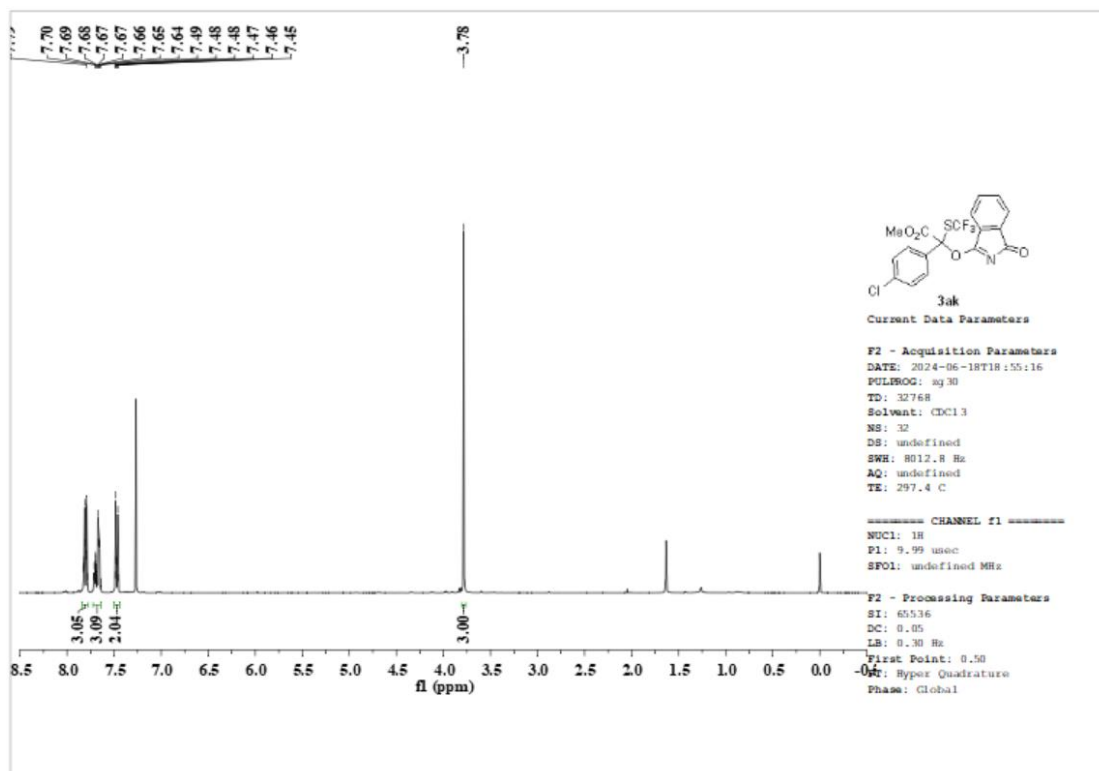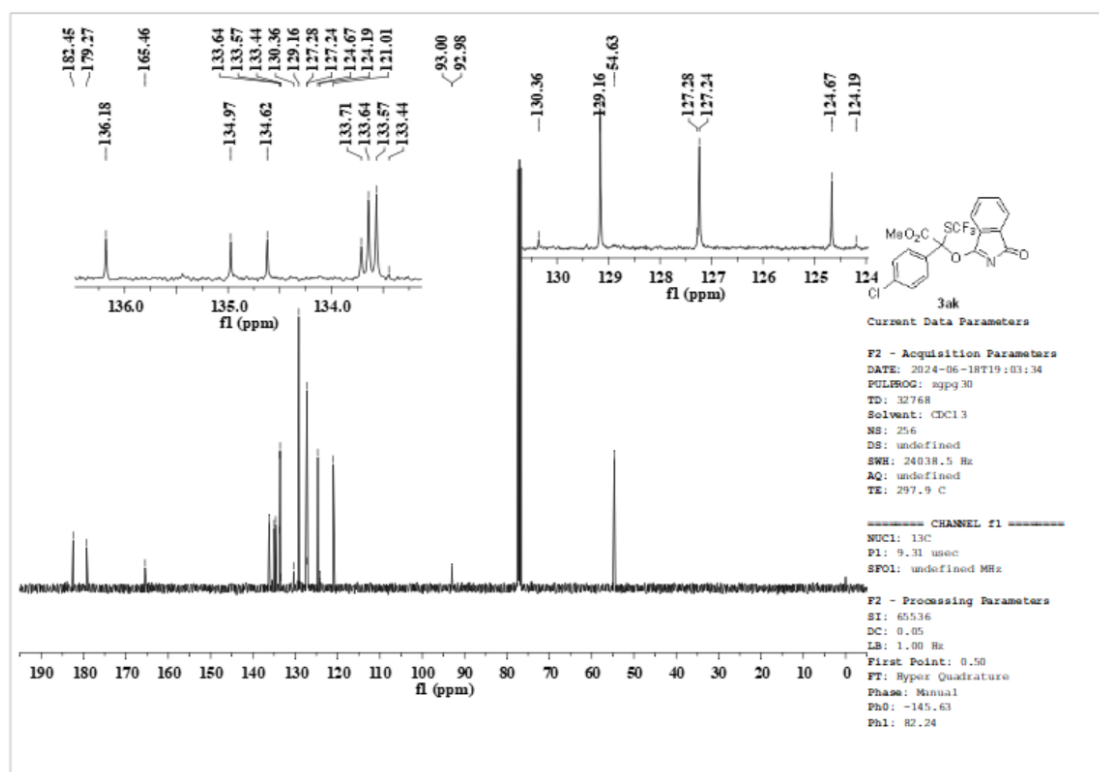

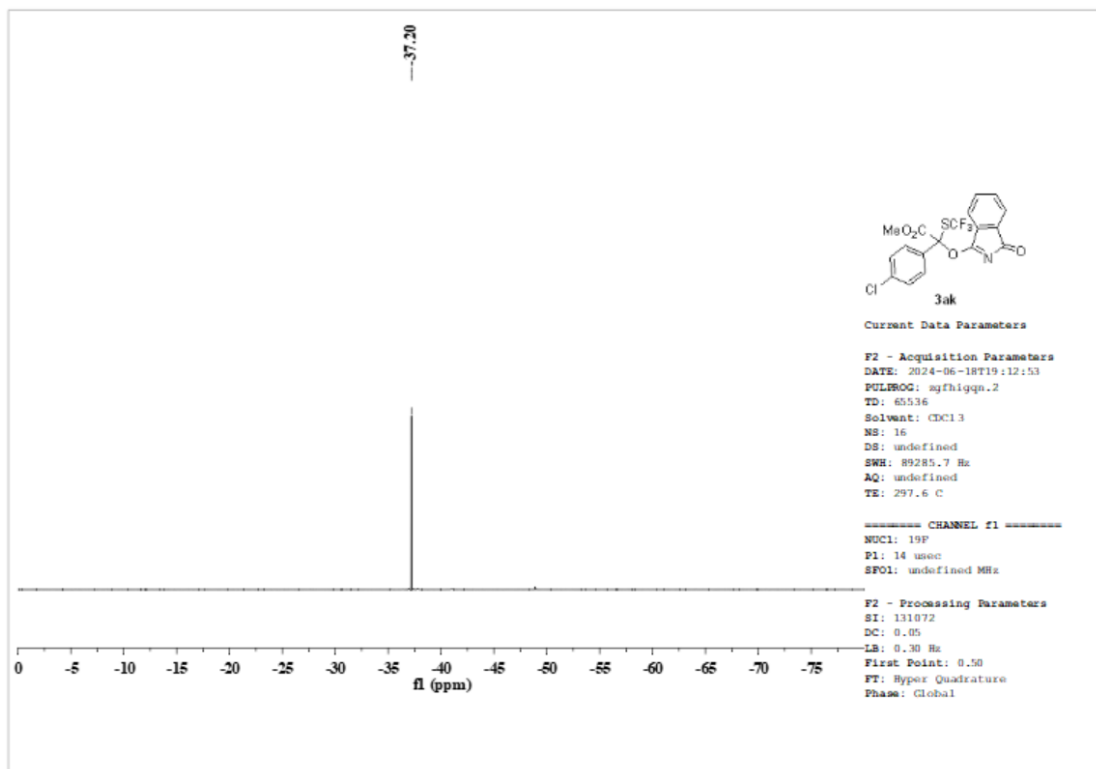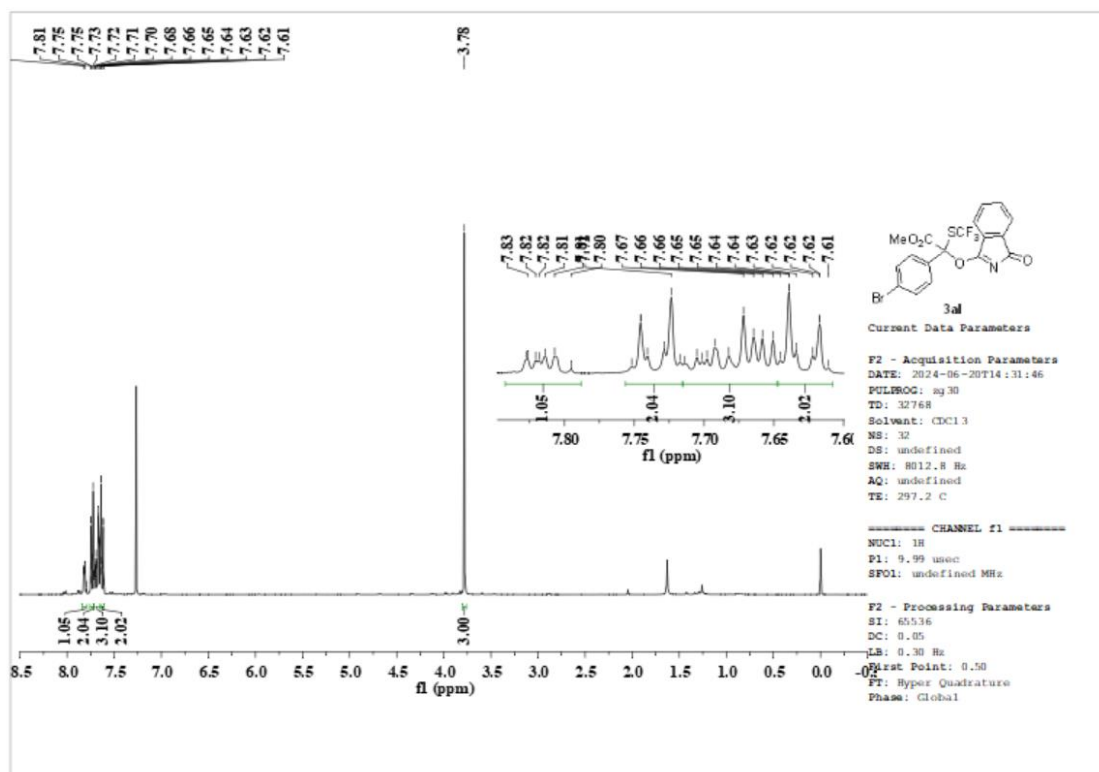

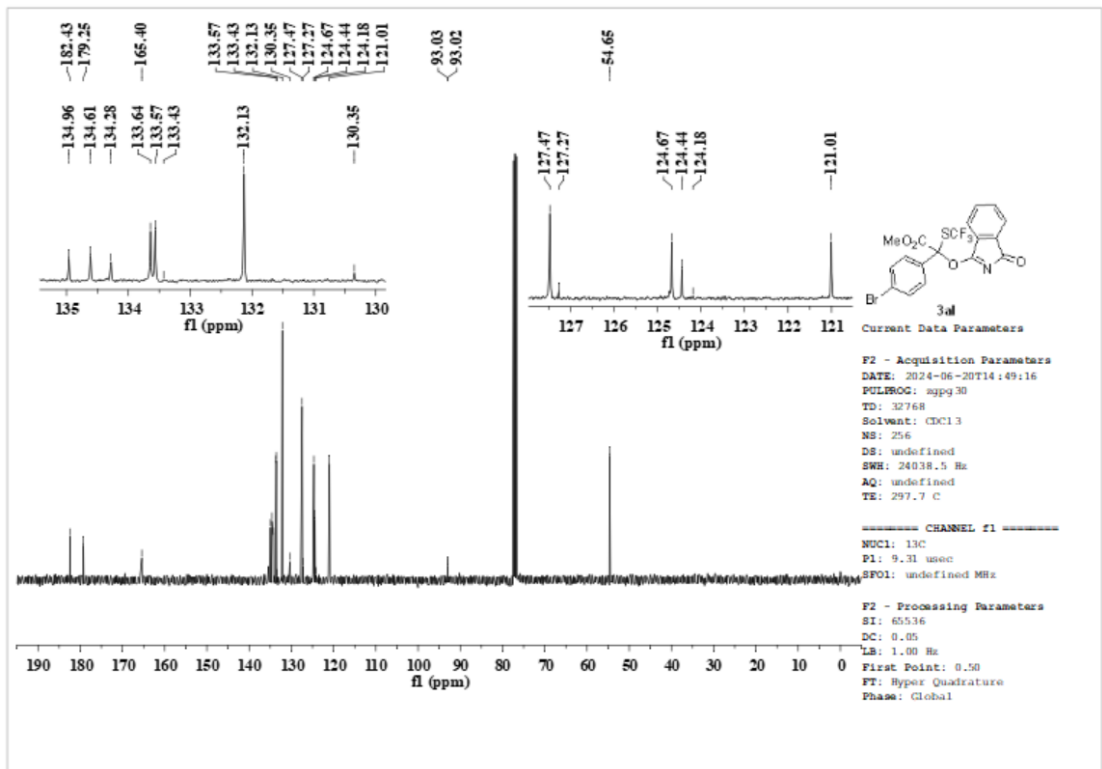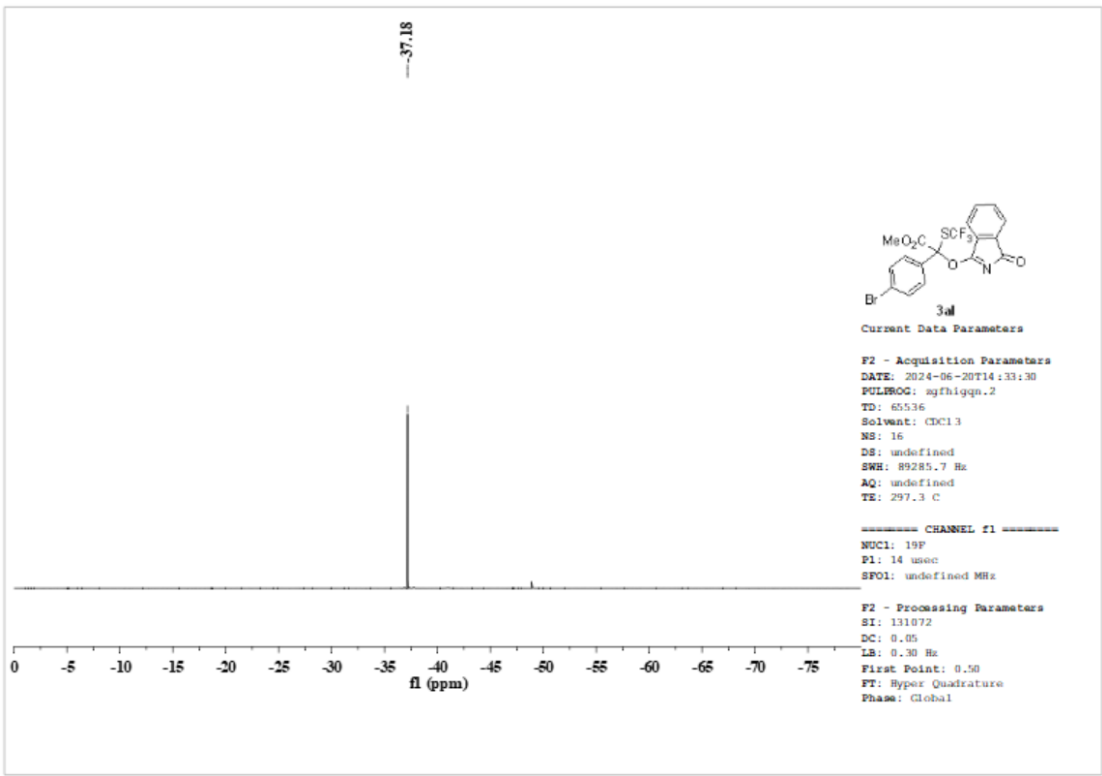

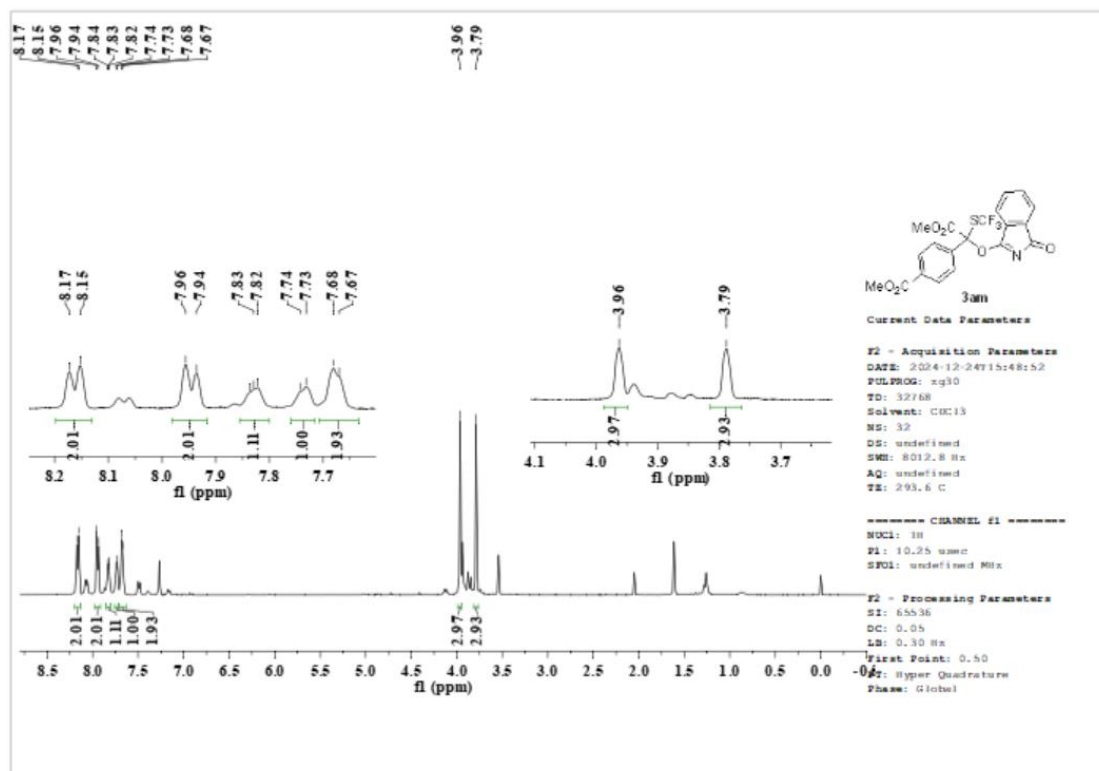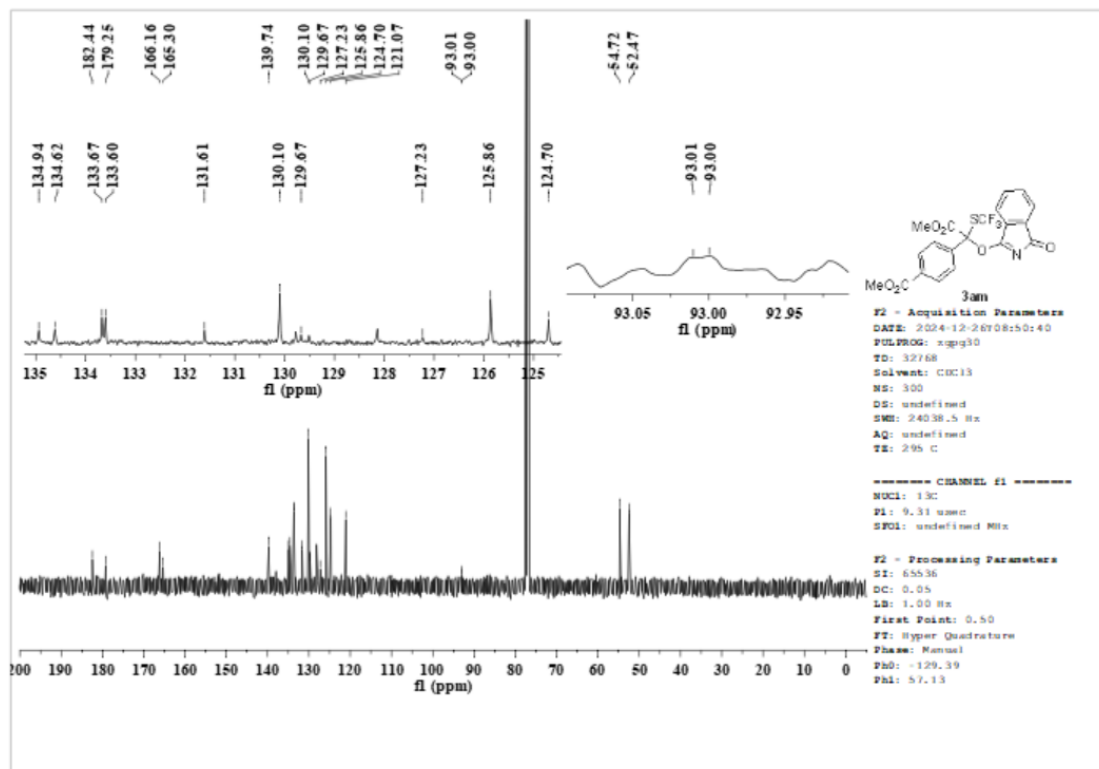

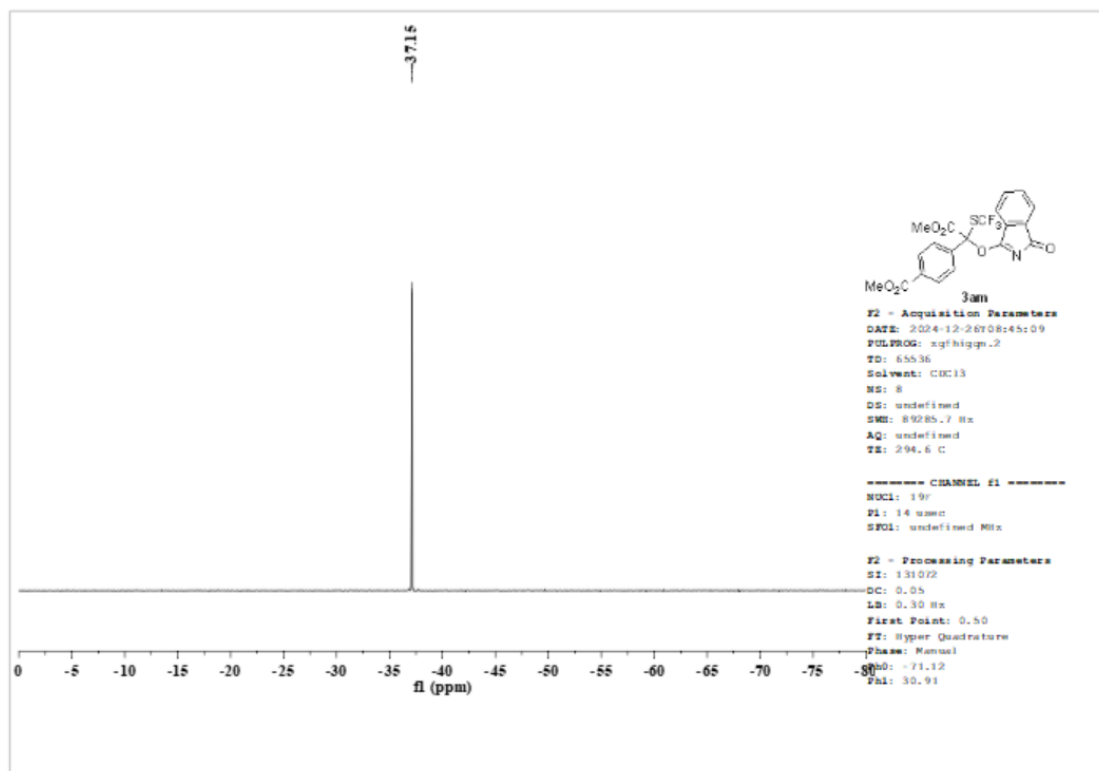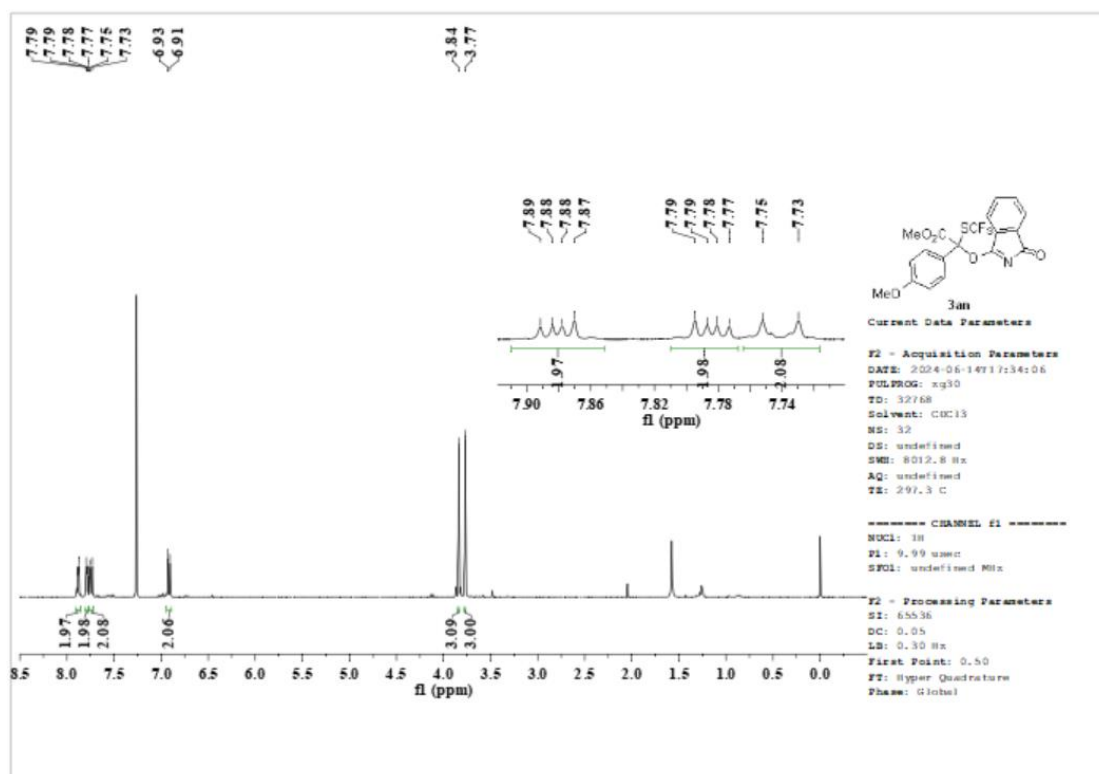

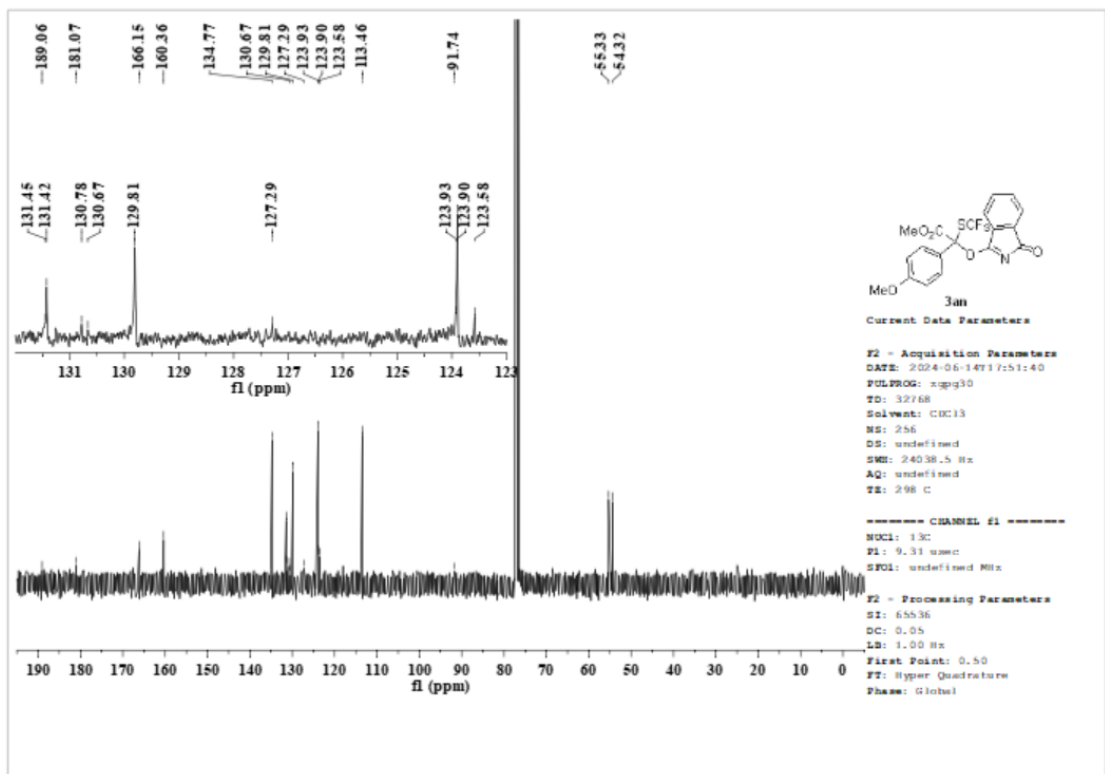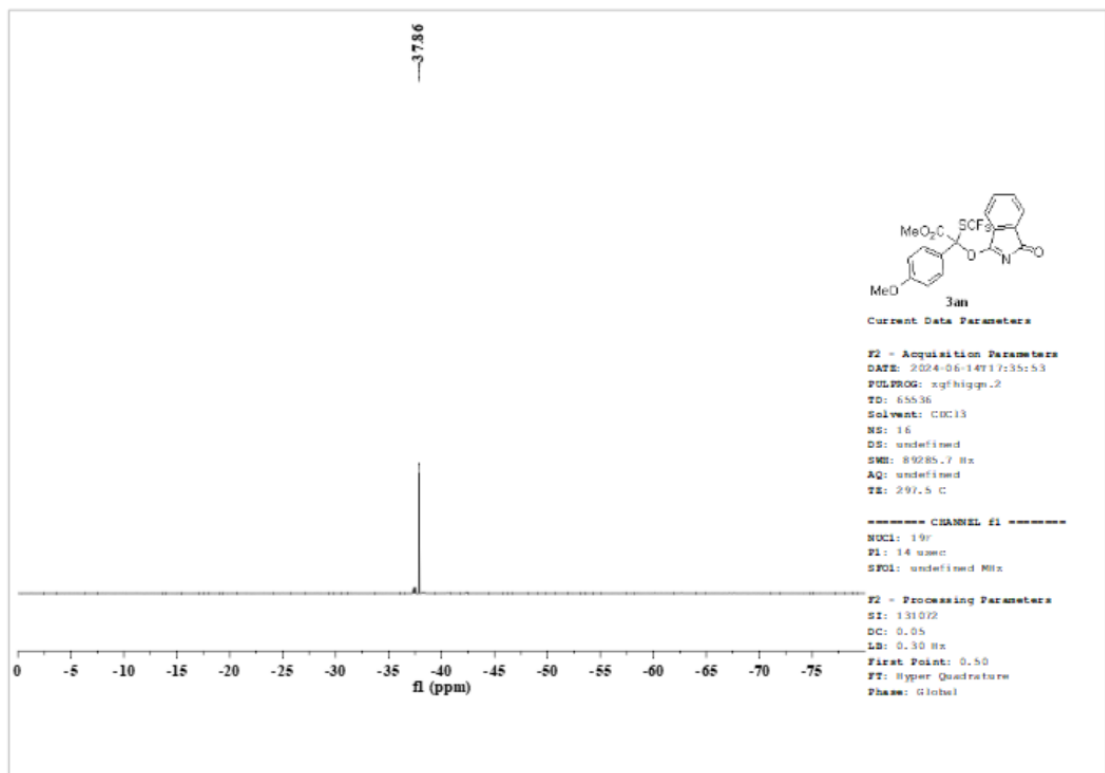



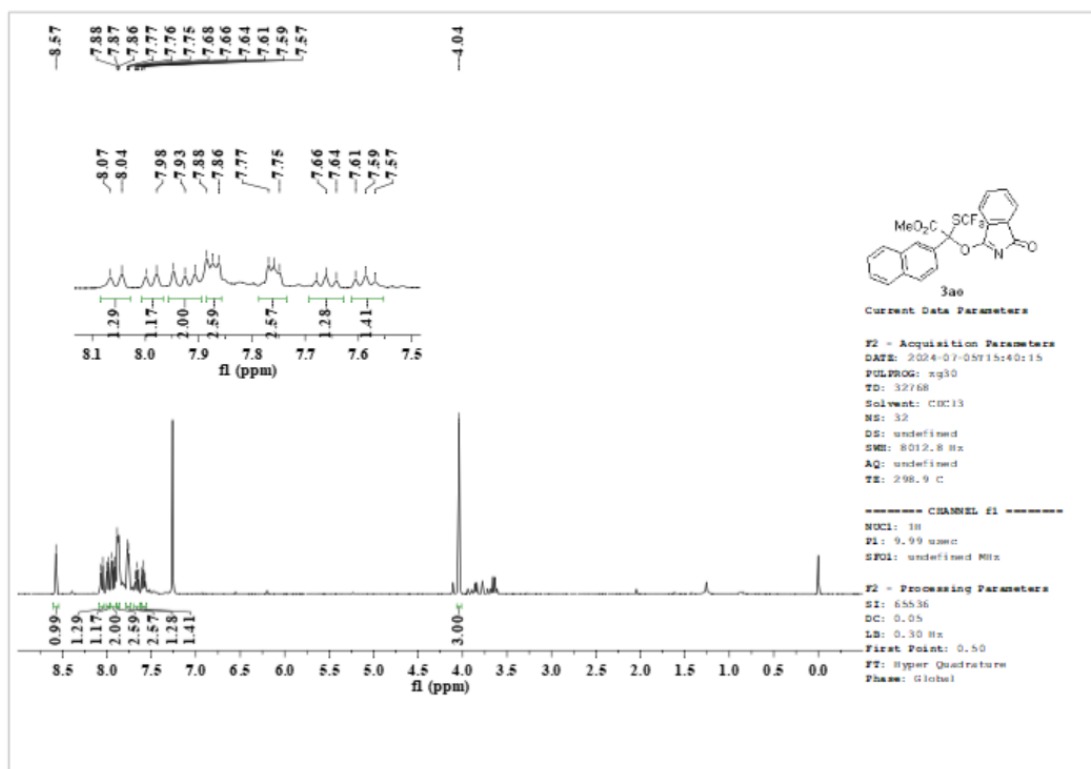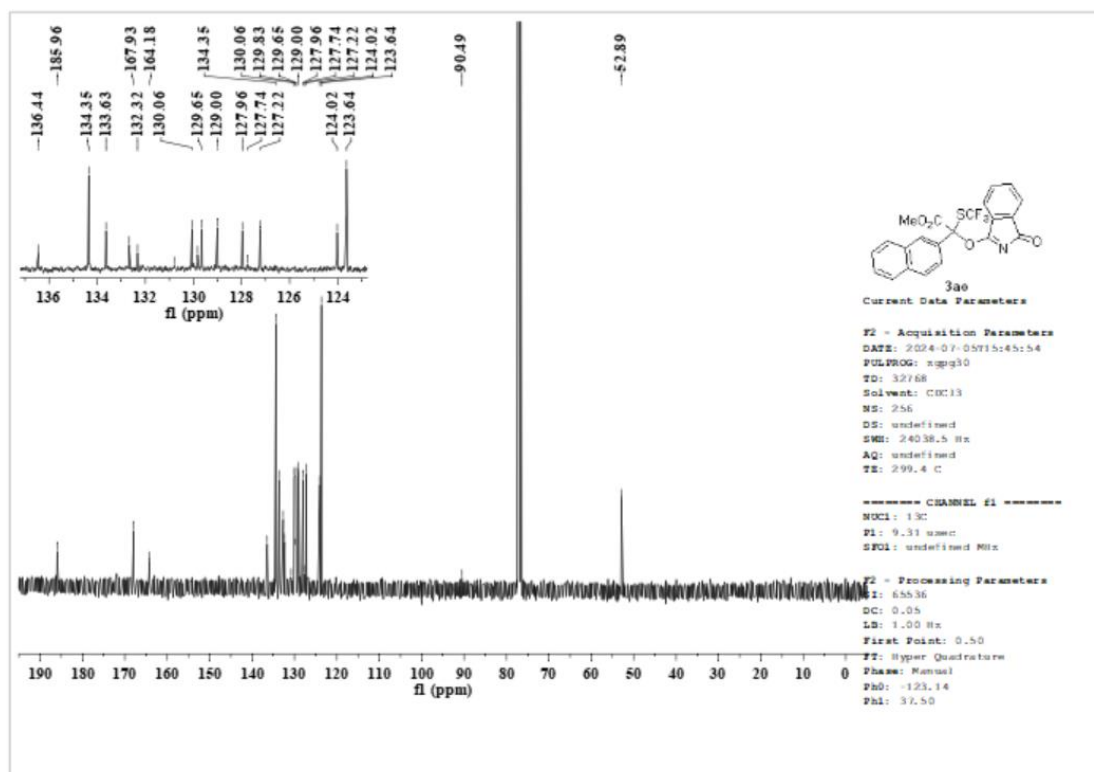

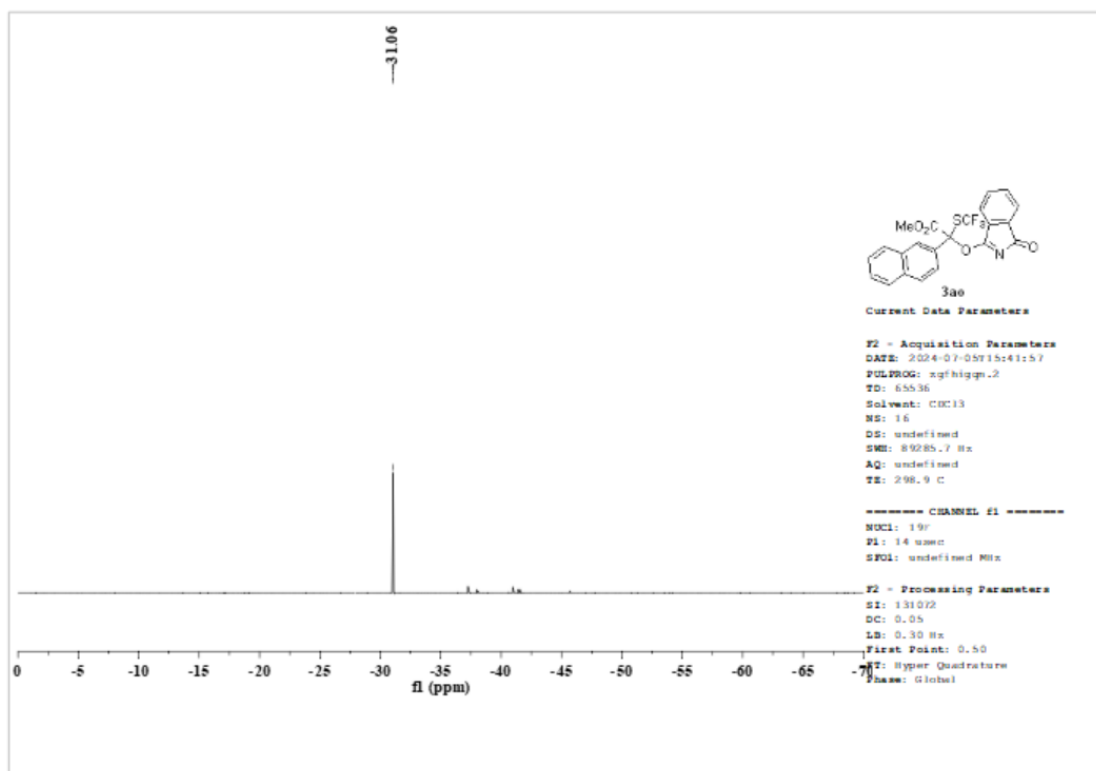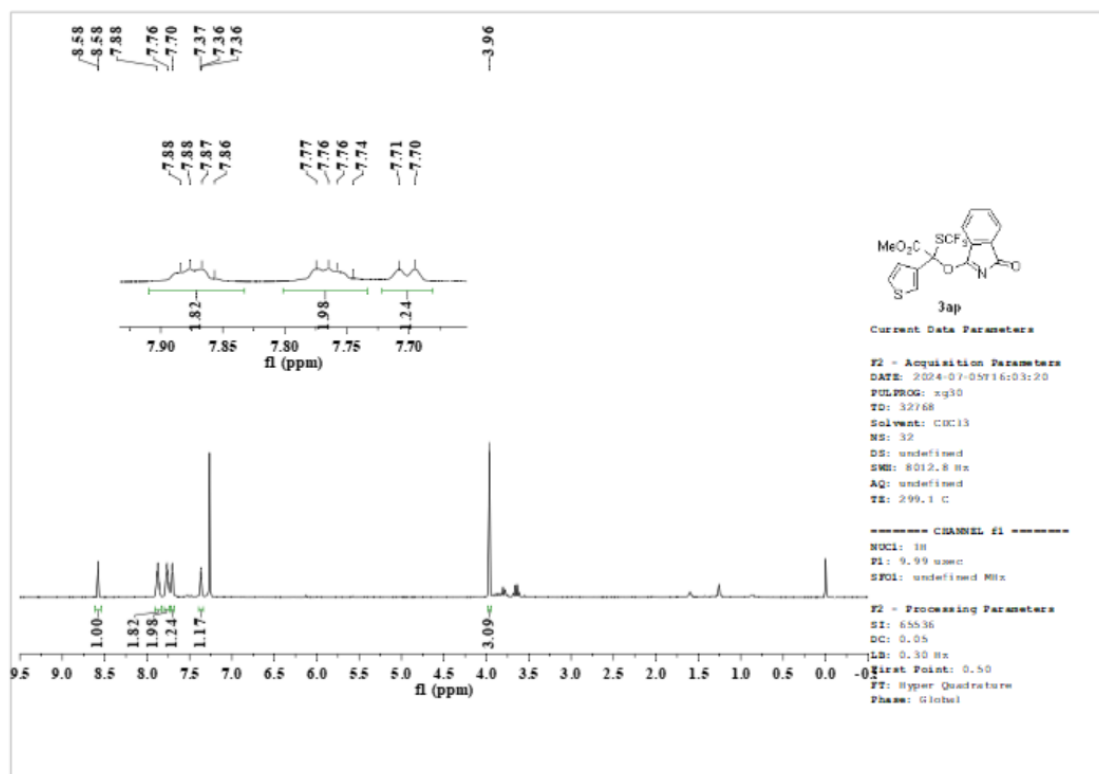

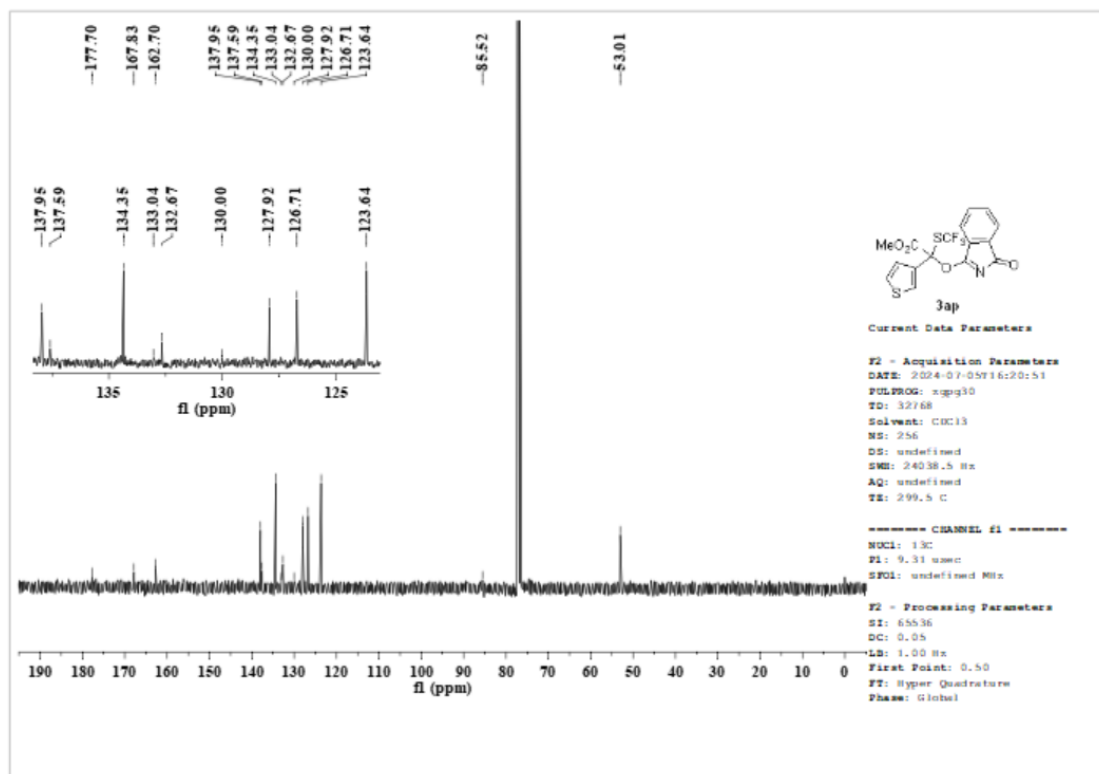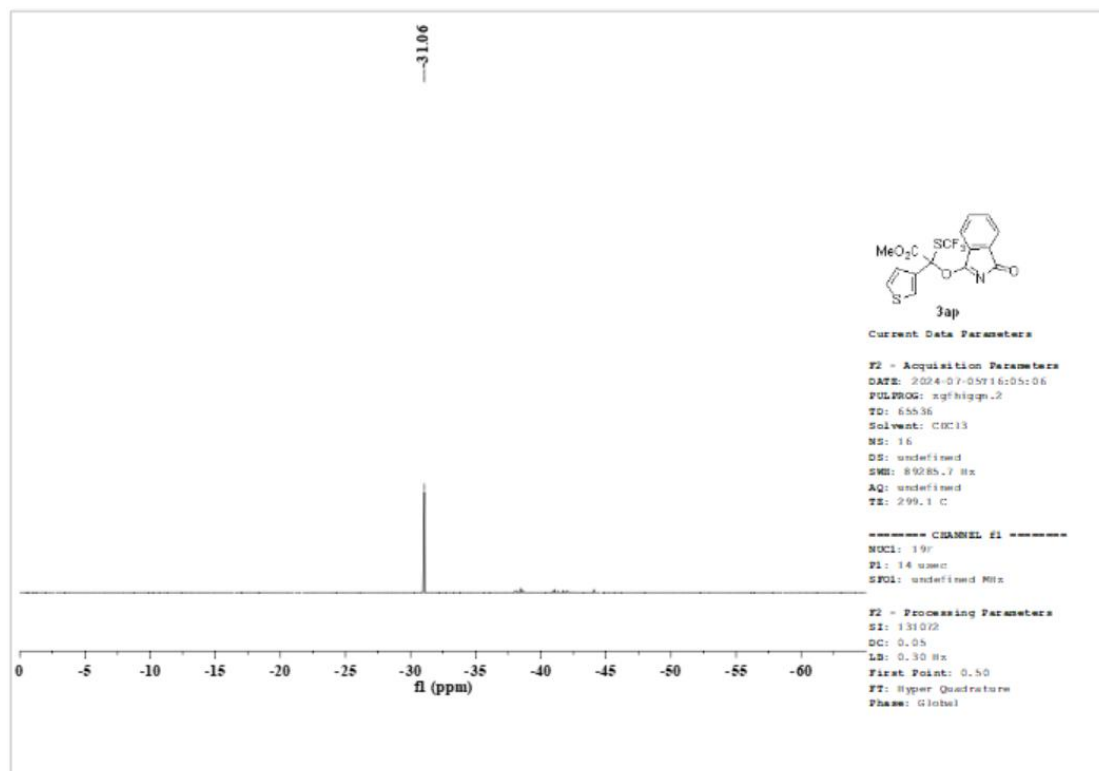

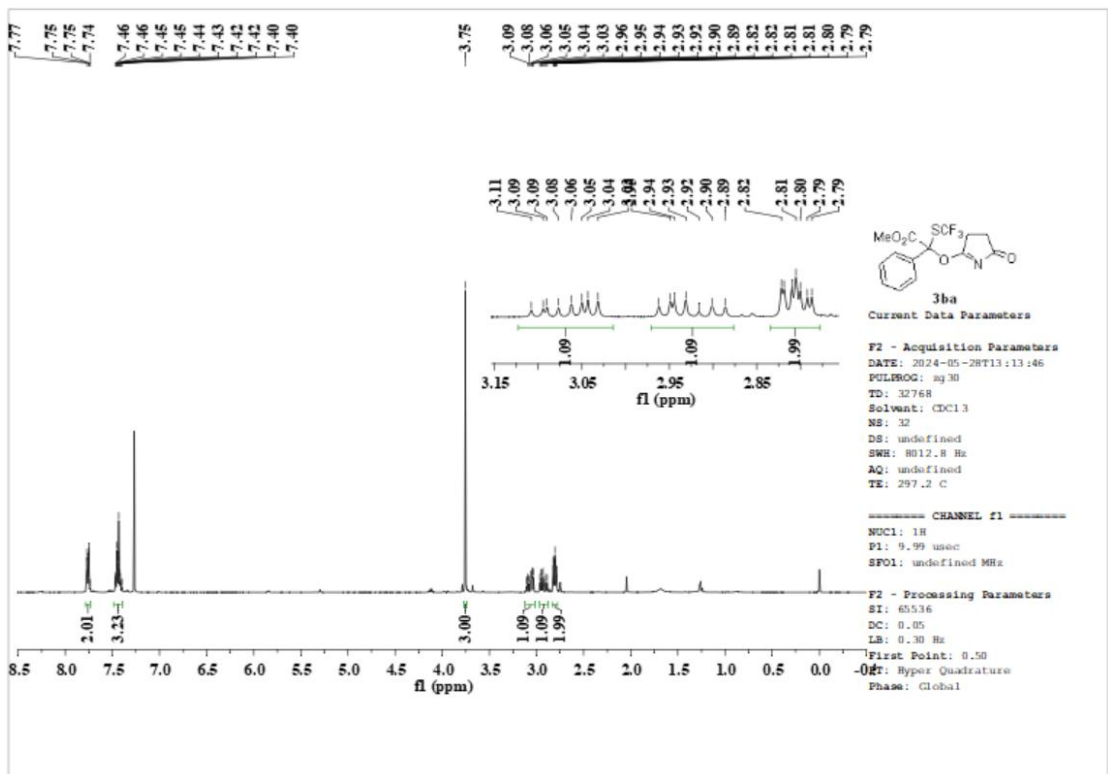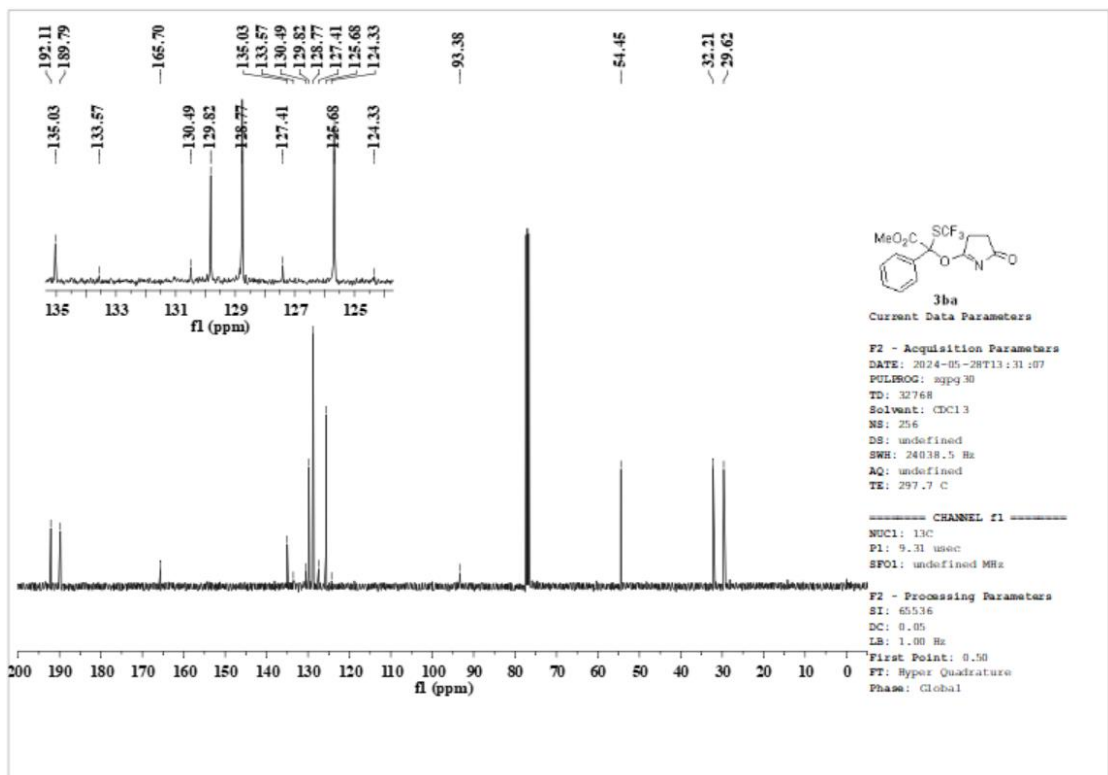

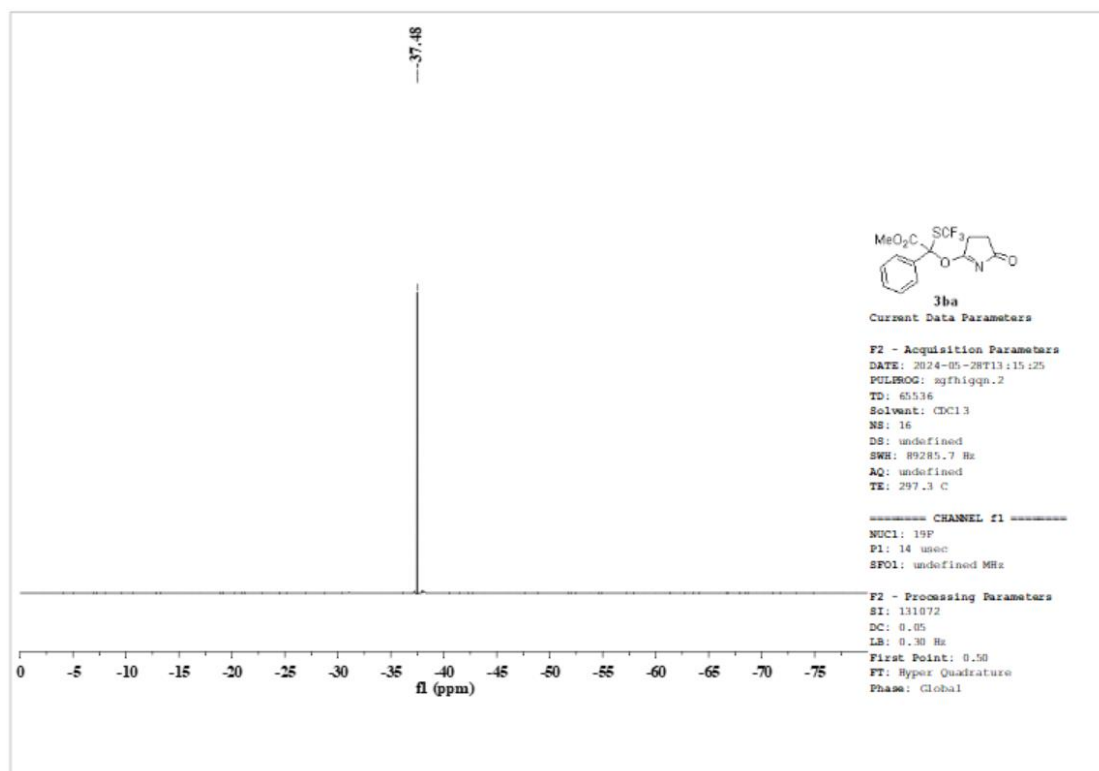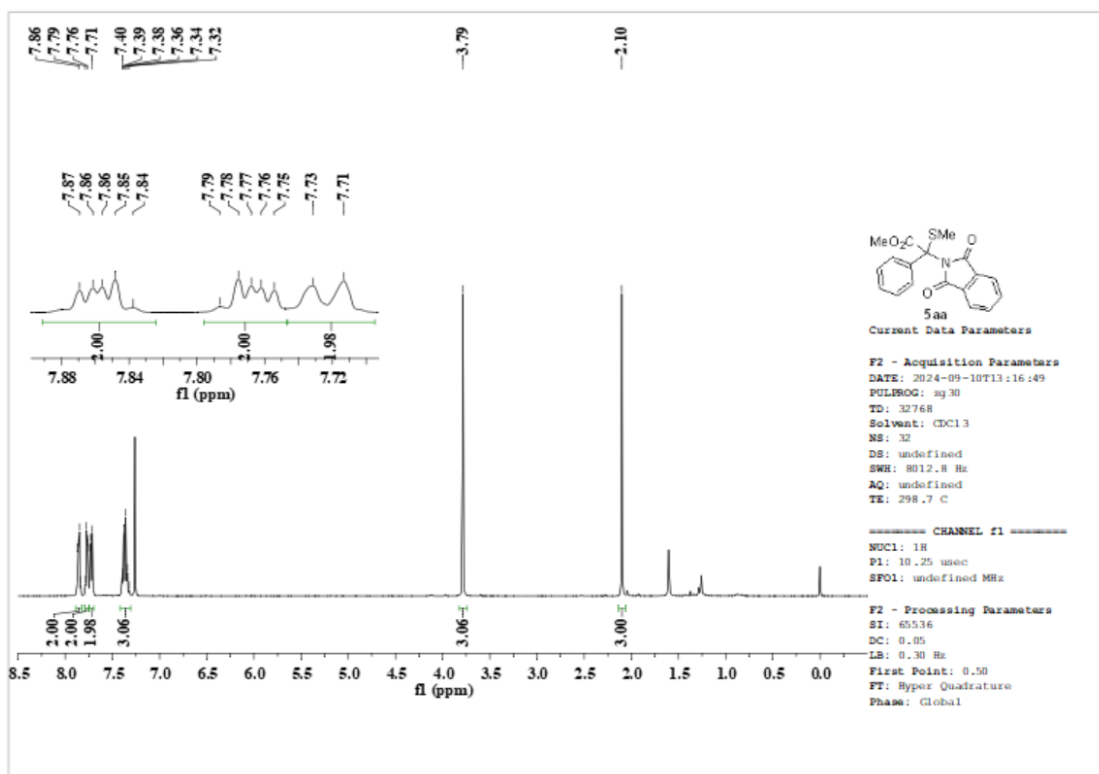

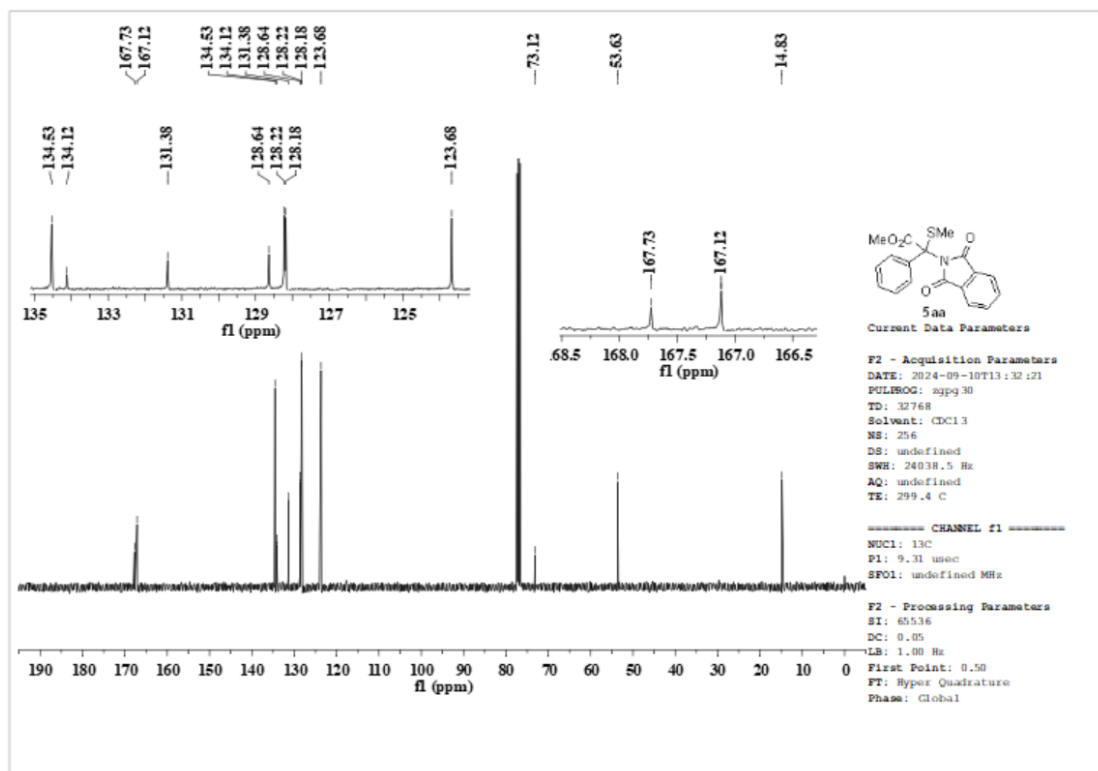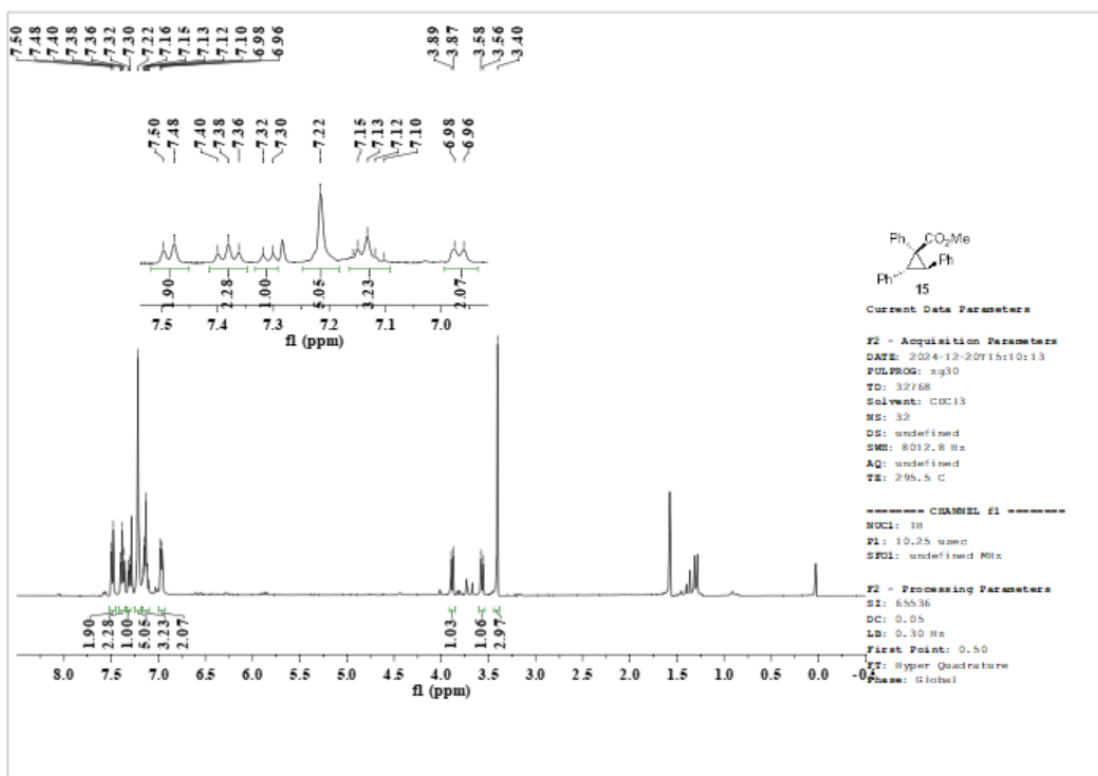

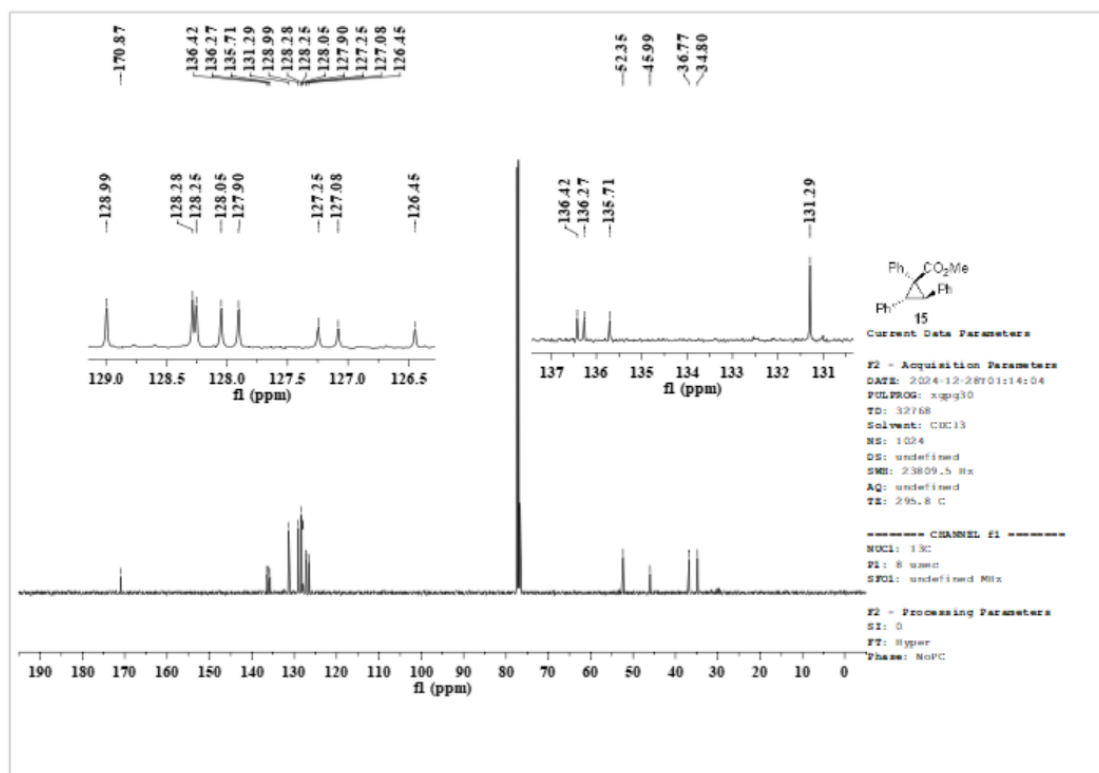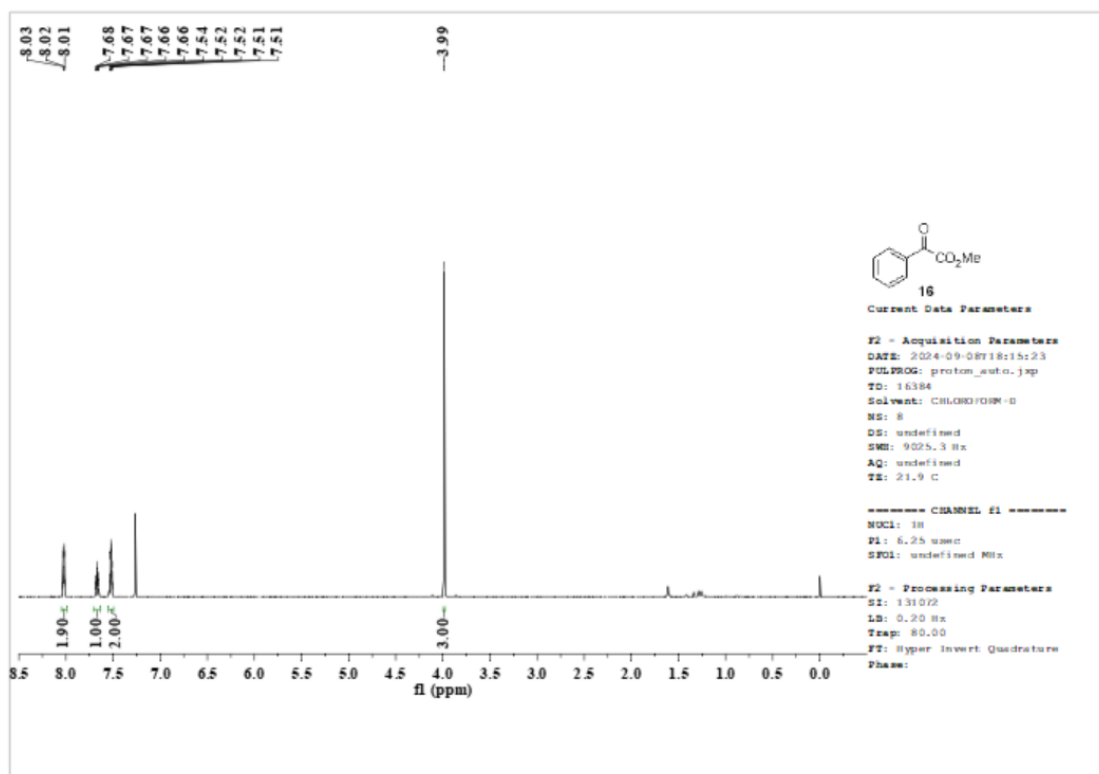

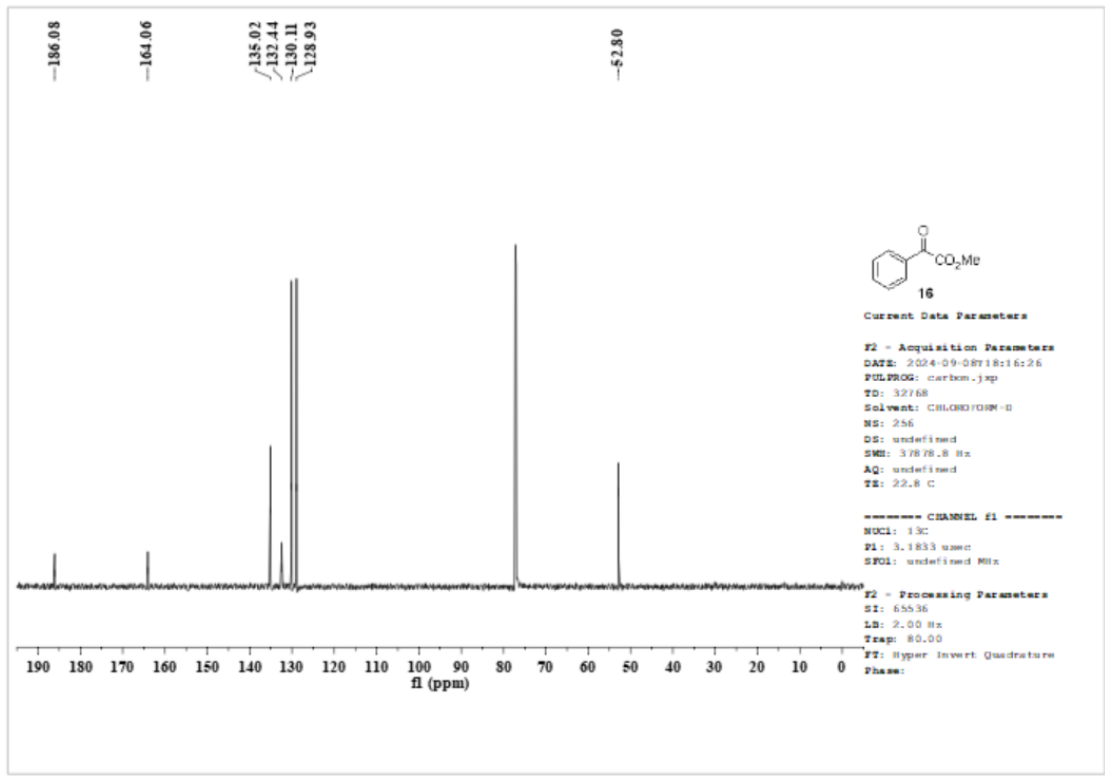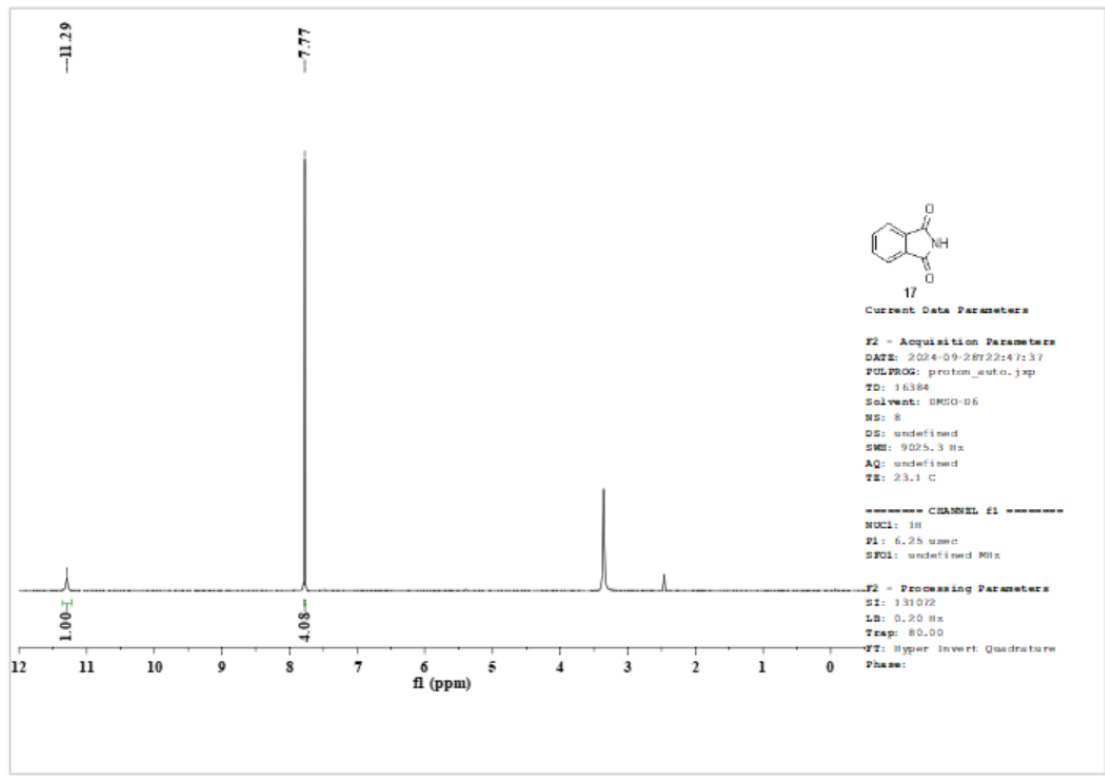



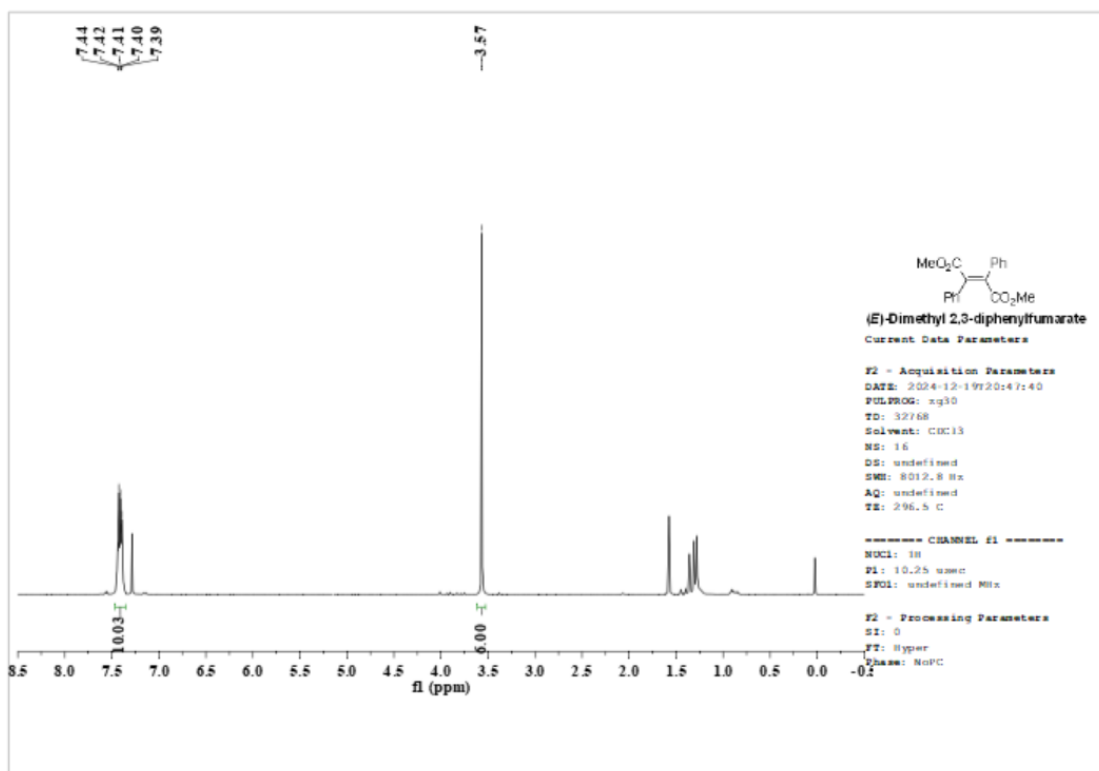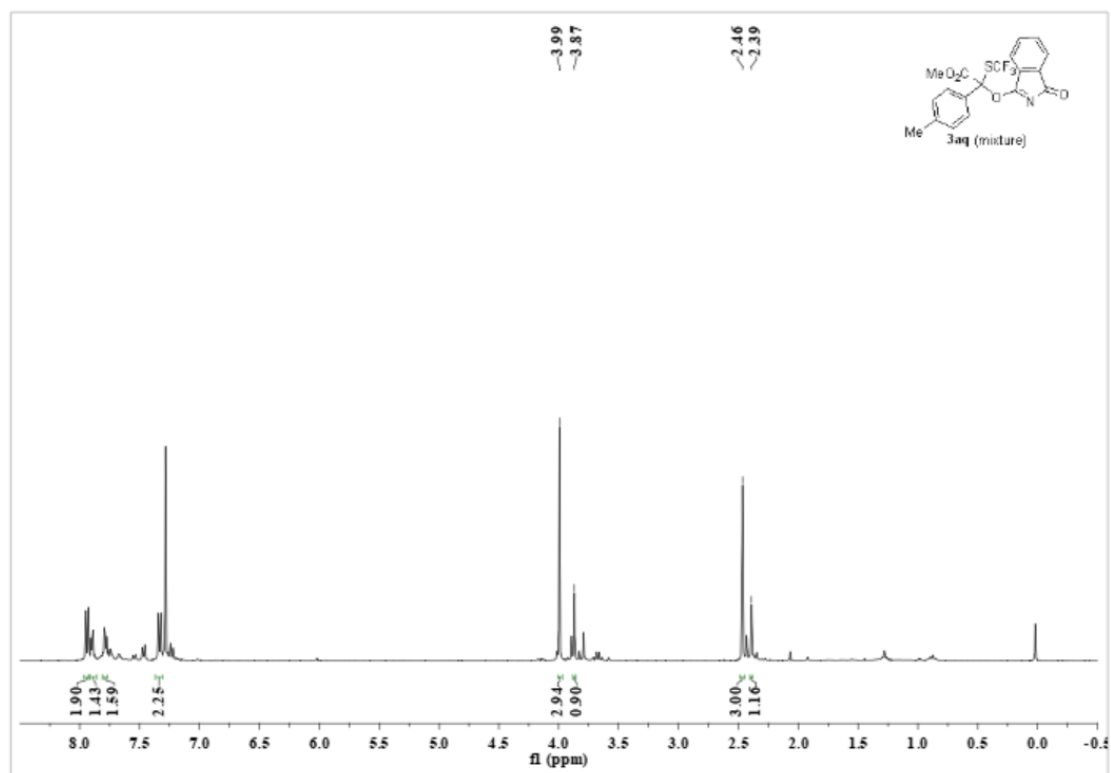

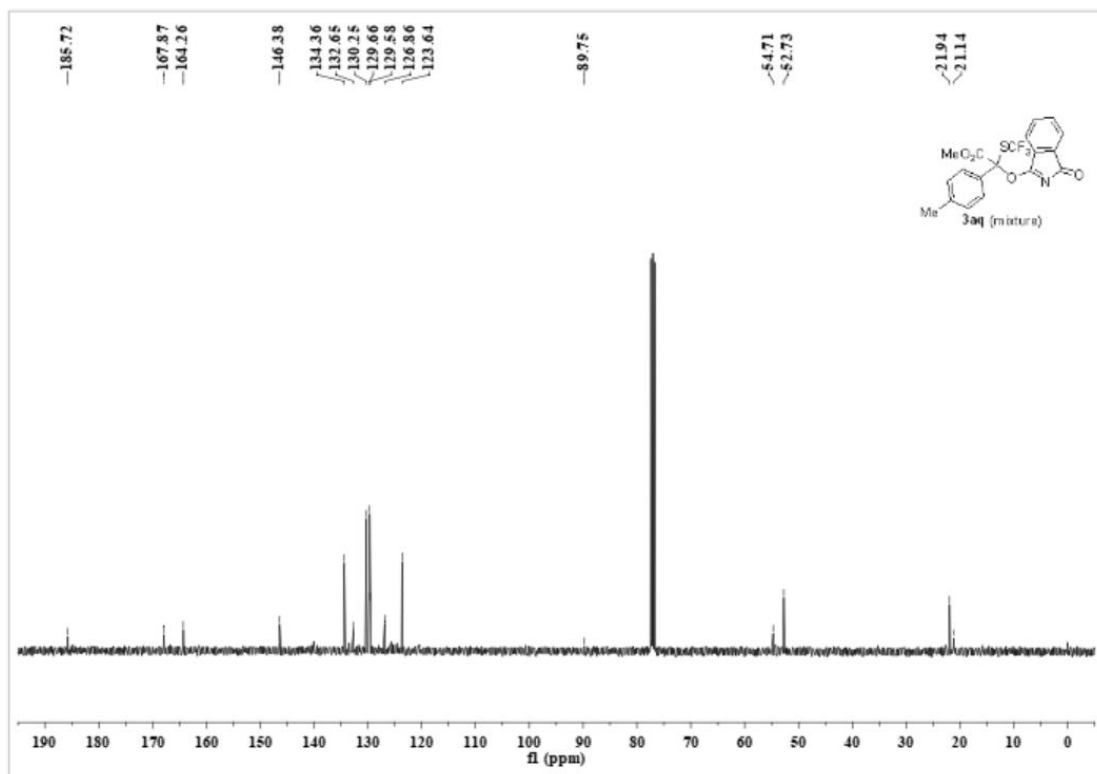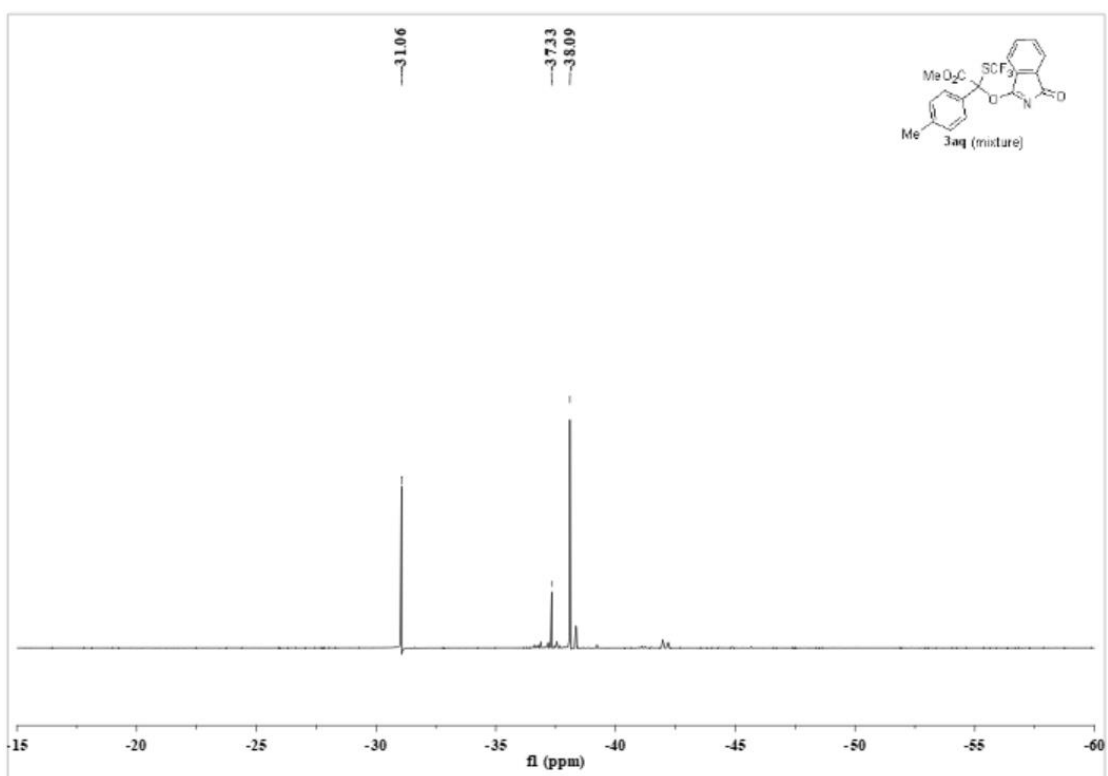

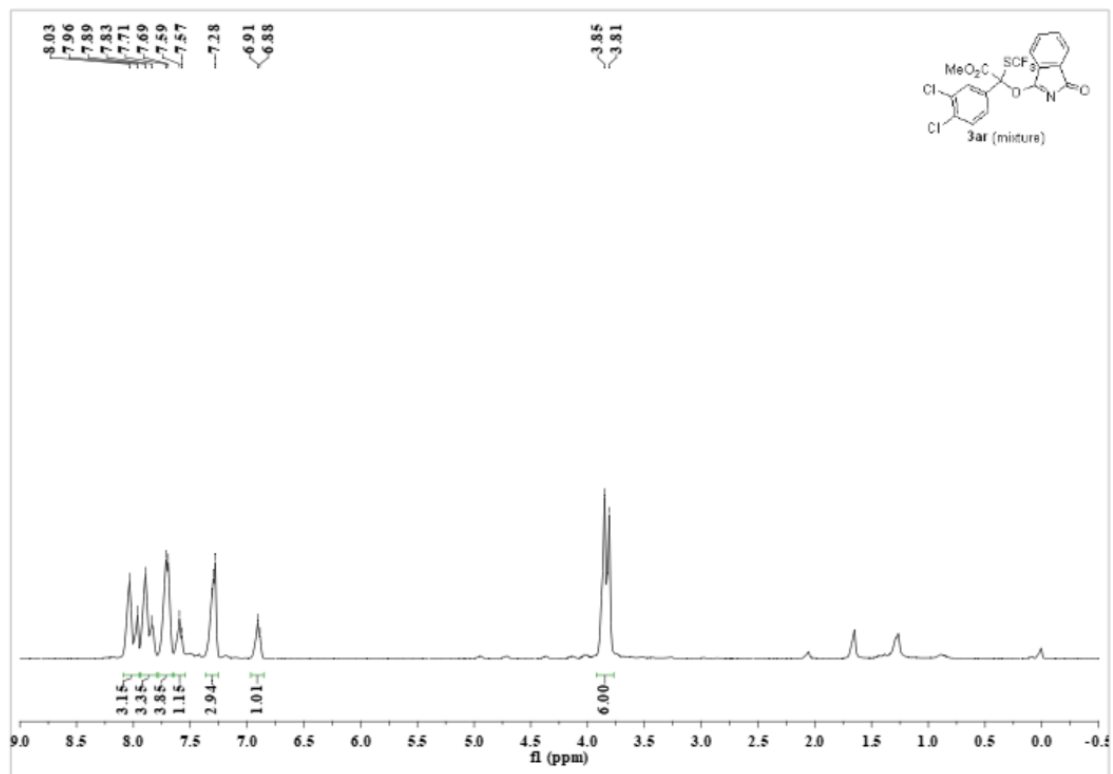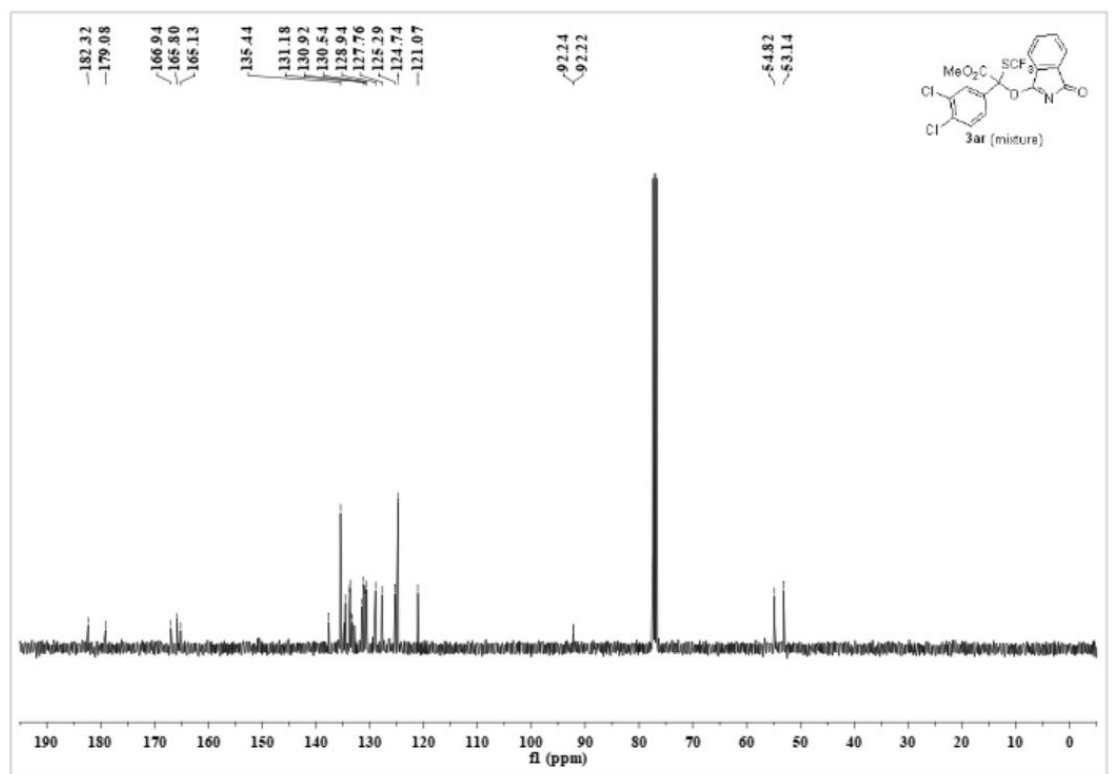

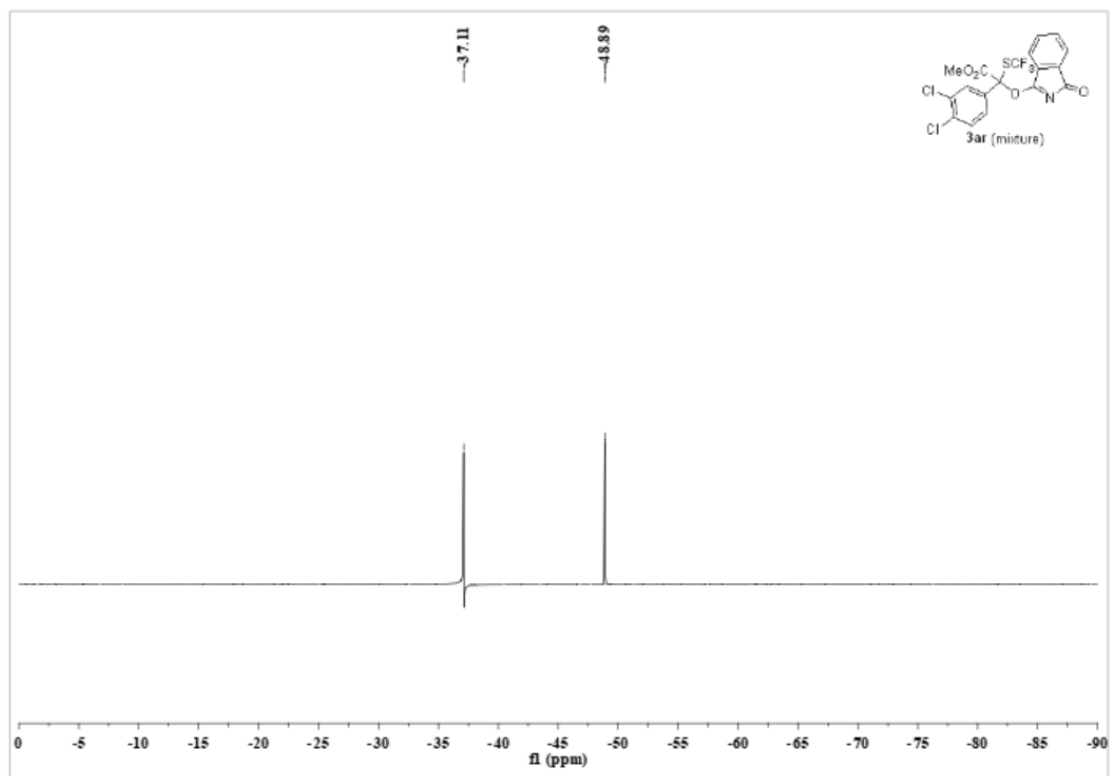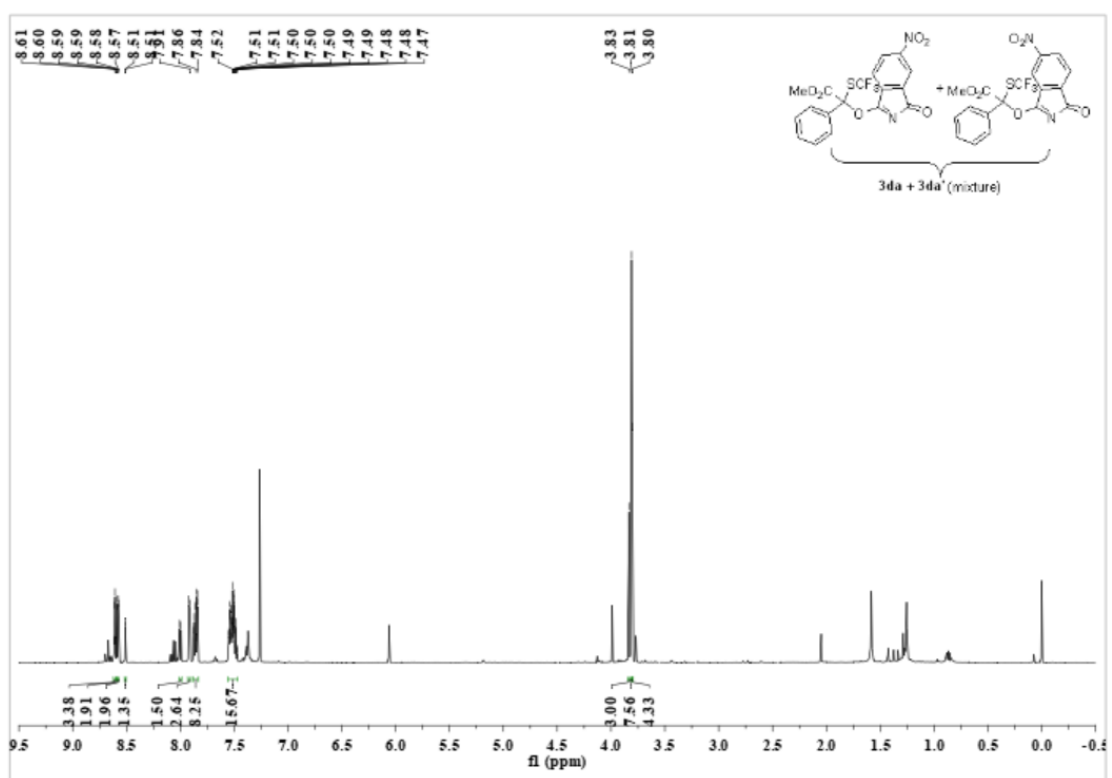

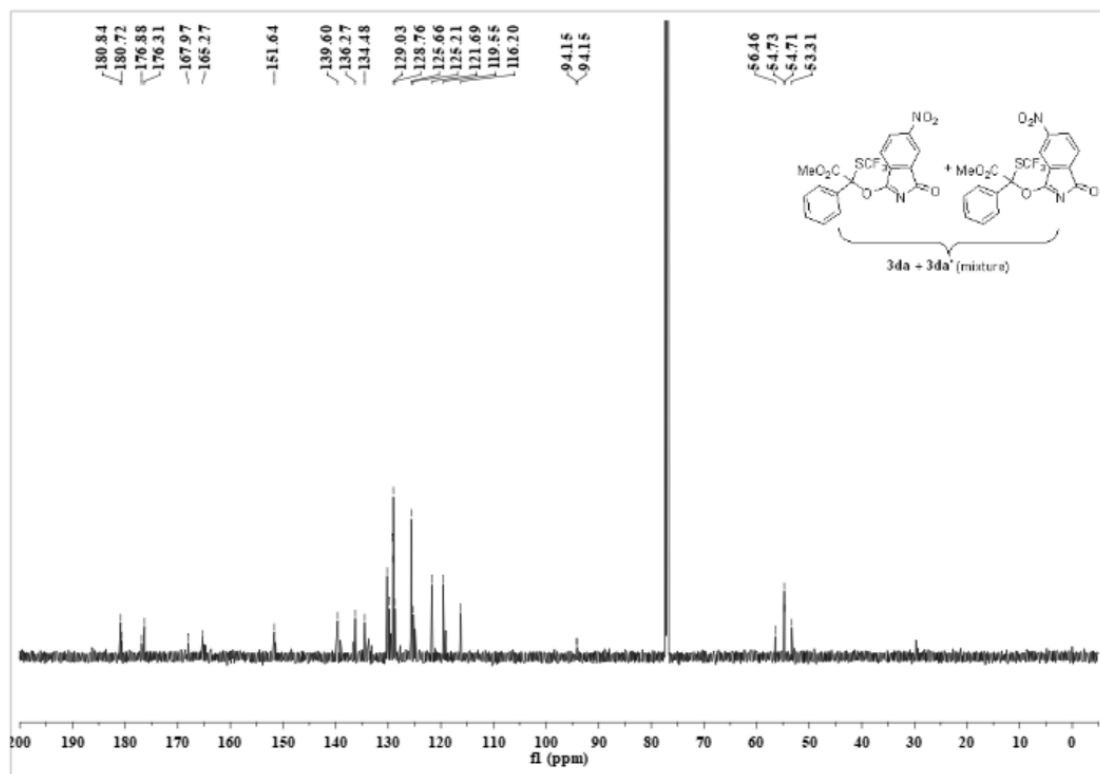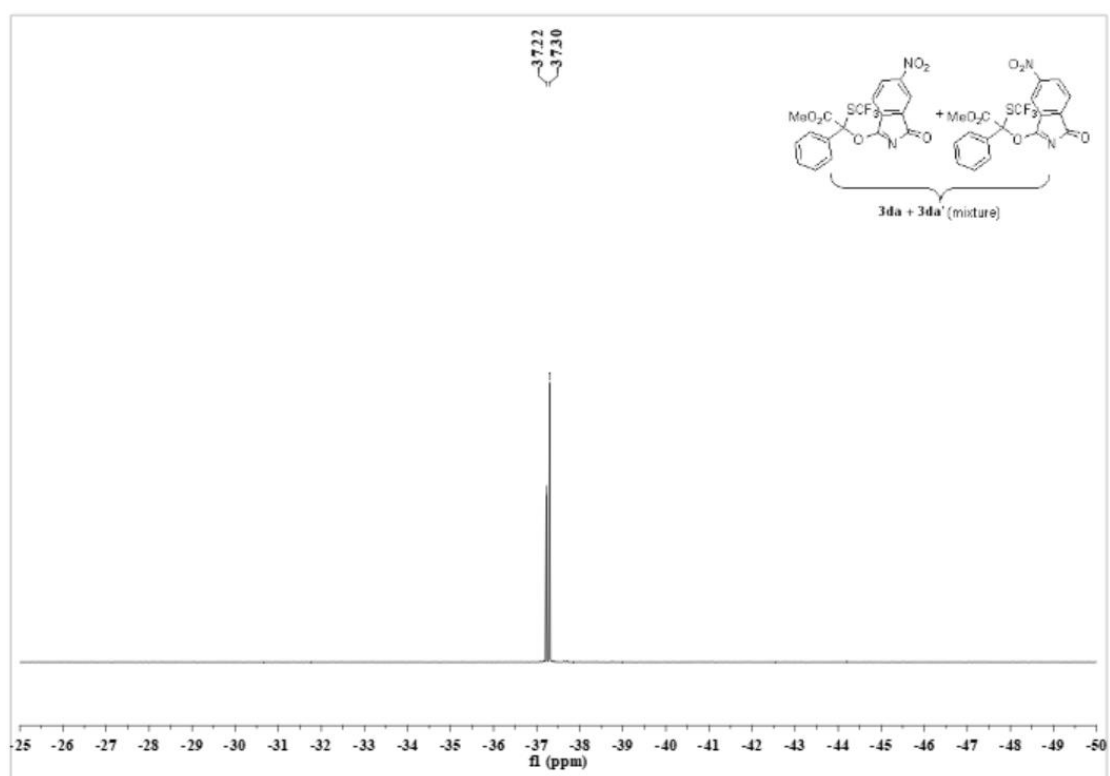

Supplement: d4gc05690f1.pdf [file d4gc05690f1.pdf]
